# Supplementary material for: Nuclear NAD+-biosynthetic enzyme NMNAT1 facilitates development and early survival of retinal neurons
Source: eLife. 2021 Dec 8;10:e71185. doi: 10.7554/eLife.71185 (PMC8754432; doi:10.7554/eLife.71185)
Supplement: Figure 1—source data 1. — Numerical source data for retinal thickness quantification in P0, P4, and P10 WT and KO retinas. [file elife-71185-fig1-data1.xlsx]

## Sheet: Sheet1
Note: all replicates are biological replicates (distinct animals) unless otherwise noted, genotypes (WT vs KO) are color coded
Where multiple p-values are presented, highlighted column denotes those which are shown in the final figures by asterisks
Figure 1B: Relative Nmnat1 mRNA levels in P0 WT (+/+) and KO (-/-) retinas
	+/+	-/-
Replicate 1	1.06365	0.28966		p-value (unpaired t-test)
Replicate 2	1.06699	0.20263		0.0004
Replicate 3	0.86936	0.23968
Figure 1H-J: Retinal thickness measurements in WT (+/+) and KO (-/-) retinas
P0
	WT			KO
Distance from optic nerve (um)	Replicate 1	Replicate 2	Replicate 3	Replicate 1	Replicate 2	Replicate 3	p-value (KO vs WT, unpaired t-test)
-1200	146.44	146.94	171.76	156.45	148.81	139.61	0.523313
-900	171.48	161.5	179.11	172.86	149.99	160.81	0.319503
-600	181.89	177.49	184.53	176.66	143.98	183.29	0.340317
-300	177.31	176.77	175.35	154.5	133.46	155.27	0.016023
0	0	0	0	0	0	0	-
300	159.02	151.11	179.96	148.79	160.57	141.75	0.272044
600	159.46	148.97	185.55	152.93	164.72	143.84	0.433179
900	155.65	144.65	179.22	156.95	157.22	147.76	0.611585
1200	153.83	151.88	173.51	159.68	145.95	158.79	0.58028
P4
	WT				KO
Distance from optic nerve (um)	Replicate 1	Replicate 2	Replicate 3	Replicate 4	Replicate 1	Replicate 2	Replicate 3	Replicate 4	Replicate 5	p-value (KO vs WT, unpaired t-test)
-1700	175.99	173.26	162.94	183.78	133.77	153.79	174.25	166.37	162.34	0.1109
-1275	176.51	187.46	177.22	204.55	143.6	158.9	183.79	162.6	158.28	0.031289
-850	180.7	203.4	213.02	217.57	140.68	142.47	185.17	138.59	153.48	0.003867
-425	200.21	224.27	224.33	222.11	103.29	92.41	179.46	83.35	82.15	0.001332
0	0	0	0	0	0	0	0	0	0	-
425	211.33	208.57	221.4	213.98	134.13	99.27	165.29	137.15	89.42	0.000795
850	205.57	197.81	210.92	201.94	166.56	148.85	159.84	175.39	159.56	0.000127
1275	183.56	173.32	185.36	193.12	155.27	148.84	154.49	174.62	169.71	0.00986
1700	122.88	154.95	182.76	190.01	148.71	163.13	151.38	170.29	156.38	0.750523
P10
	WT			KO
Distance from optic nerve (um)	Replicate 1	Replicate 2	Replicate 3	Replicate 1	Replicate 2	Replicate 3	p-value (KO vs WT, unpaired t-test)
-1760	167.6	162.9	158.12	136.89	125.4	98.43	0.022024
-1320	187.01	169.33	171.03	133.65	126.32	131.31	0.001674
-880	202.07	185.33	201.16	141.4	132.76	134.1	0.000581
-440	234.15	210.26	229.91	126.29	101.04	83.37	0.00111
0	0	0	0	0	0	0	-
440	247.09	227.12	237.16	102.08	97.32	73.44	0.000159
880	234.16	199.25	200.24	120.6	109.68	121.81	0.001492
1320	198.93	175.6	170.19	131.07	119.37	132.23	0.005146
1760	181.82	163.52	155.33	103.72	121.75	142.85	0.032665
