# Supplementary material for: Nuclear NAD+-biosynthetic enzyme NMNAT1 facilitates development and early survival of retinal neurons
Source: eLife. 2021 Dec 8;10:e71185. doi: 10.7554/eLife.71185 (PMC8754432; doi:10.7554/eLife.71185)
Supplement: Figure 2—source data 1. [file elife-71185-fig2-data1.xlsx]

## Sheet: Sheet1
		Figure 2P-R: Quantification of ganglion (BRN3A+) , amacrine (CALR+), and bipolar (CHX10+) neurons in WT (+/+) and KO (-/-) retinal sections
		Brn3a
		age	WT			KO			p-value (KO vs WT, unpaired t-test)
		P4	37.5	33	28.5	25	25	33	0.225272
		P10	33	32	29.5	38.5	32	24	>0.999999
		CALB
		age	WT			KO			p-value (KO vs WT, unpaired t-test)
		P0	17	18.2	15.4	12.8	8.5	11	0.015187
		P4	22.4	19.7	13.4	13.2	10.1	9.3	0.058214
		CALR
		age	WT			KO			p-value (KO vs WT, unpaired t-test)
		P4	27.5	28.5	23	20	24	28	0.460758
		P10	42	49	45.5	26.5	23.5	17	0.002577
		CHX10
		age	WT			KO			p-value (KO vs WT, unpaired t-test)
		P4	117.5	94.5	98.5	88	73.5	139.5	0.888725
		P10	157	158	185.5	45.5	38	45.5	0.000214
