# Supplementary material for: Nuclear NAD+-biosynthetic enzyme NMNAT1 facilitates development and early survival of retinal neurons
Source: eLife. 2021 Dec 8;10:e71185. doi: 10.7554/eLife.71185 (PMC8754432; doi:10.7554/eLife.71185)
Supplement: Figure 3—figure supplement 1—source data 1. [file elife-71185-fig3-figsupp1-data1.xlsx]

## Sheet: Sheet1
Figure 3 Supplement 1 Panel J: Relative expression of select genes in P4 KO (-/-) retinas using RNA-seq and RT-qPCR
	RNA-seq					RT-qPCR
Gene	Replicate 1	Replicate 2	Replicate 3	Replicate 4	Replicate 5	Replicate 1	Replicate 2	Replicate 3	p-value (RNA-seq vs RT-qPCR, unpaired t-test)
Cep290	0.529105	0.447903	0.545233	0.644929	0.731181	0.51289	0.54008	0.48864	0.259784
Prom1	0.526031	0.420433	0.534091	0.559719	0.82084	0.49225	0.4704	0.42168	0.176356
Gnat1	0.363836	0.281635	0.379273	0.591089	0.618398	0.38316	0.36028	0.23752	0.187556
Rp1	0.405086	0.382153	0.407182	0.521474	0.613918	0.35164	0.3869	0.35989	0.086519
Nmnat2	0.977603	1.24327	1.01324	1.10745	0.89802	1.17138	0.81944	0.5328	0.381143
Nmnat3	0.77503	0.849871	0.829399	0.921272	0.822043	0.93714	0.71245	0.756	0.647332
