# Supplementary material for: Nuclear NAD+-biosynthetic enzyme NMNAT1 facilitates development and early survival of retinal neurons
Source: eLife. 2021 Dec 8;10:e71185. doi: 10.7554/eLife.71185 (PMC8754432; doi:10.7554/eLife.71185)
Supplement: Figure 3—figure supplement 1—source data 2. [file elife-71185-fig3-figsupp1-data2.xlsx]

## Sheet: Sheet1
Figure 3 Supplement 1 Panel C: Quantification of PHH3-positive nuclei in P0 knockout and control retinal sections
WT (+/+)	KO (-/-)		p-value (unpaired t-test)	0.1069
35	27
27.5	26.5
30.5	20
