# Supplementary material for: Nuclear NAD+-biosynthetic enzyme NMNAT1 facilitates development and early survival of retinal neurons
Source: eLife. 2021 Dec 8;10:e71185. doi: 10.7554/eLife.71185 (PMC8754432; doi:10.7554/eLife.71185)
Supplement: Figure 3—figure supplement 2—source data 1. [file elife-71185-fig3-figsupp2-data1.xlsx]

## Sheet: Sheet1
Figure 3 Supplement 2 Panel C: Pathway overrepresentation analysis of significantly changed genes in P4 KO (-/-) retinas
Upregulated
Annotation Cluster 1	Enrichment Score: 7.639043050184791
Category	Term	Count	PValue	Genes	List Total	Pop Hits	Pop Total	Fold Enrichment	Bonferroni	Benjamini	FDR
GOTERM_BP_DIRECT	GO:0006351~transcription, DNA-templated	147	1.05986e-09	21389, 268417, 14051, 21387, 13000, 12396, 16872, 12393, 24136, 22632, 77110, 194655, 57741, 239528, 226182, 192195, 30946, 18018, 18019, 12677, 16363, 21676, 244579, 18027, 18028, 18021, 244059, 11908, 71375, 383491, 74123, 71890, 22642, 56381, 12606, 11910, 13819, 353187, 13134, 14103, 230700, 17977, 217127, 21885, 214498, 71389, 22059, 21405, 21887, 27224, 12013, 216825, 235626, 58180, 20683, …	820	1878	17172	1.63919	3.77522e-06	7.95072e-07	7.89492e-07
GOTERM_MF_DIRECT	GO:0003700~transcription factor activity, sequence-specific DNA binding	80	1.94027e-08	21389, 329934, 268417, 21387, 20375, 15223, 12396, 12393, 208111, 27049, 16391, 22632, 77110, 12914, 15903, 194655, 226182, 15500, 18018, 18019, 17128, 12753, 105980076, 16363, 21676, 50913, 18027, 18028, 235320, 18021, 11908, 71375, 74123, 30051, 22642, 81879, 22326, 56381, 244813, 11910, 12606, 228876, 13819, 353187, 13134, 18986, 239719, 17259, 434179, 18504, 230700, 217127, 13661, 18034, 2171…	800	870	16818	1.9331	1.86264e-05	6.20886e-06	6.02777e-06
GOTERM_MF_DIRECT	GO:0003677~DNA binding	136	8.89907e-08	21389, 268417, 21387, 16872, 12393, 24136, 22632, 75560, 77110, 194655, 226182, 192195, 30946, 18018, 18019, 12677, 16363, 21676, 244579, 18027, 18028, 235320, 18021, 244059, 67434, 326619, 11908, 71375, 383491, 74123, 100041230, 22642, 56381, 319149, 12606, 11910, 13819, 353187, 58203, 13134, 56702, 326620, 230700, 17977, 106021, 71389, 319758, 22059, 21405, 14957, 27224, 12013, 230738, 320332, …	800	1828	16818	1.56404	8.54274e-05	1.70862e-05	1.65879e-05
GOTERM_BP_DIRECT	GO:0006355~regulation of transcription, DNA-templated	158	1.51835e-07	21389, 268417, 14051, 21387, 13000, 12396, 16872, 12393, 208111, 24136, 22632, 77110, 194655, 57741, 239528, 226182, 192195, 30946, 18018, 18019, 12677, 16363, 21676, 244579, 18027, 18028, 235320, 18021, 244059, 11908, 71375, 383491, 74123, 71890, 22642, 56381, 12606, 11910, 228876, 13819, 353187, 13134, 14103, 230700, 17977, 217127, 21885, 71389, 319758, 22059, 21405, 114604, 21887, 54651, 27224…	820	2220	17172	1.49043	0.00054069	4.50697e-05	4.47534e-05
Annotation Cluster 2	Enrichment Score: 6.364878696774986
Category	Term	Count	PValue	Genes	List Total	Pop Hits	Pop Total	Fold Enrichment	Bonferroni	Benjamini	FDR
GOTERM_BP_DIRECT	GO:0032776~DNA methylation on cytosine	14	8.99193e-10	319153, 319155, 319156, 319160, 319161, 326619, 319152, 100041230, 319157, 319158, 319149, 326620, 97908, 320332	820	32	17172	9.16189	3.20292e-06	7.95072e-07	7.89492e-07
GOTERM_BP_DIRECT	GO:0045815~positive regulation of gene expression, epigenetic	14	8.99193e-10	319153, 319155, 319156, 319160, 319161, 326619, 319152, 100041230, 319157, 319158, 319149, 326620, 97908, 320332	820	32	17172	9.16189	3.20292e-06	7.95072e-07	7.89492e-07
GOTERM_BP_DIRECT	GO:0006334~nucleosome assembly	23	1.11605e-09	319153, 319187, 244349, 319188, 319155, 319156, 319160, 319161, 326619, 319152, 100041230, 319157, 319158, 80838, 319149, 14957, 54169, 101685, 319180, 326620, 56702, 97908, 320332	820	99	17172	4.86519	3.97535e-06	7.95072e-07	7.89492e-07
GOTERM_BP_DIRECT	GO:0006335~DNA replication-dependent nucleosome assembly	14	1.41919e-09	319153, 319155, 319156, 319160, 319161, 326619, 319152, 100041230, 319157, 319158, 319149, 326620, 97908, 320332	820	33	17172	8.88426	5.05514e-06	8.42526e-07	8.36613e-07
GOTERM_BP_DIRECT	GO:0045653~negative regulation of megakaryocyte differentiation	10	2.10438e-08	319155, 319156, 319160, 319161, 326619, 100041230, 319157, 326620, 319158, 320332	820	17	17172	12.3185	7.49551e-05	8.77519e-06	8.7136e-06
GOTERM_BP_DIRECT	GO:0051290~protein heterotetramerization	15	2.2172e-08	319153, 319155, 319156, 319160, 319161, 326619, 319152, 100041230, 319157, 319158, 319149, 192167, 326620, 97908, 320332	820	47	17172	6.68345	7.89736e-05	8.77519e-06	8.7136e-06
GOTERM_BP_DIRECT	GO:0000183~chromatin silencing at rDNA	16	2.6352e-08	319153, 319155, 319156, 319160, 75316, 319161, 326619, 319152, 100041230, 319157, 319158, 319149, 20017, 326620, 97908, 320332	820	55	17172	6.09206	9.38613e-05	9.38657e-06	9.32069e-06
GOTERM_CC_DIRECT	GO:0000228~nuclear chromosome	15	5.59958e-08	319153, 319155, 319156, 319160, 319161, 326619, 72400, 319152, 100041230, 319157, 319158, 319149, 326620, 97908, 320332	860	52	18756	6.29114	3.2309e-05	8.07739e-06	7.76942e-06
GOTERM_CC_DIRECT	GO:0000786~nucleosome	20	2.2361e-07	319153, 244349, 319188, 319155, 319156, 319160, 319161, 326619, 319152, 100041230, 319157, 319158, 80838, 319149, 14957, 54169, 326620, 56702, 97908, 320332	860	104	18756	4.1941	0.000129015	1.84319e-05	1.77291e-05
GOTERM_MF_DIRECT	GO:0042393~histone binding	22	2.73072e-07	319153, 21951, 319155, 319156, 235441, 319160, 244059, 319161, 209200, 326619, 319152, 19373, 100041230, 319157, 319158, 319149, 57741, 101685, 326620, 97908, 320332, 12479	800	122	16818	3.79094	0.000262115	4.36915e-05	4.24171e-05
KEGG_PATHWAY	mmu05203:Viral carcinogenesis	31	8.86324e-07	12370, 17246, 319155, 16195, 319156, 17164, 18034, 18035, 22059, 319157, 16391, 319158, 12914, 12575, 320332, 319187, 74769, 319188, 319160, 319161, 326619, 20848, 100041230, 17096, 79221, 20963, 234729, 58801, 252870, 319180, 326620	385	221	7453	2.71544	0.000227759	0.000228672	0.000212718
GOTERM_BP_DIRECT	GO:0006336~DNA replication-independent nucleosome assembly	10	1.2518e-06	319155, 319156, 319160, 319161, 326619, 100041230, 319157, 326620, 319158, 320332	820	25	17172	8.37659	0.00444897	0.000318493	0.000316257
GOTERM_BP_DIRECT	GO:0006352~DNA-templated transcription, initiation	11	4.72663e-06	319155, 319156, 319160, 319161, 326619, 226182, 100041230, 319157, 326620, 319158, 320332	820	36	17172	6.39878	0.0166954	0.000990369	0.000983418
GOTERM_CC_DIRECT	GO:0000784~nuclear chromosome, telomeric region	19	1.94079e-05	319153, 68147, 21951, 319155, 214498, 319156, 319160, 319161, 326619, 72400, 319152, 100041230, 319157, 99982, 319158, 319149, 326620, 97908, 320332	860	127	18756	3.26281	0.011136	0.00100625	0.000967882
KEGG_PATHWAY	mmu05322:Systemic lupus erythematosus	20	9.34615e-05	319153, 319187, 319188, 319155, 319156, 12262, 319160, 319161, 326619, 319152, 21926, 100041230, 319157, 319158, 319149, 319180, 12259, 326620, 97908, 320332	385	140	7453	2.76549	0.0237345	0.00344472	0.00320439
GOTERM_MF_DIRECT	GO:0019904~protein domain specific binding	28	0.000610145	67443, 319155, 15381, 319156, 12393, 18793, 319157, 319158, 15903, 30960, 268980, 216869, 234214, 12332, 320332, 13195, 235320, 319160, 319161, 326619, 100041230, 20963, 14409, 12606, 211586, 53975, 326620, 11810	800	288	16818	2.04385	0.443405	0.0418385	0.0406182
KEGG_PATHWAY	mmu05034:Alcoholism	22	0.000844306	319153, 13195, 319187, 319188, 319155, 319156, 319160, 242443, 319161, 326619, 319152, 100041230, 319157, 319158, 79221, 110877, 319149, 11540, 319180, 326620, 97908, 320332	385	192	7453	2.21815	0.195133	0.0155594	0.0144738
GOTERM_CC_DIRECT	GO:0031012~extracellular matrix	27	0.00102534	17387, 319155, 319156, 17381, 116847, 319157, 319158, 27207, 12317, 13629, 12816, 170721, 14115, 16854, 192176, 320332, 214766, 20720, 12461, 319160, 319161, 326619, 108153, 100041230, 16007, 14268, 326620	860	293	18756	2.00973	0.446738	0.0369763	0.0355664
Downregulated
Annotation Cluster 1	Enrichment Score: 14.009391356244839
Category	Term	Count	PValue	Genes	List Total	Pop Hits	Pop Total	Fold Enrichment	Bonferroni	Benjamini	FDR
GOTERM_CC_DIRECT	GO:0005929~cilium	64	1.37462e-22	69329, 75564, 56297, 76260, 81896, 110350, 78802, 320634, 103765, 217935, 237222, 72421, 73873, 15275, 73750, 74682, 71492, 26448, 20028, 225004, 234740, 77945, 18746, 71769, 11512, 19126, 51938, 241950, 216274, 66279, 72873, 286942, 213081, 75782, 74052, 195208, 53885, 544696, 102774, 381259, 620631, 19888, 231225, 67286, 271209, 71877, 380718, 67378, 68146, 213575, 72569, 216560, 19893, 101100,…	1120	257	18756	4.17032	7.51917e-20	3.75959e-20	3.6015e-20
GOTERM_BP_DIRECT	GO:0030030~cell projection organization	42	6.7044e-17	69329, 216274, 218232, 213081, 244608, 56297, 76260, 81896, 230872, 195208, 53885, 110350, 78802, 102774, 320634, 381259, 103765, 620631, 217935, 19888, 231225, 17921, 271209, 380718, 67378, 213575, 72569, 72421, 237222, 216560, 73873, 70300, 19893, 319845, 74682, 71492, 73293, 67590, 234740, 329795, 231214, 12589	1024	151	17172	4.66437	3.46057e-13	6.96588e-14	6.92565e-14
GOTERM_BP_DIRECT	GO:0060271~cilium morphogenesis	40	1.85744e-13	216274, 218232, 213081, 244608, 56297, 76260, 74052, 81896, 110350, 78802, 544696, 102774, 320634, 381259, 103765, 620631, 320277, 380718, 67378, 68146, 213575, 100503572, 72569, 72421, 237222, 216560, 73873, 70300, 101100, 19893, 319845, 74682, 71492, 68708, 67590, 234740, 329795, 52028, 231214, 12589	1024	170	17172	3.94577	5.78953e-10	1.44741e-10	1.43906e-10
GOTERM_CC_DIRECT	GO:0042995~cell projection	95	2.3123e-13	218756, 71448, 69329, 243312, 27205, 75564, 22157, 56297, 76260, 242669, 81896, 13527, 228003, 110350, 78802, 320634, 20370, 103765, 100972, 233865, 217935, 242235, 16400, 16565, 107589, 237222, 72421, 73873, 73750, 23970, 225115, 74682, 71492, 26448, 20028, 225004, 22283, 216618, 234740, 77945, 236848, 50769, 71769, 11512, 19126, 51938, 71820, 241950, 238021, 13385, 216274, 66279, 72873, 286942,…	1120	712	18756	2.23443	1.26499e-10	3.16206e-11	3.02911e-11
GOTERM_BP_DIRECT	GO:0042384~cilium assembly	34	5.24667e-13	216274, 213081, 244608, 56297, 76260, 81896, 110350, 78802, 102774, 320634, 381259, 103765, 620631, 380718, 67378, 68146, 213575, 100503572, 72569, 72421, 216560, 73873, 70300, 101100, 19893, 319845, 74682, 71492, 68708, 234740, 329795, 52028, 231214, 12589	1024	129	17172	4.41988	1.63546e-09	3.27077e-10	3.25188e-10
GOTERM_CC_DIRECT	GO:0036064~ciliary basal body	26	4.22928e-09	71820, 216274, 72873, 75782, 76260, 81896, 102774, 100972, 231225, 380718, 67378, 213575, 72569, 207175, 72421, 237222, 73873, 19893, 73750, 319845, 74682, 71492, 260305, 22283, 52028, 12589	1120	109	18756	3.99456	2.31341e-06	3.30488e-07	3.16592e-07
Annotation Cluster 2	Enrichment Score: 3.475279384296601
Category	Term	Count	PValue	Genes	List Total	Pop Hits	Pop Total	Fold Enrichment	Bonferroni	Benjamini	FDR
GOTERM_BP_DIRECT	GO:0061512~protein localization to cilium	9	1.56375e-05	81896, 544696, 102774, 213081, 319845, 56297, 52028, 74682, 74052	1024	21	17172	7.18694	0.0475736	0.00348157	0.00346147
GOTERM_BP_DIRECT	GO:0035721~intraciliary retrograde transport	6	0.000253718	81896, 110350, 213081, 52028, 74682, 74052	1024	11	17172	9.14702	0.546582	0.04652	0.0462514
GOTERM_CC_DIRECT	GO:0030991~intraciliary transport particle A	4	0.0094546	81896, 213081, 74682, 74052	1120	8	18756	8.37321	0.994463	0.161615	0.154819
Annotation Cluster 3	Enrichment Score: 3.167950509030137
Category	Term	Count	PValue	Genes	List Total	Pop Hits	Pop Total	Fold Enrichment	Bonferroni	Benjamini	FDR
GOTERM_BP_DIRECT	GO:0007602~phototransduction	12	3.24991e-09	14913, 57811, 14539, 212541, 19674, 107477, 12057, 14699, 333329, 14685, 73660, 14686	1024	20	17172	10.0617	1.01299e-05	1.44714e-06	1.43878e-06
GOTERM_BP_DIRECT	GO:0071482~cellular response to light stimulus	5	0.00196763	14539, 212541, 19893, 12057, 19888	1024	10	17172	8.38477	0.997843	0.227152	0.22584
GOTERM_MF_DIRECT	GO:0009881~photoreceptor activity	4	0.0164893	57811, 14539, 212541, 12057	962	10	16818	6.99293	1	0.94857	0.947702
GOTERM_BP_DIRECT	GO:0018298~protein-chromophore linkage	4	0.0242583	57811, 14539, 212541, 12057	1024	11	17172	6.09801	1	1	0.994544
GOTERM_MF_DIRECT	GO:0008020~G-protein coupled photoreceptor activity	3	0.0565418	14539, 212541, 12057	962	7	16818	7.49243	1	1	1
Annotation Cluster 4	Enrichment Score: 2.9584382377798177
Category	Term	Count	PValue	Genes	List Total	Pop Hits	Pop Total	Fold Enrichment	Bonferroni	Benjamini	FDR
KEGG_PATHWAY	mmu01130:Biosynthesis of antibiotics	25	0.000194719	110446, 18655, 23827, 109652, 239017, 235674, 72157, 56451, 27226, 13808, 13807, 11364, 100678, 66194, 17449, 113868, 12183, 18242, 21991, 15275, 57295, 16828, 11671, 11674, 18746	384	211	7453	2.29963	0.0482601	0.0153498	0.0147479
KEGG_PATHWAY	mmu01200:Carbon metabolism	17	0.000240782	110446, 18655, 21991, 239017, 100198, 15275, 56451, 13808, 13807, 11364, 17769, 11674, 104776, 17436, 100678, 18746, 17449	384	115	7453	2.86913	0.0593329	0.0153498	0.0147479
GOTERM_BP_DIRECT	GO:0006096~glycolytic process	9	0.000562976	12183, 18655, 13808, 21991, 18640, 15275, 13807, 11674, 18746	1024	33	17172	4.57351	0.827143	0.0923576	0.0918243
KEGG_PATHWAY	mmu00010:Glycolysis / Gluconeogenesis	11	0.00161867	12183, 16828, 18655, 13808, 21991, 72157, 15275, 13807, 11671, 11674, 18746	384	65	7453	3.28458	0.337328	0.0412761	0.0396574
KEGG_PATHWAY	mmu01230:Biosynthesis of amino acids	9	0.0377684	18655, 13808, 109652, 21991, 13807, 11674, 66194, 100678, 18746	384	75	7453	2.32906	0.999943	0.458616	0.440631
Annotation Cluster 5	Enrichment Score: 2.198162789553074
Category	Term	Count	PValue	Genes	List Total	Pop Hits	Pop Total	Fold Enrichment	Bonferroni	Benjamini	FDR
KEGG_PATHWAY	mmu00071:Fatty acid degradation	10	0.000748476	113868, 110446, 11370, 235674, 216739, 11364, 12894, 11671, 14081, 12896	384	49	7453	3.96099	0.173193	0.0315948	0.0303558
KEGG_PATHWAY	mmu01212:Fatty acid metabolism	10	0.0010121	113868, 110446, 11370, 235674, 216739, 11364, 12894, 54326, 14081, 12896	384	51	7453	3.80566	0.226788	0.0315948	0.0303558
KEGG_PATHWAY	mmu03320:PPAR signaling pathway	11	0.00752294	113868, 235674, 19013, 216739, 11364, 12894, 20183, 26458, 20280, 14081, 12896	384	80	7453	2.66872	0.853107	0.137025	0.131651
GOTERM_BP_DIRECT	GO:0006631~fatty acid metabolic process	18	0.0116831	113868, 74559, 11370, 235674, 19013, 19079, 56690, 26458, 64899, 14081, 83603, 216739, 11364, 12894, 54326, 64292, 18777, 12896	1024	156	17172	1.93495	1	0.791654	0.787083
KEGG_PATHWAY	mmu00280:Valine, leucine and isoleucine degradation	8	0.0216244	113868, 110446, 235674, 11364, 11671, 104776, 67041, 66948	384	55	7453	2.82311	0.996124	0.324366	0.311646
GOTERM_BP_DIRECT	GO:0006635~fatty acid beta-oxidation	7	0.0449506	113868, 110446, 11370, 235674, 11364, 12894, 26458	1024	44	17172	2.66788	1	1	0.994544
