# Supplementary material for: Nuclear NAD+-biosynthetic enzyme NMNAT1 facilitates development and early survival of retinal neurons
Source: eLife. 2021 Dec 8;10:e71185. doi: 10.7554/eLife.71185 (PMC8754432; doi:10.7554/eLife.71185)
Supplement: Figure 3—figure supplement 3—source data 1. [file elife-71185-fig3-figsupp3-data1.xlsx]

## Sheet: Sheet1
Figure 3 Supplement 3 Panel C: Pathway overrepresentation analysis of significantly changed genes in E18.5 KO (-/-) retinas
Upregulated
Annotation Cluster 1	Enrichment Score: 4.332528422216289
Category	Term	Count	PValue	Genes	List Total	Pop Hits	Pop Total	Fold Enrichment	Bonferroni	Benjamini	FDR
KEGG_PATHWAY	mmu05140:Leishmaniasis	9	1.35e-05	17970, 16409, 14131, 24088, 18035, 16414, 17969, 20846, 21898	131	64	7453	8.0006	0.00232584	0.000585	0.000515
KEGG_PATHWAY	mmu05152:Tuberculosis	13	5.28e-05	13040, 13033, 16784, 14131, 20846, 21898, 56644, 16409, 24088, 14127, 16414, 16985, 12475	131	176	7453	4.20233	0.00909607	0.0016366	0.00143908
KEGG_PATHWAY	mmu04145:Phagosome	12	0.000141	13040, 17970, 56644, 226421, 16409, 16784, 14131, 24088, 16414, 17969, 12475, 21898	131	166	7453	4.11276	0.0241753	0.00351601	0.00309166
Annotation Cluster 2	Enrichment Score: 4.281901915277685
Category	Term	Count	PValue	Genes	List Total	Pop Hits	Pop Total	Fold Enrichment	Bonferroni	Benjamini	FDR
GOTERM_BP_DIRECT	GO:0009617~response to bacterium	8	3.25e-07	22349, 66898, 24088, 17969, 12475, 20846, 18439, 21898	229	35	17172	17.1399	0.000535	8e-05	7.81e-05
GOTERM_MF_DIRECT	GO:0001530~lipopolysaccharide binding	6	5.88e-06	19204, 83433, 24088, 12475, 18439, 21898	230	20	16818	21.9365	0.00250732	0.00251047	0.00248695
GOTERM_BP_DIRECT	GO:0050715~positive regulation of cytokine secretion	3	0.0746254	24088, 12475, 18439	229	34	17172	6.61649	1	0.823327	0.803307
Annotation Cluster 3	Enrichment Score: 3.847249944634372
Category	Term	Count	PValue	Genes	List Total	Pop Hits	Pop Total	Fold Enrichment	Bonferroni	Benjamini	FDR
GOTERM_MF_DIRECT	GO:0001530~lipopolysaccharide binding	6	5.88e-06	19204, 83433, 24088, 12475, 18439, 21898	230	20	16818	21.9365	0.00250732	0.00251047	0.00248695
GOTERM_BP_DIRECT	GO:0071223~cellular response to lipoteichoic acid	4	0.000183	83433, 24088, 12475, 21898	229	9	17172	33.3275	0.259872	0.0160469	0.0156567
GOTERM_MF_DIRECT	GO:0070891~lipoteichoic acid binding	3	0.00267092	83433, 24088, 12475	230	6	16818	36.5609	0.680822	0.228096	0.22596
Annotation Cluster 4	Enrichment Score: 3.313177597419093
Category	Term	Count	PValue	Genes	List Total	Pop Hits	Pop Total	Fold Enrichment	Bonferroni	Benjamini	FDR
GOTERM_BP_DIRECT	GO:0002224~toll-like receptor signaling pathway	7	5.62e-08	17079, 142980, 54445, 24088, 170743, 12524, 21898	229	17	17172	30.877	9.24e-05	1.85e-05	1.8e-05
GOTERM_BP_DIRECT	GO:0001774~microglial cell activation	6	2.94e-06	13051, 142980, 11629, 24088, 170743, 21898	229	18	17172	24.9956	0.00482274	0.000483	0.000472
GOTERM_BP_DIRECT	GO:0032755~positive regulation of interleukin-6 production	8	4.08e-06	226421, 142980, 24088, 170743, 14127, 230073, 18439, 21898	229	50	17172	11.9979	0.00668616	0.00061	0.000595
GOTERM_BP_DIRECT	GO:0032722~positive regulation of chemokine production	6	5.2e-06	19106, 142980, 24088, 170743, 16859, 21898	229	20	17172	22.4961	0.00852376	0.000713	0.000696
KEGG_PATHWAY	mmu04620:Toll-like receptor signaling pathway	10	5.64e-05	142980, 20750, 24088, 18035, 170743, 12475, 20846, 12524, 21898, 20303	131	100	7453	5.68931	0.00971592	0.0016366	0.00143908
GOTERM_BP_DIRECT	GO:0050729~positive regulation of inflammatory response	7	0.000185	13040, 142980, 24088, 21817, 20305, 21898, 20303	229	63	17172	8.33188	0.262817	0.0160469	0.0156567
GOTERM_BP_DIRECT	GO:0032757~positive regulation of interleukin-8 production	5	0.000308	142980, 24088, 170743, 230073, 21898	229	25	17172	14.9974	0.397083	0.0229953	0.0224362
GOTERM_BP_DIRECT	GO:0007252~I-kappaB phosphorylation	4	0.000465	142980, 24088, 170743, 21898	229	12	17172	24.9956	0.53483	0.0296389	0.0289182
GOTERM_MF_DIRECT	GO:0004872~receptor activity	10	0.000545	245527, 17079, 142980, 14694, 24088, 170743, 71740, 16414, 18439, 21898	230	170	16818	4.30128	0.207688	0.109126	0.108103
GOTERM_BP_DIRECT	GO:0002755~MyD88-dependent toll-like receptor signaling pathway	4	0.00113845	24088, 170743, 279572, 21898	229	16	17172	18.7467	0.846463	0.0567499	0.05537
GOTERM_BP_DIRECT	GO:0002730~regulation of dendritic cell cytokine production	3	0.00170952	142980, 24088, 21898	229	5	17172	44.9921	0.940069	0.0760042	0.0741561
GOTERM_BP_DIRECT	GO:0042346~positive regulation of NF-kappaB import into nucleus	4	0.0019129	142980, 24088, 170743, 21898	229	19	17172	15.7867	0.957137	0.0828086	0.080795
GOTERM_BP_DIRECT	GO:0045359~positive regulation of interferon-beta biosynthetic process	3	0.00352749	142980, 170743, 21898	229	7	17172	32.1372	0.997011	0.126146	0.123079
GOTERM_BP_DIRECT	GO:0032728~positive regulation of interferon-beta production	4	0.00380518	142980, 24088, 230073, 21898	229	24	17172	12.4978	0.998111	0.130783	0.127603
GOTERM_BP_DIRECT	GO:0010628~positive regulation of gene expression	11	0.0301947	142980, 60599, 24088, 18793, 13653, 230073, 18591, 16859, 50887, 18439, 21898	229	378	17172	2.18216	1	0.570924	0.557041
GOTERM_BP_DIRECT	GO:0032735~positive regulation of interleukin-12 production	3	0.046292	142980, 24088, 21898	229	26	17172	8.65233	1	0.707836	0.690624
GOTERM_BP_DIRECT	GO:0071260~cellular response to mechanical stimulus	4	0.0828081	12649, 142980, 170743, 21898	229	77	17172	3.89542	1	0.878834	0.857464
GOTERM_MF_DIRECT	GO:0004888~transmembrane signaling receptor activity	8	0.139483	60504, 142980, 83433, 24088, 170743, 14127, 13733, 21898	230	315	16818	1.85706	1	1	0.992958
Downregulated
Annotation Cluster 1	Enrichment Score: 17.93769767201987
Category	Term	Count	PValue	Genes	List Total	Pop Hits	Pop Total	Fold Enrichment	Bonferroni	Benjamini	FDR
GOTERM_BP_DIRECT	GO:0007601~visual perception	31	1.16255e-23	244723, 19661, 19023, 19881, 217143, 17022, 12790, 24013, 75124, 22157, 20215, 114230, 14919, 78600, 54652, 12057, 271209, 18587, 18588, 19133, 19674, 74023, 110855, 243923, 22248, 20028, 170735, 225004, 77945, 14686, 30952	341	131	17172	11.9167	1.74616e-20	1.74616e-20	1.73686e-20
GOTERM_CC_DIRECT	GO:0001750~photoreceptor outer segment	22	2.56744e-20	19126, 18587, 19881, 19133, 216274, 12790, 19272, 24013, 22157, 243923, 20215, 20028, 170735, 225004, 54652, 12057, 14699, 11891, 14697, 14686, 30952, 271209	366	66	18756	17.082	7.47125e-18	7.47125e-18	7.03479e-18
GOTERM_BP_DIRECT	GO:0050896~response to stimulus	25	5.15221e-12	238384, 19023, 12790, 24013, 22157, 20215, 14919, 78600, 54652, 12057, 271209, 18587, 18588, 19674, 72961, 74023, 110855, 243923, 22248, 20028, 170735, 225004, 77945, 14686, 30952	341	211	17172	5.96656	7.73862e-09	3.86931e-09	3.8487e-09
Annotation Cluster 2	Enrichment Score: 3.434630840178106
Category	Term	Count	PValue	Genes	List Total	Pop Hits	Pop Total	Fold Enrichment	Bonferroni	Benjamini	FDR
GOTERM_CC_DIRECT	GO:0008021~synaptic vesicle	13	6.03216e-06	20698, 20972, 64176, 13385, 30948, 72961, 20508, 22348, 13429, 20908, 228355, 12752, 56807	366	125	18756	5.32957	0.00175382	0.000351072	0.000330562
GOTERM_BP_DIRECT	GO:0006836~neurotransmitter transport	6	0.00188524	64176, 20908, 72961, 20508, 102857, 22348	341	45	17172	6.71437	0.941241	0.217818	0.216658
KEGG_PATHWAY	mmu04721:Synaptic vesicle cycle	6	0.00436784	13429, 20908, 74325, 72961, 20508, 22348	131	62	7453	5.50579	0.522782	0.0825037	0.0791065
Annotation Cluster 3	Enrichment Score: 3.3322842808247137
Category	Term	Count	PValue	Genes	List Total	Pop Hits	Pop Total	Fold Enrichment	Bonferroni	Benjamini	FDR
GOTERM_MF_DIRECT	GO:0004114~3',5'-cyclic-nucleotide phosphodiesterase activity	6	8.09213e-05	18587, 18588, 78600, 18584, 218461, 110855	325	24	16818	12.9369	0.0427582	0.0366274	0.036356
GOTERM_MF_DIRECT	GO:0030553~cGMP binding	5	0.000204902	18588, 78600, 12790, 30952, 110855	325	16	16818	16.1712	0.104756	0.0366274	0.036356
GOTERM_MF_DIRECT	GO:0047555~3',5'-cyclic-GMP phosphodiesterase activity	4	0.000768813	18587, 18588, 78600, 110855	325	10	16818	20.6991	0.33987	0.0691932	0.0686807
KEGG_PATHWAY	mmu00230:Purine metabolism	10	0.00367649	11514, 18587, 18588, 14919, 78600, 109674, 18584, 23917, 218461, 110855	131	177	7453	3.2143	0.463383	0.0781253	0.0749084
