# Supplementary material for: Nuclear NAD+-biosynthetic enzyme NMNAT1 facilitates development and early survival of retinal neurons
Source: eLife. 2021 Dec 8;10:e71185. doi: 10.7554/eLife.71185 (PMC8754432; doi:10.7554/eLife.71185)
Supplement: Figure 3—figure supplement 4—source data 1. [file elife-71185-fig3-figsupp4-data1.xlsx]

## Sheet: Sheet1
Figure 3 Supplement 4 Panel A: Relative expression of bipolar cell-specific genes in E18.5 KO (-/-) retinas						Figure 3 Supplement 4 Panel D: Relative expression of bipolar cell-specific genes in P4 KO (-/-) retinas
Gene	Replicate 1	Replicate 2	Replicate 3	adjusted p-value (KO vs WT, DESeq2)		Gene	Replicate 1	Replicate 2	Replicate 3	Replicate 4	Replicate 5	adjusted p-value (KO vs WT, DESeq2)
Scgn	2.17286	1.9015	0.593672	0.851523		Scgn	0.0911886	0.163681	0.251076	0.485898	0.697229	0.0882172
Cabp5	0.373319	0.838418	0.687649	0.149663		Cabp5	0.52826	0.678059	0.523399	0.442031	0.562841	6.49e-10
Pcp2	0.708851	0.918922	0.776383	0.629007		Pcp2	0.98403	1.2801	1.11783	1.38103	0.88543	0.661514
Irx5	1.19489	1.01828	1.1866	0.367325		Irx5	1.5069	1.53462	1.3164	0.978335	0.97963	0.196754
Vsx2	1.01675	0.864858	0.975941	0.910408		Vsx2	1.17833	1.29882	1.2491	1.31628	1.37269	0.000276801
Prdm1	1.04597	1.01427	1.02216	0.949951		Prdm1	1.07265	1.06993	1.12116	1.01823	1.08446	0.346345
Figure 3 Supplement 4 Panel B: Relative expression of horizontal and amacrine cell-specific genes in E18.5 KO (-/-) retinas						Figure 3 Supplement 4 Panel E: Relative expression of horizontal and amacrine cell-specific genes in P4 KO (-/-) retinas
Gene	Replicate 1	Replicate 2	Replicate 3	adjusted p-value (KO vs WT, DESeq2)		Gene	Replicate 1	Replicate 2	Replicate 3	Replicate 4	Replicate 5	adjusted p-value (KO vs WT, DESeq2)
Lhx2	1.04594	0.866042	0.944189	0.904324		Lhx2	1.40581	1.54724	1.32408	0.993596	0.943939	0.340519
Prox1	1.22356	0.947366	1.01524	0.923601		Prox1	0.943761	1.04469	1.12103	1.11471	1.05509	0.814215
Calb2	0.774976	1.00136	1.05154	0.91536		Calb2	1.06115	1.11863	0.940962	1.10532	1.02609	0.615449
Foxn4	1.02103	0.85893	0.879392	0.714138		Foxn4	1.51136	1.68988	1.45835	0.783133	0.757251	0.591474
Ptf1a	0.874962	0.996097	0.965071	0.913986		Ptf1a	1.48676	1.28571	0.87017	0.611723	0.667242	0.975824
Tfap2a	0.667809	0.630752	0.665561	2.17e-17		Tfap2a	0.980772	1.21884	0.968262	0.902986	0.74174	0.877814
Figure 3 Supplement 4 Panel C: Relative expression of ganglion cell-specific genes in E18.5 KO (-/-) retinas						Figure 3 Supplement 4 Panel F: Relative expression of ganglion cell-specific genes in P4 KO (-/-) retinas
Gene	Replicate 1	Replicate 2	Replicate 3	adjusted p-value (KO vs WT, DESeq2)		Gene	Replicate 1	Replicate 2	Replicate 3	Replicate 4	Replicate 5	adjusted p-value (KO vs WT, DESeq2)
Ina	0.896227	0.848142	1.03395	0.830826		Ina	1.16565	1.50297	1.06334	1.04793	0.806368	0.658307
Gap43	0.810598	1.03693	1.01872	0.937129		Gap43	1.10732	1.22898	0.999501	1.06217	1.03025	0.463416
Nrp1	1.12196	1.22268	1.23645	0.142276		Nrp1	1.07165	1.10727	1.12463	1.06309	1.00785	0.280468
Pou4f1	0.871893	0.900439	1.17528	0.985332		Pou4f1	1.18729	1.46015	1.03541	1.11758	0.927101	0.45263
Pou4f2	0.964274	1.05233	1.28303	0.771621		Pou4f2	1.19562	1.6026	1.08131	1.07587	0.924304	0.435445
Pou4f3	0.804464	1.00587	0.968793	0.830971		Pou4f3	1.12606	1.30174	0.95097	1.06573	0.910052	0.711575
Sncg	0.79703	1.0369	0.98335	0.923552		Sncg	1.1413	1.26547	0.943886	1.08463	1.08908	0.373182
