# Supplementary material for: Nuclear NAD+-biosynthetic enzyme NMNAT1 facilitates development and early survival of retinal neurons
Source: eLife. 2021 Dec 8;10:e71185. doi: 10.7554/eLife.71185 (PMC8754432; doi:10.7554/eLife.71185)
Supplement: Figure 3—figure supplement 5—source data 1. [file elife-71185-fig3-figsupp5-data1.xlsx]

## Sheet: Sheet1
Figure 3 Supplement 5 Panel C: Relative expression of synapse-associated genes in P4 KO (-/-) retinas							Figure 3 Supplement 5 Panel D: Relative expression of synapse-associated genes in E18.5 KO (-/-) retinas
Gene	Replicate 1	Replicate 2	Replicate 3	Replicate 4	adjusted p-value (KO vs WT, DESeq2)		Gene	Replicate 1	Replicate 2	Replicate 3	adjusted p-value (KO vs WT, DESeq2)
Stx3	0.398784	0.50368	0.62574	0.692272	0.00074134		Stx3	0.628695	0.773584	0.769338	0.000635916
Syngr1	0.644939	0.655848	0.82407	0.727378	0.00561088		Syngr1	0.76999	0.80051	0.866668	0.00227012
Cln3	0.516077	0.561405	0.705213	0.686364	0.000561814		Cln3	0.596608	0.805055	0.684406	0.00739953
Cltb	0.748837	0.698755	0.709061	0.65915	5.93e-10		Cltb	0.693581	0.852131	0.796631	0.00415276
Scamp5	0.764756	0.754915	0.880532	0.814337	0.00610505		Scamp5	0.850768	0.876718	0.872153	0.0353493
Sv2b	0.584366	0.454203	0.52415	0.708595	0.000286953		Sv2b	0.750799	0.664762	0.653964	3.95e-08
