# Supplementary material for: Nuclear NAD+-biosynthetic enzyme NMNAT1 facilitates development and early survival of retinal neurons
Source: eLife. 2021 Dec 8;10:e71185. doi: 10.7554/eLife.71185 (PMC8754432; doi:10.7554/eLife.71185)
Supplement: Figure 3—source data 1. — Numerical source data for expression (relative to WT levels) of select photoreceptor-specific genes in E18.5 and P4 KO retinas. [file elife-71185-fig3-data1.xlsx]

## Sheet: Sheet1
Figure 3G: Gene ontology (GO) overrepresentation analysis of genes differentially expressed in KO retinas at both experimental timepoints (E18.5 and P4)															Figure 3H,I: Relative expression of select photoreceptor-specific genes in E18.5 and P4 KO (-/-) retinas
Annotation Cluster 1	Enrichment Score: 19.014376600421688
Category	Term	Count	%	PValue	Genes	List Total	Pop Hits	Pop Total	Fold Enrichment	Bonferroni	Benjamini	FDR			E18.5						P4
GOTERM_BP_DIRECT	GO:0007601~visual perception	29	9.09091	2.17011e-24	ENSMUSG00000029410, ENSMUSG00000009108, ENSMUSG00000058831, ENSMUSG00000056055, ENSMUSG00000031450, ENSMUSG00000056494, ENSMUSG00000024140, ENSMUSG00000021396, ENSMUSG00000041534, ENSMUSG00000002058, ENSMUSG00000046049, ENSMUSG00000023978, ENSMUSG00000045871, ENSMUSG00000060890, ENSMUSG00000020907, ENSMUSG00000056043, ENSMUSG00000057132, ENSMUSG00000031142, ENSMUSG00000049353, ENSMUSG00000024992,…	272	133	18082	14.4952	3.31159e-21	3.30942e-21	3.29857e-21				KO						KO
GOTERM_CC_DIRECT	GO:0001750~photoreceptor outer segment	21	6.58307	3.70476e-21	ENSMUSG00000032202, ENSMUSG00000029663, ENSMUSG00000009108, ENSMUSG00000058831, ENSMUSG00000056055, ENSMUSG00000056494, ENSMUSG00000031450, ENSMUSG00000056043, ENSMUSG00000029086, ENSMUSG00000031142, ENSMUSG00000026114, ENSMUSG00000032192, ENSMUSG00000006007, ENSMUSG00000029556, ENSMUSG00000046049, ENSMUSG00000023978, ENSMUSG00000019971, ENSMUSG00000044375, ENSMUSG00000060890, ENSMUSG00000071648,…	291	67	19662	21.1777	1.08549e-18	1.08549e-18	1.05956e-18			Gene	Replicate 1	Replicate 2	Replicate 3	adjusted p-value (KO vs WT, DESeq2)		Gene	Replicate 1	Replicate 2	Replicate 3	Replicate 4	Replicate 5	adjusted p-value (KO vs WT, DESeq2)
GOTERM_BP_DIRECT	GO:0050896~response to stimulus	24	7.52351	1.12623e-13	ENSMUSG00000029410, ENSMUSG00000009108, ENSMUSG00000058831, ENSMUSG00000056055, ENSMUSG00000056494, ENSMUSG00000031450, ENSMUSG00000056043, ENSMUSG00000057132, ENSMUSG00000031142, ENSMUSG00000049353, ENSMUSG00000024992, ENSMUSG00000026114, ENSMUSG00000070570, ENSMUSG00000025386, ENSMUSG00000020890, ENSMUSG00000006007, ENSMUSG00000002058, ENSMUSG00000046049, ENSMUSG00000041771, ENSMUSG00000044375,…	272	211	18082	7.56147	1.71792e-10	8.58751e-11	8.55936e-11			Aipl1	0.287923	0.563885	0.53808	1e-05		Aipl1	0.400679	0.429771	0.33589	0.436587	0.450968	6.65e-09
															Gucy2e	0.324537	0.657107	0.597874	0.020959		Gucy2e	0.38518	0.346683	0.371524	0.527179	0.560927	1.32e-06
Annotation Cluster 2	Enrichment Score: 2.0306223677495083														Prom1	0.663902	0.776859	0.75678	0.000155903		Prom1	0.526031	0.420433	0.534091	0.559719	0.82084	0.00710682
Category	Term	Count	%	PValue	Genes	List Total	Pop Hits	Pop Total	Fold Enrichment	Bonferroni	Benjamini	FDR			Prph2	0.320037	0.54538	0.512786	1e-08		Prph2	0.367923	0.332641	0.391804	0.536889	0.540505	6.42e-05
GOTERM_MF_DIRECT	GO:0070891~lipoteichoic acid binding	3	0.940439	0.00297685	ENSMUSG00000051439, ENSMUSG00000027995, ENSMUSG00000023992	252	6	17446	34.6151	0.780081	0.276436	0.275348			Rcvrn	0.177401	0.391099	0.315052	1.06e-08		Rcvrn	0.264973	0.279373	0.368404	0.359218	0.382563	2.08e-07
GOTERM_BP_DIRECT	GO:0071223~cellular response to lipoteichoic acid	3	0.940439	0.00751576	ENSMUSG00000051439, ENSMUSG00000027995, ENSMUSG00000023992	272	9	18082	22.1593	0.99999	0.64403	0.641918			Cep290	0.711664	0.846093	0.810927	0.0235812		Cep290	0.529105	0.447903	0.545233	0.644929	0.731181	0.000428877
GOTERM_MF_DIRECT	GO:0001530~lipopolysaccharide binding	3	0.940439	0.0361745	ENSMUSG00000051439, ENSMUSG00000027995, ENSMUSG00000023992	252	21	17446	9.89002	1	1	0.998028			Tulp1	0.448943	0.642305	0.508228	1.2e-07		Tulp1	0.447204	0.423486	0.470513	0.590684	0.569037	5.04e-06
															Grk1	0.397932	0.702233	0.516278	0.000155903		Grk1	0.278653	0.291601	0.32477	0.504755	0.449028	0.00368668
Annotation Cluster 3	Enrichment Score: 1.878136524891569														Rd3	0.427803	0.666551	0.576102	6.07e-05		Rd3	0.456693	0.398392	0.424077	0.606869	0.549112	0.000165817
Category	Term	Count	%	PValue	Genes	List Total	Pop Hits	Pop Total	Fold Enrichment	Bonferroni	Benjamini	FDR			Rpgrip1	0.67681	0.81225	0.85749	0.0493906		Rpgrip1	0.475317	0.428414	0.593335	0.642938	0.668439	0.000157633
KEGG_PATHWAY	mmu04724:Glutamatergic synapse	9	2.82132	0.000567389	ENSMUSG00000024935, ENSMUSG00000022092, ENSMUSG00000023439, ENSMUSG00000020886, ENSMUSG00000029663, ENSMUSG00000070570, ENSMUSG00000032192, ENSMUSG00000008932, ENSMUSG00000038811	127	115	7691	4.7394	0.102733	0.0363129	0.0342325			Impdh1	0.53676	0.611568	0.614687	1.59e-08		Impdh1	0.598862	0.597986	0.625716	0.734173	0.679749	0.000410652
KEGG_PATHWAY	mmu05032:Morphine addiction	8	2.50784	0.000790354	ENSMUSG00000033676, ENSMUSG00000023439, ENSMUSG00000029663, ENSMUSG00000032192, ENSMUSG00000023267, ENSMUSG00000021684, ENSMUSG00000060216, ENSMUSG00000038811	127	93	7691	5.20938	0.140167	0.037937	0.0357635			Gngt1	0.354436	0.70855	0.463655	0.000572244		Gngt1	0.313007	0.265974	0.333469	0.476811	0.527354	1.74e-05
KEGG_PATHWAY	mmu04723:Retrograde endocannabinoid signaling	8	2.50784	0.00144455	ENSMUSG00000033676, ENSMUSG00000023439, ENSMUSG00000029663, ENSMUSG00000031142, ENSMUSG00000070570, ENSMUSG00000032192, ENSMUSG00000023267, ENSMUSG00000038811	127	103	7691	4.70362	0.241269	0.0462256	0.0435773			Pde6g	0.190064	0.432901	0.366918	2.35e-08		Pde6g	0.337165	0.298399	0.336672	0.52676	0.523659	0.000107581
KEGG_PATHWAY	mmu04727:GABAergic synapse	7	2.19436	0.00293532	ENSMUSG00000033676, ENSMUSG00000023439, ENSMUSG00000029663, ENSMUSG00000031142, ENSMUSG00000032192, ENSMUSG00000023267, ENSMUSG00000038811	127	87	7691	4.87257	0.42963	0.0626201	0.0590325			Rom1	0.491731	0.712839	0.737758	0.00439668		Rom1	0.48543	0.410958	0.488497	0.629418	0.609383	0.000771309
KEGG_PATHWAY	mmu04713:Circadian entrainment	7	2.19436	0.00528983	ENSMUSG00000023439, ENSMUSG00000022416, ENSMUSG00000029663, ENSMUSG00000057897, ENSMUSG00000024112, ENSMUSG00000032192, ENSMUSG00000038811	127	98	7691	4.32565	0.636886	0.0902364	0.0850667			Sag	0.273036	0.609022	0.461284	4.46e-05		Sag	0.321946	0.265667	0.354707	0.488194	0.529244	3.98e-05
KEGG_PATHWAY	mmu04725:Cholinergic synapse	7	2.19436	0.0104185	ENSMUSG00000023439, ENSMUSG00000029663, ENSMUSG00000057897, ENSMUSG00000031142, ENSMUSG00000032192, ENSMUSG00000035200, ENSMUSG00000038811	127	113	7691	3.75145	0.864715	0.142882	0.134696			Pde6c	0.288415	0.576133	0.565365	6.07e-05		Pde6c	0.429547	0.50228	0.407399	0.297857	0.362815	1.85e-18
GOTERM_CC_DIRECT	GO:0005834~heterotrimeric G-protein complex	4	1.25392	0.0183112	ENSMUSG00000023439, ENSMUSG00000029663, ENSMUSG00000009108, ENSMUSG00000038811	291	38	19662	7.11232	0.99555	0.315598	0.308058			Opn1sw	0.208881	0.566058	0.42167	0.00400879		Opn1sw	0.417026	0.454502	0.449574	0.400091	0.419353	1.49e-23
KEGG_PATHWAY	mmu04726:Serotonergic synapse	6	1.88088	0.0652484	ENSMUSG00000033676, ENSMUSG00000023439, ENSMUSG00000029663, ENSMUSG00000031142, ENSMUSG00000032192, ENSMUSG00000038811	127	132	7691	2.75268	0.999997	0.404119	0.380967			Cnga3	0.375216	0.563197	0.504297	1.59e-10		Cnga3	0.502687	0.518676	0.475673	0.414624	0.437298	3.4e-32
KEGG_PATHWAY	mmu04728:Dopaminergic synapse	6	1.88088	0.0686715	ENSMUSG00000022092, ENSMUSG00000023439, ENSMUSG00000029663, ENSMUSG00000057897, ENSMUSG00000032192, ENSMUSG00000038811	127	134	7691	2.7116	0.999999	0.412029	0.388423			Cngb3	0.49272	0.717548	0.621526	3.51e-06		Cngb3	0.643761	0.623899	0.624273	0.574223	0.703881	3.6e-17
GOTERM_MF_DIRECT	GO:0003924~GTPase activity	7	2.19436	0.0824792	ENSMUSG00000032202, ENSMUSG00000026825, ENSMUSG00000023439, ENSMUSG00000029663, ENSMUSG00000009108, ENSMUSG00000033220, ENSMUSG00000038811	252	209	17446	2.31871	1	1	0.998028			Gnat2	0.32157	0.641267	0.501507	1.15e-05		Gnat2	0.461295	0.462745	0.441451	0.432839	0.456533	5.71e-37
KEGG_PATHWAY	mmu04014:Ras signaling pathway	7	2.19436	0.173037	ENSMUSG00000023439, ENSMUSG00000029663, ENSMUSG00000042826, ENSMUSG00000033220, ENSMUSG00000032192, ENSMUSG00000021708, ENSMUSG00000038811	127	229	7691	1.85115	1	0.772629	0.728364			Arr3	0.361564	0.375518	0.298477	1.22e-06		Arr3	0.187518	0.189553	0.315554	0.432647	0.354483	0.0026755
KEGG_PATHWAY	mmu05034:Alcoholism	6	1.88088	0.236309	ENSMUSG00000023439, ENSMUSG00000029663, ENSMUSG00000068854, ENSMUSG00000032192, ENSMUSG00000020178, ENSMUSG00000038811	127	202	7691	1.79878	1	0.883764	0.833132
Annotation Cluster 4	Enrichment Score: 1.1509416457887003
Category	Term	Count	%	PValue	Genes	List Total	Pop Hits	Pop Total	Fold Enrichment	Bonferroni	Benjamini	FDR
GOTERM_BP_DIRECT	GO:0007165~signal transduction	33	10.3448	0.00226954	ENSMUSG00000009108, ENSMUSG00000058831, ENSMUSG00000056055, ENSMUSG00000031450, ENSMUSG00000029055, ENSMUSG00000026786, ENSMUSG00000042228, ENSMUSG00000027995, ENSMUSG00000040229, ENSMUSG00000004730, ENSMUSG00000060216, ENSMUSG00000043398, ENSMUSG00000023439, ENSMUSG00000049928, ENSMUSG00000044583, ENSMUSG00000060890, ENSMUSG00000058715, ENSMUSG00000033777, ENSMUSG00000050511, ENSMUSG00000029641,…	272	1255	18082	1.74803	0.968797	0.31464	0.313609
GOTERM_MF_DIRECT	GO:0004871~signal transducer activity	18	5.64263	0.0128092	ENSMUSG00000029663, ENSMUSG00000009108, ENSMUSG00000058831, ENSMUSG00000081683, ENSMUSG00000029055, ENSMUSG00000032192, ENSMUSG00000040229, ENSMUSG00000040552, ENSMUSG00000020178, ENSMUSG00000004730, ENSMUSG00000043398, ENSMUSG00000023439, ENSMUSG00000049928, ENSMUSG00000035283, ENSMUSG00000030898, ENSMUSG00000037788, ENSMUSG00000050511, ENSMUSG00000038811	252	648	17446	1.92306	0.998569	0.769533	0.766503
GOTERM_BP_DIRECT	GO:0007186~G-protein coupled receptor signaling pathway	22	6.89655	0.856841	ENSMUSG00000029663, ENSMUSG00000009108, ENSMUSG00000058831, ENSMUSG00000033220, ENSMUSG00000081683, ENSMUSG00000032192, ENSMUSG00000040229, ENSMUSG00000026475, ENSMUSG00000040552, ENSMUSG00000020178, ENSMUSG00000004730, ENSMUSG00000060216, ENSMUSG00000043398, ENSMUSG00000023439, ENSMUSG00000068259, ENSMUSG00000049928, ENSMUSG00000035283, ENSMUSG00000030898, ENSMUSG00000018930, ENSMUSG00000050511,…	272	1706	18082	0.857277	1	1	0.997375
GOTERM_MF_DIRECT	GO:0004930~G-protein coupled receptor activity	12	3.76176	0.999707	ENSMUSG00000043398, ENSMUSG00000068259, ENSMUSG00000058831, ENSMUSG00000049928, ENSMUSG00000035283, ENSMUSG00000081683, ENSMUSG00000030898, ENSMUSG00000040229, ENSMUSG00000040552, ENSMUSG00000050511, ENSMUSG00000020178, ENSMUSG00000004730	252	1749	17446	0.474993	1	1	0.999707
Annotation Cluster 5	Enrichment Score: 1.1238000212480994
Category	Term	Count	%	PValue	Genes	List Total	Pop Hits	Pop Total	Fold Enrichment	Bonferroni	Benjamini	FDR
KEGG_PATHWAY	mmu04020:Calcium signaling pathway	8	2.50784	0.0281221	ENSMUSG00000022092, ENSMUSG00000022416, ENSMUSG00000057897, ENSMUSG00000035283, ENSMUSG00000031142, ENSMUSG00000024112, ENSMUSG00000030898, ENSMUSG00000020178	127	180	7691	2.69151	0.995696	0.275448	0.259667
GOTERM_CC_DIRECT	GO:0005891~voltage-gated calcium channel complex	3	0.940439	0.0483507	ENSMUSG00000022416, ENSMUSG00000031142, ENSMUSG00000024112	291	24	19662	8.44588	1	0.505956	0.493868
GOTERM_BP_DIRECT	GO:0086010~membrane depolarization during action potential	3	0.940439	0.0655449	ENSMUSG00000022416, ENSMUSG00000031142, ENSMUSG00000024112	272	28	18082	7.12264	1	1	0.997375
GOTERM_BP_DIRECT	GO:0006816~calcium ion transport	5	1.5674	0.161905	ENSMUSG00000041771, ENSMUSG00000022416, ENSMUSG00000057897, ENSMUSG00000031142, ENSMUSG00000024112	272	141	18082	2.35737	1	1	0.997375
KEGG_PATHWAY	mmu04925:Aldosterone synthesis and secretion	4	1.25392	0.166629	ENSMUSG00000022416, ENSMUSG00000057897, ENSMUSG00000031142, ENSMUSG00000024112	127	86	7691	2.8167	1	0.761733	0.718092
Annotation Cluster 6	Enrichment Score: 1.0679161603454979
Category	Term	Count	%	PValue	Genes	List Total	Pop Hits	Pop Total	Fold Enrichment	Bonferroni	Benjamini	FDR
KEGG_PATHWAY	mmu05200:Pathways in cancer	12	3.76176	0.058616	ENSMUSG00000023439, ENSMUSG00000029663, ENSMUSG00000042826, ENSMUSG00000033220, ENSMUSG00000081683, ENSMUSG00000024140, ENSMUSG00000015843, ENSMUSG00000032192, ENSMUSG00000023067, ENSMUSG00000002111, ENSMUSG00000021025, ENSMUSG00000038811	127	395	7691	1.83977	0.99999	0.404119	0.380967
KEGG_PATHWAY	mmu04151:PI3K-Akt signaling pathway	11	3.44828	0.0616733	ENSMUSG00000017344, ENSMUSG00000023439, ENSMUSG00000029663, ENSMUSG00000042826, ENSMUSG00000030748, ENSMUSG00000027995, ENSMUSG00000032192, ENSMUSG00000023067, ENSMUSG00000068758, ENSMUSG00000029304, ENSMUSG00000038811	127	351	7691	1.89786	0.999995	0.404119	0.380967
KEGG_PATHWAY	mmu04014:Ras signaling pathway	7	2.19436	0.173037	ENSMUSG00000023439, ENSMUSG00000029663, ENSMUSG00000042826, ENSMUSG00000033220, ENSMUSG00000032192, ENSMUSG00000021708, ENSMUSG00000038811	127	229	7691	1.85115	1	0.772629	0.728364
Annotation Cluster 7	Enrichment Score: 1.0630546193637425
Category	Term	Count	%	PValue	Genes	List Total	Pop Hits	Pop Total	Fold Enrichment	Bonferroni	Benjamini	FDR
KEGG_PATHWAY	mmu05134:Legionellosis	6	1.88088	0.00230948	ENSMUSG00000051439, ENSMUSG00000091971, ENSMUSG00000000290, ENSMUSG00000090877, ENSMUSG00000027995, ENSMUSG00000021025	127	57	7691	6.37464	0.357006	0.0626201	0.0590325
KEGG_PATHWAY	mmu05162:Measles	5	1.5674	0.183503	ENSMUSG00000044583, ENSMUSG00000091971, ENSMUSG00000090877, ENSMUSG00000027995, ENSMUSG00000021025	127	136	7691	2.22644	1	0.80074	0.754865
KEGG_PATHWAY	mmu05145:Toxoplasmosis	4	1.25392	0.246945	ENSMUSG00000091971, ENSMUSG00000090877, ENSMUSG00000027995, ENSMUSG00000021025	127	105	7691	2.30701	1	0.894594	0.843342
KEGG_PATHWAY	mmu05164:Influenza A	4	1.25392	0.534594	ENSMUSG00000044583, ENSMUSG00000091971, ENSMUSG00000090877, ENSMUSG00000021025	127	171	7691	1.41659	1	1	0.947644
Annotation Cluster 8	Enrichment Score: 1.0567164067980042
Category	Term	Count	%	PValue	Genes	List Total	Pop Hits	Pop Total	Fold Enrichment	Bonferroni	Benjamini	FDR
GOTERM_MF_DIRECT	GO:0004896~cytokine receptor activity	4	1.25392	0.0267946	ENSMUSG00000020279, ENSMUSG00000018341, ENSMUSG00000030748, ENSMUSG00000068758	252	45	17446	6.15379	0.999999	1	0.998028
KEGG_PATHWAY	mmu04640:Hematopoietic cell lineage	5	1.5674	0.0504075	ENSMUSG00000020279, ENSMUSG00000051439, ENSMUSG00000030748, ENSMUSG00000023274, ENSMUSG00000068758	127	85	7691	3.5623	0.999949	0.38713	0.36495
KEGG_PATHWAY	mmu04060:Cytokine-cytokine receptor interaction	7	2.19436	0.205387	ENSMUSG00000020279, ENSMUSG00000018341, ENSMUSG00000030748, ENSMUSG00000018930, ENSMUSG00000068758, ENSMUSG00000034457, ENSMUSG00000035678	127	242	7691	1.75171	1	0.855063	0.806075
KEGG_PATHWAY	mmu04630:Jak-STAT signaling pathway	5	1.5674	0.213806	ENSMUSG00000020279, ENSMUSG00000028101, ENSMUSG00000018341, ENSMUSG00000030748, ENSMUSG00000068758	127	145	7691	2.08824	1	0.855223	0.806226
Annotation Cluster 9	Enrichment Score: 0.9890171641900224
Category	Term	Count	%	PValue	Genes	List Total	Pop Hits	Pop Total	Fold Enrichment	Bonferroni	Benjamini	FDR
GOTERM_CC_DIRECT	GO:0043204~perikaryon	7	2.19436	0.0240062	ENSMUSG00000027827, ENSMUSG00000017740, ENSMUSG00000057897, ENSMUSG00000031142, ENSMUSG00000024112, ENSMUSG00000026114, ENSMUSG00000024397	291	150	19662	3.15313	0.999191	0.370201	0.361357
GOTERM_BP_DIRECT	GO:0055085~transmembrane transport	11	3.44828	0.0483645	ENSMUSG00000027827, ENSMUSG00000017740, ENSMUSG00000041771, ENSMUSG00000053025, ENSMUSG00000031142, ENSMUSG00000047298, ENSMUSG00000055782, ENSMUSG00000024112, ENSMUSG00000026114, ENSMUSG00000070570, ENSMUSG00000002346	272	364	18082	2.00895	1	1	0.997375
GOTERM_MF_DIRECT	GO:0005216~ion channel activity	6	1.88088	0.0976585	ENSMUSG00000033676, ENSMUSG00000031142, ENSMUSG00000047298, ENSMUSG00000024112, ENSMUSG00000026114, ENSMUSG00000035200	252	170	17446	2.44342	1	1	0.998028
GOTERM_MF_DIRECT	GO:0005244~voltage-gated ion channel activity	4	1.25392	0.303576	ENSMUSG00000027827, ENSMUSG00000031142, ENSMUSG00000047298, ENSMUSG00000024112	252	134	17446	2.06657	1	1	0.998028
GOTERM_BP_DIRECT	GO:0034765~regulation of ion transmembrane transport	4	1.25392	0.329675	ENSMUSG00000027827, ENSMUSG00000031142, ENSMUSG00000047298, ENSMUSG00000024112	272	135	18082	1.96972	1	1	0.997375
Annotation Cluster 10	Enrichment Score: 0.9628892936576136
Category	Term	Count	%	PValue	Genes	List Total	Pop Hits	Pop Total	Fold Enrichment	Bonferroni	Benjamini	FDR
KEGG_PATHWAY	mmu04142:Lysosome	6	1.88088	0.0496182	ENSMUSG00000047547, ENSMUSG00000021665, ENSMUSG00000028581, ENSMUSG00000018774, ENSMUSG00000030720, ENSMUSG00000016256	127	122	7691	2.97831	0.99994	0.38713	0.36495
GOTERM_CC_DIRECT	GO:0005764~lysosome	10	3.1348	0.057369	ENSMUSG00000032202, ENSMUSG00000021665, ENSMUSG00000024737, ENSMUSG00000028581, ENSMUSG00000018774, ENSMUSG00000044583, ENSMUSG00000052688, ENSMUSG00000029826, ENSMUSG00000030720, ENSMUSG00000016256	291	331	19662	2.0413	1	0.534621	0.521848
GOTERM_CC_DIRECT	GO:0005765~lysosomal membrane	5	1.5674	0.453957	ENSMUSG00000034854, ENSMUSG00000024737, ENSMUSG00000028581, ENSMUSG00000018774, ENSMUSG00000030720	291	234	19662	1.44374	1	1	0.979452
Annotation Cluster 11	Enrichment Score: 0.798900327038669
Category	Term	Count	%	PValue	Genes	List Total	Pop Hits	Pop Total	Fold Enrichment	Bonferroni	Benjamini	FDR
GOTERM_BP_DIRECT	GO:0006821~chloride transport	4	1.25392	0.118579	ENSMUSG00000033676, ENSMUSG00000017740, ENSMUSG00000038115, ENSMUSG00000023267	272	80	18082	3.3239	1	1	0.997375
GOTERM_CC_DIRECT	GO:0034707~chloride channel complex	3	0.940439	0.147384	ENSMUSG00000033676, ENSMUSG00000038115, ENSMUSG00000023267	291	46	19662	4.40654	1	0.863671	0.843037
GOTERM_MF_DIRECT	GO:0005254~chloride channel activity	3	0.940439	0.22953	ENSMUSG00000033676, ENSMUSG00000038115, ENSMUSG00000023267	252	63	17446	3.29667	1	1	0.998028
Annotation Cluster 12	Enrichment Score: 0.5133398133997034
Category	Term	Count	%	PValue	Genes	List Total	Pop Hits	Pop Total	Fold Enrichment	Bonferroni	Benjamini	FDR
GOTERM_BP_DIRECT	GO:0006366~transcription from RNA polymerase II promoter	6	1.88088	0.0569046	ENSMUSG00000024406, ENSMUSG00000038418, ENSMUSG00000052837, ENSMUSG00000029556, ENSMUSG00000024565, ENSMUSG00000060216	272	138	18082	2.89035	1	1	0.997375
GOTERM_MF_DIRECT	GO:0043565~sequence-specific DNA binding	15	4.70219	0.0743953	ENSMUSG00000038418, ENSMUSG00000024140, ENSMUSG00000032292, ENSMUSG00000048249, ENSMUSG00000002111, ENSMUSG00000029556, ENSMUSG00000024565, ENSMUSG00000040632, ENSMUSG00000024406, ENSMUSG00000025408, ENSMUSG00000041583, ENSMUSG00000052837, ENSMUSG00000021779, ENSMUSG00000015843, ENSMUSG00000019878	252	633	17446	1.64053	1	1	0.998028
GOTERM_BP_DIRECT	GO:0000122~negative regulation of transcription from RNA polymerase II promoter	17	5.32915	0.0834954	ENSMUSG00000038418, ENSMUSG00000024140, ENSMUSG00000032292, ENSMUSG00000096351, ENSMUSG00000048249, ENSMUSG00000002111, ENSMUSG00000029556, ENSMUSG00000036181, ENSMUSG00000024406, ENSMUSG00000025408, ENSMUSG00000022941, ENSMUSG00000052837, ENSMUSG00000021779, ENSMUSG00000047034, ENSMUSG00000039661, ENSMUSG00000053411, ENSMUSG00000056537	272	729	18082	1.55024	1	1	0.997375
GOTERM_MF_DIRECT	GO:0001077~transcriptional activator activity, RNA polymerase II core promoter proximal region sequence-specific binding	8	2.50784	0.0958934	ENSMUSG00000024406, ENSMUSG00000025408, ENSMUSG00000038418, ENSMUSG00000052837, ENSMUSG00000024140, ENSMUSG00000002111, ENSMUSG00000029556, ENSMUSG00000040632	252	270	17446	2.05126	1	1	0.998028
GOTERM_MF_DIRECT	GO:0000976~transcription regulatory region sequence-specific DNA binding	3	0.940439	0.177045	ENSMUSG00000024406, ENSMUSG00000025408, ENSMUSG00000038418	252	53	17446	3.91869	1	1	0.998028
GOTERM_MF_DIRECT	GO:0044212~transcription regulatory region DNA binding	6	1.88088	0.245184	ENSMUSG00000024406, ENSMUSG00000025408, ENSMUSG00000038418, ENSMUSG00000051159, ENSMUSG00000029556, ENSMUSG00000024565	252	233	17446	1.78275	1	1	0.998028
GOTERM_MF_DIRECT	GO:0003690~double-stranded DNA binding	4	1.25392	0.311443	ENSMUSG00000038418, ENSMUSG00000052837, ENSMUSG00000021779, ENSMUSG00000029556	252	136	17446	2.03618	1	1	0.998028
GOTERM_CC_DIRECT	GO:0005667~transcription factor complex	6	1.88088	0.359453	ENSMUSG00000024406, ENSMUSG00000052837, ENSMUSG00000024140, ENSMUSG00000032292, ENSMUSG00000002111, ENSMUSG00000029556	291	267	19662	1.51836	1	1	0.979452
GOTERM_MF_DIRECT	GO:0003700~transcription factor activity, sequence-specific DNA binding	15	4.70219	0.394565	ENSMUSG00000038418, ENSMUSG00000024140, ENSMUSG00000032292, ENSMUSG00000048249, ENSMUSG00000002111, ENSMUSG00000029556, ENSMUSG00000024565, ENSMUSG00000040632, ENSMUSG00000024406, ENSMUSG00000025408, ENSMUSG00000052837, ENSMUSG00000021779, ENSMUSG00000051159, ENSMUSG00000015843, ENSMUSG00000019878	252	883	17446	1.17605	1	1	0.998028
GOTERM_MF_DIRECT	GO:0008134~transcription factor binding	6	1.88088	0.548299	ENSMUSG00000024406, ENSMUSG00000025408, ENSMUSG00000038418, ENSMUSG00000052837, ENSMUSG00000024140, ENSMUSG00000029556	252	342	17446	1.21456	1	1	0.998028
GOTERM_MF_DIRECT	GO:0000978~RNA polymerase II core promoter proximal region sequence-specific DNA binding	6	1.88088	0.591444	ENSMUSG00000024406, ENSMUSG00000025408, ENSMUSG00000052837, ENSMUSG00000002111, ENSMUSG00000029556, ENSMUSG00000040632	252	359	17446	1.15705	1	1	0.998028
GOTERM_BP_DIRECT	GO:0045944~positive regulation of transcription from RNA polymerase II promoter	15	4.70219	0.63501	ENSMUSG00000038418, ENSMUSG00000024140, ENSMUSG00000032292, ENSMUSG00000027995, ENSMUSG00000002111, ENSMUSG00000029556, ENSMUSG00000021025, ENSMUSG00000040632, ENSMUSG00000021665, ENSMUSG00000024406, ENSMUSG00000025408, ENSMUSG00000052837, ENSMUSG00000021779, ENSMUSG00000015843, ENSMUSG00000019878	272	995	18082	1.00218	1	1	0.997375
GOTERM_BP_DIRECT	GO:0045893~positive regulation of transcription, DNA-templated	8	2.50784	0.764076	ENSMUSG00000024406, ENSMUSG00000025408, ENSMUSG00000038418, ENSMUSG00000019971, ENSMUSG00000051159, ENSMUSG00000002111, ENSMUSG00000029556, ENSMUSG00000021025	272	576	18082	0.923305	1	1	0.997375
GOTERM_BP_DIRECT	GO:0006355~regulation of transcription, DNA-templated	31	9.71787	0.803172	ENSMUSG00000055027, ENSMUSG00000028101, ENSMUSG00000024140, ENSMUSG00000003585, ENSMUSG00000002111, ENSMUSG00000029556, ENSMUSG00000024565, ENSMUSG00000024406, ENSMUSG00000022941, ENSMUSG00000052837, ENSMUSG00000018554, ENSMUSG00000021779, ENSMUSG00000015843, ENSMUSG00000056537, ENSMUSG00000038418, ENSMUSG00000029641, ENSMUSG00000032131, ENSMUSG00000030350, ENSMUSG00000032292, ENSMUSG00000048249,…	272	2279	18082	0.904263	1	1	0.997375
GOTERM_BP_DIRECT	GO:0006351~transcription, DNA-templated	25	7.83699	0.828917	ENSMUSG00000055027, ENSMUSG00000028101, ENSMUSG00000024140, ENSMUSG00000003585, ENSMUSG00000002111, ENSMUSG00000029556, ENSMUSG00000024565, ENSMUSG00000024406, ENSMUSG00000022941, ENSMUSG00000052837, ENSMUSG00000021779, ENSMUSG00000015843, ENSMUSG00000056537, ENSMUSG00000038418, ENSMUSG00000029641, ENSMUSG00000032292, ENSMUSG00000048249, ENSMUSG00000040632, ENSMUSG00000025408, ENSMUSG00000019971,…	272	1885	18082	0.88167	1	1	0.997375
GOTERM_MF_DIRECT	GO:0003677~DNA binding	22	6.89655	0.89854	ENSMUSG00000038418, ENSMUSG00000055027, ENSMUSG00000024140, ENSMUSG00000003500, ENSMUSG00000032292, ENSMUSG00000026107, ENSMUSG00000002111, ENSMUSG00000029556, ENSMUSG00000024565, ENSMUSG00000027514, ENSMUSG00000040632, ENSMUSG00000036181, ENSMUSG00000024406, ENSMUSG00000025408, ENSMUSG00000018554, ENSMUSG00000052837, ENSMUSG00000068854, ENSMUSG00000021779, ENSMUSG00000045440, ENSMUSG00000015843,…	252	1847	17446	0.824615	1	1	0.998028
Annotation Cluster 13	Enrichment Score: 0.2766109814287195
Category	Term	Count	%	PValue	Genes	List Total	Pop Hits	Pop Total	Fold Enrichment	Bonferroni	Benjamini	FDR
GOTERM_BP_DIRECT	GO:0010466~negative regulation of peptidase activity	3	0.940439	0.525651	ENSMUSG00000026715, ENSMUSG00000026249, ENSMUSG00000027315	272	117	18082	1.70456	1	1	0.997375
GOTERM_MF_DIRECT	GO:0004867~serine-type endopeptidase inhibitor activity	3	0.940439	0.530561	ENSMUSG00000026715, ENSMUSG00000026249, ENSMUSG00000027315	252	123	17446	1.68854	1	1	0.998028
GOTERM_MF_DIRECT	GO:0030414~peptidase inhibitor activity	3	0.940439	0.530561	ENSMUSG00000026715, ENSMUSG00000026249, ENSMUSG00000027315	252	123	17446	1.68854	1	1	0.998028
Annotation Cluster 14	Enrichment Score: 0.1749184298517446
Category	Term	Count	%	PValue	Genes	List Total	Pop Hits	Pop Total	Fold Enrichment	Bonferroni	Benjamini	FDR
GOTERM_CC_DIRECT	GO:0005913~cell-cell adherens junction	6	1.88088	0.499452	ENSMUSG00000091971, ENSMUSG00000042228, ENSMUSG00000023043, ENSMUSG00000026860, ENSMUSG00000029826, ENSMUSG00000006411	291	316	19662	1.28292	1	1	0.979452
GOTERM_MF_DIRECT	GO:0098641~cadherin binding involved in cell-cell adhesion	4	1.25392	0.768418	ENSMUSG00000091971, ENSMUSG00000023043, ENSMUSG00000026860, ENSMUSG00000029826	252	279	17446	0.992547	1	1	0.998028
GOTERM_BP_DIRECT	GO:0098609~cell-cell adhesion	3	0.940439	0.778312	ENSMUSG00000091971, ENSMUSG00000026860, ENSMUSG00000029826	272	189	18082	1.05521	1	1	0.997375
Annotation Cluster 15	Enrichment Score: 0.054414805586862
Category	Term	Count	%	PValue	Genes	List Total	Pop Hits	Pop Total	Fold Enrichment	Bonferroni	Benjamini	FDR
GOTERM_MF_DIRECT	GO:0016301~kinase activity	9	2.82132	0.758375	ENSMUSG00000026409, ENSMUSG00000057897, ENSMUSG00000025175, ENSMUSG00000046223, ENSMUSG00000031450, ENSMUSG00000028876, ENSMUSG00000042228, ENSMUSG00000030579, ENSMUSG00000020451	252	674	17446	0.924438	1	1	0.998028
GOTERM_BP_DIRECT	GO:0046777~protein autophosphorylation	3	0.940439	0.762856	ENSMUSG00000057897, ENSMUSG00000031450, ENSMUSG00000042228	272	183	18082	1.0898	1	1	0.997375
GOTERM_MF_DIRECT	GO:0004672~protein kinase activity	6	1.88088	0.883375	ENSMUSG00000057897, ENSMUSG00000031450, ENSMUSG00000028876, ENSMUSG00000042228, ENSMUSG00000020890, ENSMUSG00000020451	252	531	17446	0.782262	1	1	0.998028
GOTERM_MF_DIRECT	GO:0005524~ATP binding	17	5.32915	0.924268	ENSMUSG00000057897, ENSMUSG00000031450, ENSMUSG00000032131, ENSMUSG00000055782, ENSMUSG00000028876, ENSMUSG00000042228, ENSMUSG00000024300, ENSMUSG00000025420, ENSMUSG00000020890, ENSMUSG00000020451, ENSMUSG00000041642, ENSMUSG00000026409, ENSMUSG00000091971, ENSMUSG00000010021, ENSMUSG00000090877, ENSMUSG00000020908, ENSMUSG00000055415	252	1507	17446	0.780964	1	1	0.998028
GOTERM_BP_DIRECT	GO:0006468~protein phosphorylation	6	1.88088	0.935754	ENSMUSG00000057897, ENSMUSG00000031450, ENSMUSG00000028876, ENSMUSG00000042228, ENSMUSG00000020890, ENSMUSG00000020451	272	576	18082	0.692479	1	1	0.997375
GOTERM_BP_DIRECT	GO:0016310~phosphorylation	6	1.88088	0.954404	ENSMUSG00000057897, ENSMUSG00000025175, ENSMUSG00000031450, ENSMUSG00000028876, ENSMUSG00000042228, ENSMUSG00000020451	272	612	18082	0.651745	1	1	0.997375
GOTERM_MF_DIRECT	GO:0004674~protein serine/threonine kinase activity	3	0.940439	0.986127	ENSMUSG00000057897, ENSMUSG00000031450, ENSMUSG00000020451	252	428	17446	0.485258	1	1	0.998028
