# Supplementary material for: Nuclear NAD+-biosynthetic enzyme NMNAT1 facilitates development and early survival of retinal neurons
Source: eLife. 2021 Dec 8;10:e71185. doi: 10.7554/eLife.71185 (PMC8754432; doi:10.7554/eLife.71185)
Supplement: Figure 4—figure supplement 1—source data 1. — Numerical source data for relative abundance of cyclic ADP-ribose (cADPR) in E18.5 WT and KO retinas. [file elife-71185-fig4-figsupp1-data1.xlsx]

## Sheet: Sheet1
Figure 4 Supplement 1 Panels A-D: Relative expression of cell death-related genes in E18.5 KO (-/-) retinas							Figure 4 Supplement 1 Panel E: Relative abundance of cyclic ADP-ribose (cADPR) in E18.5 KO (-/-) retinas
								WT			KO
Gene	Replicate 1	Replicate 2	Replicate 3	adjusted p-value (KO vs WT, DESeq2)				Replicate 1	Replicate 2	Replicate 3	Replicate 1	Replicate 2	Replicate 3	p-value (KO vs WT, unpaired t-test)
Noxa	1.66504	2.15827	2.22568	0.00301102			cADPR	0.723201	1.04228	1.23452	1.67989	1.10362	1.33571	0.1714
Chop	0.721695	0.862614	0.809808	0.0353493
Nlrp3	3.96121	3.5763	3.72434	0.0613523
Tlr4	7.89102	5.63883	2.73645	0.00479146
Tlr2	2.42571	1.91137	1.69979	1.18324e-05
Nox2	7.03493	7.33079	4.58418	0.00223178
Sarm1	0.742819	1.10969	1.15609	0.999038
