# Supplementary material for: Nuclear NAD+-biosynthetic enzyme NMNAT1 facilitates development and early survival of retinal neurons
Source: eLife. 2021 Dec 8;10:e71185. doi: 10.7554/eLife.71185 (PMC8754432; doi:10.7554/eLife.71185)
Supplement: Figure 4—figure supplement 2—source data 1. [file elife-71185-fig4-figsupp2-data1.xlsx]

## Sheet: Sheet1
Figure 4 Supplement 2: Relative expression of cell death pathway genes in P4 WT (+/+) and KO (-/-) retinas
	WT					KO
Gene	Replicate 1	Replicate 2	Replicate 3	Replicate 4	Replicate 5	Replicate 1	Replicate 2	Replicate 3	Replicate 4	Replicate 5	adjusted p-value (KO vs WT, DESeq2)
Trp53 (p53)	0.111873	-0.0487776	0.00553378	0.158734	-0.26454	0.159348	0.448762	0.34383	0.292313	0.160654	0.0389274
Bnip3	-0.198394	0.178262	-0.128983	-0.112492	0.211006	-0.377153	-0.723908	-0.544182	-0.766577	-0.61998	9.57e-06
Bcl2l11 (Bim)	0.0467918	0.0442387	-0.0287185	0.0657242	-0.137656	0.330351	0.403985	0.339291	0.180232	0.231518	0.00053544
Bad	-0.31378	-0.33604	0.28034	0.395134	-0.194775	-0.339445	-0.118127	0.0759791	-0.155381	-0.0804782	0.000286022
Casp8	0.00017003	0.46058	0.139132	-0.354355	-0.433769	0.682094	0.263691	0.700269	0.399793	0.638997	0.0253043
Noxa	0.143106	0.501631	-0.303538	-0.241745	-0.27942	0.851541	0.408716	0.506243	0.439719	0.941673	0.0191792
Cflar (Flip)	0.00633871	-0.0717583	-0.130681	0.1282	0.0535135	-0.30384	-0.276771	-0.362573	-0.246769	-0.129188	0.00547742
Ddit3 (Chop)	-0.159335	-0.239719	0.0392721	0.143017	0.171008	-0.304244	-0.275104	-0.297192	-0.254406	-0.35278	0.0176281
Htra2	-0.150245	0.0754966	0.00833678	0.0742555	-0.0195123	-0.268161	-0.308408	-0.382288	-0.250768	-0.234908	0.000286022
Dyrk1a	0.15343	-0.0626422	0.121472	-0.0073667	-0.238665	0.26706	0.437411	0.421636	0.352819	0.29001	0.00121237
Bbc3 (Puma)	-0.0084531	-0.245649	0.147912	0.037882	0.0396096	0.458532	0.726709	0.0332845	0.390055	0.0785168	0.0842185
Bak1	0.0682105	-0.0193377	0.125622	-0.144149	-0.04542	0.164083	0.311999	0.0290671	0.29889	0.149232	0.110907
Bax	-0.0334404	0.102627	-0.172762	-0.107155	0.180944	0.259008	-0.056615	-0.114097	0.221711	-0.0780147	0.816477
Bcl2	0.255701	0.319007	0.172581	-0.285152	-0.711029	0.27653	0.462341	0.370218	-0.147972	-0.0207176	0.594503
Bid	-0.131013	0.0838138	-0.0445378	-0.103219	0.17177	0.0403824	-0.168538	-0.0777846	0.0759139	0.0105566	0.919622
Casp2	-0.0434579	0.104468	0.0529032	-0.151843	0.024497	0.264358	0.179203	0.169024	0.0685538	0.130866	0.0989561
Casp3	-0.0540092	-0.075352	-0.0669744	0.0496274	0.134876	0.00053377	-0.0023795	-0.0553593	-0.205872	-0.0636907	0.63416
Casp6	0.00172706	0.00098786	0.0451698	-0.118144	0.0634211	0.240632	0.189791	0.171871	0.0501622	0.133827	0.0641495
Casp7	0.390273	0.04491	0.343211	-1.31336	-0.0191983	0.268827	-1.16505	0.198069	0.00620691	0.0803033	0.9562
Casp9	0.12273	0.1088	0.117068	0.131565	-0.615142	0.074057	0.13639	0.10152	0.0934055	0.0162536	0.774851
Apaf1	0.193547	0.0476654	-0.0270496	0.0321539	-0.288287	0.237185	0.286836	0.309595	0.0230779	0.0105985	0.312921
Fadd	0.102223	0.190128	0.00449384	-0.0118279	-0.338699	0.142264	0.142004	0.341388	-0.103237	-0.102111	0.721953
Tnfrsf10b (Trailr2)	0.0637112	1.10745	-1.10436	-0.554919	-0.611755	-0.560616	-0.227402	-0.148512	0.192846	0.128943	0.910823
Hrk	0.0198158	-0.368839	-0.102779	0.25456	0.121089	-0.0686873	0.454585	-0.463328	-0.257474	-0.122676	0.889435
Mapk10 (Jnk)	0.100993	-0.0829999	-0.0443711	-0.0651932	0.0811573	-0.0704674	0.0721282	-0.0276398	0.0841682	0.0417121	0.884018
Fos	-0.296263	-0.39532	-0.111425	0.357607	0.284927	-0.391572	-0.156929	-0.523928	0.0766892	0.192921	0.743824
Jun	0.0825478	-0.320405	0.19022	0.178257	-0.20454	0.211154	0.326548	-0.0022104	0.0707274	-0.175295	0.724677
Atf4	-0.67977	0.374219	-0.622806	0.67056	-0.254117	-0.645223	-0.788121	-0.746629	-0.530368	-0.541053	0.0557576
Tradd	0.0355524	-0.0168978	0.010413	0.0687276	-0.103674	0.372981	0.341971	0.0556294	0.329862	0.0432912	0.0898851
Ptpn13 (Fap1)	0.198254	0.0950317	0.102588	-0.125197	-0.332744	0.252189	0.497988	0.28801	0.0658755	0.0661841	0.224057
Gadd45a	0.117832	-0.149519	0.00893841	-0.207771	0.190624	-0.0169499	0.111312	-0.226491	-0.111829	-0.10056	0.770373
Birc3 (Miap-1)	-0.471243	0.736549	-0.642043	-0.448654	0.309107	0.0356238	-0.454316	-0.0538196	1.13703	0.896494	0.527707
Traf1	0.0001946	-0.0895879	0.256996	-0.135838	-0.0665099	-0.0042235	-0.117427	-0.339537	0.156945	-0.131585	0.812479
Traf2	-0.0136143	-0.0755594	0.153639	-0.0485295	-0.0274911	0.10173	0.0458264	0.124533	0.0284409	-0.0309754	0.667255
Bcl2l1 (Bclxl)	0.0309815	-0.125071	-0.0199922	0.153224	-0.0543263	-0.131805	-0.0971286	-0.158872	-0.137992	-0.186123	0.136153
Raf1	-0.161326	0.138218	0.12197	-0.147673	0.0205218	-0.0812052	-0.0602315	0.0949236	0.0108054	0.112793	0.932619
Hras	0.0224512	0.0519193	0.0748784	-0.0045385	-0.155949	-0.0014437	-0.0203277	-0.0130027	-0.0758147	-0.146484	0.692447
Pidd1	0.15621	0.124864	0.0254477	-0.141958	-0.198997	0.353542	0.0923518	0.225128	-0.016971	0.0693299	0.413124
Septin4 (Arts)	-0.240384	-0.288316	-0.195019	0.227786	0.367399	-0.545861	-0.458294	-0.462255	-0.261732	-0.238749	0.0589048
Fasl	0.407369	-0.443072	-1.02123	0.387667	0.185481	0.869432	0.362895	0.500965	2.21096	1.96179	0.0302367
Fas	-0.0966602		-0.203329	0.220673	0.0440217	2.27794	1.70686	1.70743	2.4132	2.31574	n/a (missing values)
Tnf		0.610938		1.21928	0.194637	1.77905	2.12051	1.53612	4.13944	3.89378	0.00849961
Tnfsf10 (Trail)	-0.456193	1.08929	-1.89629	-0.20925	0.01403	-2.56702	-1.21491	-2.67003	0.810445	0.719	0.867315
Ripk1	0.273292	-0.187919	-0.112483	0.13266	-0.164466	0.276656	-0.0707645	0.546364	0.66962	0.714281	0.0446057
Ccl2	0.892982	0.80104	-0.561611	-0.467757		0.537043	2.64404	0.849074	4.07697	2.19079	0.0158852
Tlr2	0.197395	0.485725	0.134227	-0.575114	-0.547201	0.616092	0.497054	0.833398	1.92381	1.55003	0.00255774
Il17c	0.206984	0.0155063	-0.456078	-0.338179	0.394972	0.932082	0.425545	0.911538	2.418	1.27237	0.015048
Tnfrsf1a (Tnfr1)	0.173484	0.204276	-0.0698374	-0.158569	-0.198502	-0.0979645	0.283227	0.147361	0.328528	0.196371	0.381976
Cybb (Nox2)	0.0510496	1.39129	-0.721201	-1.78886	-1.1686	0.707832	-0.347061	0.832308	1.50312	2.49395	0.134028
Capn1	-0.047828	0.426171	-0.0456498	-0.217914	-0.217115	-0.214665	0.239149	0.0448993	0.192515	-0.107626	0.911191
Mlkl	0.142331	0.4396	-0.163648	0.0368487	-0.686291	-0.0278746	-2.42338	-0.270811	0.807197	0.649445	0.937133
Aifm1	-0.133388	-0.0343352	0.0394999	-0.0380855	0.150724	0.0548023	-0.105046	0.0388894	-0.0862279	-0.0451362	0.867072
Ripk3	0.367018	-0.20153	0.0759242	-0.571488	0.155398	0.00465264	0.0710058	0.218413	0.839163	1.13867	0.257893
Sqstm1 (p62)	-0.0525476	-0.044476	-0.0221272	0.043374	0.0715227	-0.0620535	-0.419512	-0.0725367	0.0464149	-0.0551994	0.531915
Usp21	0.339074	-0.0810786	-0.221054	0.147068	-0.278496	-0.144688	-0.269338	-0.0430535	-0.151457	-0.256354	0.442263
Spata2	0.061728	-0.11276	0.0965097	0.103806	-0.17189	0.0475859	0.296209	0.14171	0.161438	-0.0298339	0.413903
Tlr4	-0.524105	0.973215	-0.374935	-0.396344	-0.303156	0.0605303	-0.699208	0.817109	1.0883	1.60808	0.265739
Il-6		2.11494			-0.58147	0.0854075	0.437515	2.30433	2.09655	2.45285	0.424115
Gpx4	-0.214145	-0.158063	-0.0843281	0.136663	0.261991	-0.326424	-0.499631	-0.507592	-0.328954	-0.340525	0.00335907
Atf3	-0.555759	-0.433421	0.00549603	0.551489	0.150278	0.623304	0.140504	1.10181	1.64646	1.75654	0.00515842
Ncoa4	-0.302011	0.515484	-0.113409	-0.543473	0.200238	0.576343	-0.0652613	-0.582067	-0.604473	0.62976	0.888213
Gls2	-0.408635	0.286047	0.0752614	-0.0369058	-0.0013362	-0.246056	-0.156779	-0.172764	-0.0013877	-0.107458	0.609004
Slc7a11	0.85616		-0.408487	-0.460433	-0.494912	-0.393402	-0.402019	-0.369878	-0.400468	0.0583461	0.217076
Sat1	-0.483643	-0.411163	-0.401535	0.215914	0.690928	-0.294208	-0.670669	-0.251608	0.330191	0.316412	0.920205
Sod1	-0.0236686	0.101771	-0.051344	-0.0498133	0.0173288	0.14112	-0.0128241	-0.0100945	-0.0020226	0.0096421	0.830335
Nfe2l2 (Nrf2)	-0.0633965	-0.0613232	0.0658648	0.0839917	-0.0321704	0.131249	0.00686979	0.19456	0.232701	0.127294	0.150716
Mt-Co2 (CoxII)	0.127423	-0.0700164	0.00920676	0.0882388	-0.175341	0.0918705	0.202299	-0.108234	-0.11405	-0.0134394	0.939245
Ptgs2	-0.19827	0.409954	-0.129089	-0.822043	0.400224	-0.256629	0.2196	0.0253032	0.299478	-0.491846	0.987582
Acsl4	0.385542	0.330886	0.322062	-0.773726	-0.734939	0.284844	-0.642982	0.241362	-0.679558	0.32333	0.973864
Keap1	0.0131011	-0.0748063	-0.173705	0.212757	-0.0058623	-0.0496924	-0.0251109	-0.0721222	-0.12695	-0.126226	0.600654
Casp1	-0.138943	0.606385	0.579301	-1.38104	-0.532598	1.26119	-0.191684	0.973269	1.59805	2.50294	0.0301536
Nlrp3	0.224553	0.271862	0.174467	-0.650759	-0.219728	0.506044	0.291111	0.911829	0.981855	1.28994	0.0284023
Pycard	0.159222	0.113074	0.0794289	-0.023122	-0.393872	0.218047	-0.0071545	0.717438	0.907921	0.857299	0.029588
Irf2	0.142748	-0.0150095	0.0208348	0.134374	-0.33246	0.194184	0.38281	0.437995	0.299623	0.233109	0.0287593
Gsdmd	0.0473609	0.0633034	0.0436178	-0.310955	0.117653	0.352102	-0.264324	0.500953	0.71664	0.725164	0.095137
Il1b	0.187657	0.696619	-0.919013	-0.58812	0.0653043	0.407747	0.106657	-0.856251	0.31318	1.31193	0.676334
Nlrp1a	1.04701	0.0190276	-1.38159	-1.63566	0.280798	0.907034	0.709174	-0.470832	0.924603	1.08685	0.474767
Nlrp1b	-0.361558	0.340049	0.183849	0.31165	-0.788765	-0.103151	-1.21339	-0.797783	1.35254	-0.177087	0.931423
Il18	-0.204692	0.774501	-0.746671	-0.291256	0.0122258	-0.872652	-0.914145	-0.847045	-0.445932	0.374675	0.444818
Pcbp2	0.120624	-0.131105	0.0270817	0.18276	-0.241848	0.0425066	0.227872	0.185312	-0.0612709	-0.109069	0.78524
Casp4	1.06447	-0.214466	0.192271		-0.145341	0.258503		1.10303	2.37817	2.91945	0.333389
