# Supplementary material for: Nuclear NAD+-biosynthetic enzyme NMNAT1 facilitates development and early survival of retinal neurons
Source: eLife. 2021 Dec 8;10:e71185. doi: 10.7554/eLife.71185 (PMC8754432; doi:10.7554/eLife.71185)
Supplement: Figure 4—source data 1. — Numerical source data for expression (relative to WT) of cell death-related genes in P4 KO retinas. Numerical source data for relative abundance of cyclic ADP-ribose (cADPR) in P4 WT and KO retinas. [file elife-71185-fig4-data1.xlsx]

## Sheet: Sheet1
Figure 4E: quantification of Caspase-3-positive (AC3+) and Caspase-3-negative (AC3-) pyknotic cells in WT (+/+) and KO (-/-) retinal sections											Figure 4F-I: Relative expression of cell death-related genes in P4 KO (-/-) retinas								Figure 4J: Relative abundance of cyclic ADP-ribose (cADPR) in P4 WT (+/+) and KO (-/-) retinas
		AC3+ pyknotic nuclei			AC3- pyknotic nuclei							KO								WT					KO
		Replicate 1	Replicate 2	Replicate 3	Replicate 1	Replicate 2	Replicate 3					Replicate 1	Replicate 2	Replicate 3	Replicate 4	Replicate 5	adjusted p-value (KO vs WT, DESeq2)		Metabolite	Replicate 1	Replicate 2	Replicate 3	Replicate 4	Replicate 5	Replicate 1	Replicate 2	Replicate 3	Replicate 4	Replicate 5	Replicate 6	p-value (KO vs WT, unpaired t-test)
P0	+/+	1	1	1	1.5	4	0.5		p-value ( KO P0 AC3+ vs KO P4 AC3+, unpaired t-test)		Noxa	1.80443	1.3275	1.42035	1.35634	1.92075	0.0191792		cADPR	1.11901	0.866542	0.699082	1.26981	1.04556	0.910403	0.733084	1	0.964127	0.741245	0.67426	0.1697
	-/-	22.5	10	19.5	10.5	21	15		0.025353		Casp8	1.60447	1.20055	1.62481	1.31932	1.55725	0.0253042
											Trp53	1.11678	1.36487	1.26912	1.2246	1.11779	0.0389274
P4	+/+	5	2	2.5	4.5	5	5.5		p-value ( KO P0 AC3- vs KO P4 AC3-, unpaired t-test)		Bim	1.25732	1.32316	1.26513	1.13307	1.17407	0.000535438
	-/-	184.5	83.5	225	84	59	77.5		0.001997		Htra2	0.830377	0.807532	0.76722	0.840449	0.849739	0.000286022
											Bnip3	0.769955	0.605455	0.68578	0.58781	0.65068	9.57e-06
P10	+/+	2.5	1.5	4.5	13	2.5	5.5				Chop	0.809867	0.826391	0.813835	0.838332	0.783074	0.0176281
	-/-	0.5	1	0.5	1.5	1	2				Cflar	0.810093	0.825436	0.777776	0.842782	0.914346	0.00547741
											Fasl	1.82694	1.286	1.41516	4.62985	3.89545	0.0302367
											Fas	4.84985	3.2645	3.26578	5.32656	4.9786	n/a (missing values)
											Nlrp3	1.42015	1.22358	1.88143	1.975	2.44517	0.0284023
											Irf2	1.14408	1.30388	1.35472	1.23082	1.17537	0.0287593
											Ripk1	1.21138	0.952133	1.4604	1.59065	1.64067	0.0446057
											Pycard	1.16316	0.995053	1.64426	1.87634	1.81164	0.029588
											Casp1	2.39694	0.875583	1.96328	3.02735	5.66839	0.0301537
											Tlr2	1.53272	1.41133	1.78188	3.79423	2.92823	0.00255774
											Tnf	3.43201	4.34848	2.90013	17.6237	14.8643	0.00849962
											Ccl2	1.451	6.25079	1.80134	16.8767	4.56557	0.0158852
											Il17c	1.90803	1.34308	1.88105	5.34431	2.41557	0.015048
											Sarm1	1.09244	1.16888	1.06008	1.17427	1.00728	0.687776
