# Supplementary material for: Nuclear NAD+-biosynthetic enzyme NMNAT1 facilitates development and early survival of retinal neurons
Source: eLife. 2021 Dec 8;10:e71185. doi: 10.7554/eLife.71185 (PMC8754432; doi:10.7554/eLife.71185)
Supplement: Figure 5—figure supplement 1—source data 1. — Numerical source data for expression (relative to WT) of Aldh8a1 and Ogdhl in E18.5 KO retinas. [file elife-71185-fig5-figsupp1-data1.xlsx]

## Sheet: Sheet1
Figure 5 Supplement 1 Panel A: Relative abundance of acylcarnitine species in P4 KO (-/-) retinas										Figure 5 Supplement 1 Panel A: Relative expression of Aldh8a1 and Ogdhl in E18.5 KO (-/-) retinas
Metabolite	Replicate 1	Replicate 2	Replicate 3	Replicate 4	Replicate 5	Replicate 6	adjusted p-value (Metaboanalyst)			Gene	Replicate 1	Replicate 2	Replicate 3	adjusted p-value (KO vs WT, DESeq2)
carnitine	0.535045	0.70097	0.562923	0.705959	0.610301	0.735093	0.0093436			Aldh8a1	14.6005	6.88526	4.94871	0.00484433
butyryl carnitine	0.702819	0.748161	0.751331	0.624335	0.682715	0.619378	0.00013718			Ogdhl	0.697139	0.815882	0.786045	0.00116964
isobutyryl carnitine	0.705485	0.652858	0.743404	0.605214	0.65279	0.564282	0.0004325
2-MB carnitine	0.599799	0.612589	0.726734	0.621261	0.689624	0.567412	0.036499
