# Supplementary material for: Nuclear NAD+-biosynthetic enzyme NMNAT1 facilitates development and early survival of retinal neurons
Source: eLife. 2021 Dec 8;10:e71185. doi: 10.7554/eLife.71185 (PMC8754432; doi:10.7554/eLife.71185)
Supplement: Figure 5—figure supplement 1—source data 2. [file elife-71185-fig5-figsupp1-data2.xlsx]

## Sheet: Sheet1
Figure 5 Supplement 2 Panel A: Relative abundance of nucleotide metabolites in P4 KO (-/-) retinas
Metabolite	Replicate 1	Replicate 2	Replicate 3	Replicate 4	Replicate 5	Replicate 6	adjusted p-value (Metaboanalyst)
adenosine	0.439519	0.458843	0.379244	0.590031	0.611719	0.390386	0.0081678
AMP	0.856366	0.858681	0.706074	0.819473	0.710748	0.841988	0.12269
ADP	0.754922	0.931795	1.18844	0.894188	1.01767	1.1596	0.9634
IMP	1.05559	1.01409	0.912496	1.11746	0.978278	1.034	0.8925
GMP	1.54081	1.3485	1.55582	1.72013	1.6796	1.63951	0.00040379
GDP	0.834751	0.854916	1.43711	0.855811	1.05866	1.19699	0.86964
GTP	0.745405	0.724679	1.28822	0.572974	0.975646	0.916879	0.64844
uracil	0.973996	1.16411	0.890542	1.15192	1.16457	1.08	0.53195
UDP	0.839585	1.01526	1.08486	0.864078	0.99261	1.06528	0.86964
cytidine	1.01089	1.24851	1.13438	1.75513	1.41095	1.12725	0.26988
hypoxanthine	1.07469	1.04341	1.26108	1.82935	1.78569	1.35418	0.093266
xanthine	2.07618	1.41302	1.46108	4.22334	3.82284	2.18788	0.040424
guanine	1.90779	1.48077	1.96541	3.23181	3.51466	2.77311	0.0095397
cytosine	3.85181	3.0323	3.70026	6.17241	5.38341	5.03662	0.00046564
Figure 5 Supplement 2 Panel B: Relative abundance of amino acid metabolites in P4 KO (-/-) retinas
Metabolite	Replicate 1	Replicate 2	Replicate 3	Replicate 4	Replicate 5	Replicate 6	adjusted p-value (Metaboanalyst)
threonine	1.45141	1.09827	1.09616	1.33669	1.22546	1.1305	0.020375
valine	1.58659	1.38753	1.33828	1.33506	1.57898	1.61455	0.0012718
arginine	1.76294	1.69594	1.14841	1.96286	2.16465	1.63519	0.0081678
lysine	1.74556	1.53774	1.09085	2.37808	1.16179	1.81918	0.036272
acetyl-lysine	1.60164	1.43654	1.26315	1.9239	1.82406	1.66618	0.0065109
arginosuccinate	1.76657	1.49056	1.33413	1.80661	2.06145	1.3233	0.0065109
acetyl-asparagene	1.71499	1.61073	1.31882	2.21191	2.3753	1.76532	0.0065109
aspartic acid	1.62269	1.50648	1.3795	1.69489	1.57343	1.56484	0.00028242
glutamic acid	0.855354	0.75344	0.873343	0.88776	0.832542	0.738436	0.040424
aminobutyric acid	0.758992	0.703212	0.857088	0.994548	0.884382	0.809335	0.036499
proline	1.04626	0.826196	0.891027	0.8163	0.97734	0.845082	0.17121
glutamine	0.998232	0.716674	0.750654	0.875022	0.927759	0.643646	0.14899
tryptophan	0.832517	1.3367	0.821962	1.19578	0.736056	1.0755	0.99867
alanine	0.948376	0.980673	0.998819	1.03426	0.930721	1.00154	0.66856
glycine	0.806542	0.624363	1.04598	1.20834	0.819563	0.87812	0.44983
serine	0.998162	0.747747	1.07054	1.00221	0.927325	0.976604	0.66856
leucine	1.23014	1.02879	1.02736	1.04676	1.36469	1.06746	0.25437
methionine	0.949732	0.76908	0.997998	1.0137	0.868837	1.06218	0.45548
histidine	1.28206	0.869325	1.09278	1.37127	1.54203	1.62335	0.17121
phenylalanine	1.06824	0.953911	1.0919	1.07866	1.04908	1.01314	0.48233
tyrosine	1.39158	1.17917	1.3618	1.10175	1.04003	1.30372	0.054745
acetyl-tryptophan	1.06246	1.48702	1.53972	1.62547	0.479697	1.35797	0.50014
acetyl aspartic acid	1.20115	1.23861	1.65049	1.24551	1.23751	0.83704	0.27712
