# Supplementary material for: Nuclear NAD+-biosynthetic enzyme NMNAT1 facilitates development and early survival of retinal neurons
Source: eLife. 2021 Dec 8;10:e71185. doi: 10.7554/eLife.71185 (PMC8754432; doi:10.7554/eLife.71185)
Supplement: Figure 5—source data 1. — Numerical source data for abundance (relative to WT) of various metabolites in P4 KO retinas. Numerical source data for expression of glycolysis/TCA pathway enzymes in P4 WT and KO retinas. [file elife-71185-fig5-data1.xlsx]

## Sheet: Sheet1
Figure 5B: metabolic pathway overrepresentation analysis on significantly changed metabolites in P4 KO (-/-) retinas							Figure 5C: Relative abundance of NAD-pathway metabolites in P4 KO (-/-) retinas									Figure 5G: Relative expression of glycolysis/TCA pathway enzymes in P4 WT (+/+) and KO (-/-) retinas
Pathway	total	expected	hits	FDR	enrichment ratio			KO									WT					KO
Arginine and Proline Metabolism	53	2.02	10	0.000673	4.9505		Metabolite	Replicate 1	Replicate 2	Replicate 3	Replicate 4	Replicate 5	Replicate 6	adjusted p-value (Metaboanalyst)		Gene	Replicate 1	Replicate 2	Replicate 3	Replicate 4	Replicate 5	Replicate 1	Replicate 2	Replicate 3	Replicate 4	Replicate 5	adjusted p-value (KO vs WT, DESeq2)
Glycolysis	25	0.952	7	0.000673	7.35294		NAD	0.692575	0.454513	0.857793	0.534471	0.654463	0.633771	0.034549		Hk3	0.188506	0.637947	-0.230951	-0.500288	-0.424173	1.1673	-0.20879	1.77765	2.3024	2.76717	0.00064315
Gluconeogenesis	35	1.33	8	0.000673	6.01504		NADH	0.822276	0.442808	1.08367	0.566929	0.97879	1.02157	0.41542		Pck1	0.982137				1.59675	2.41563		2.16062	5.13275	4.85849	0.042765
Warburg Effect	58	2.21	10	0.000673	4.52489		NADP	0.745955	0.692585	1.0473	0.492204	0.75647	0.775563	0.043057		Pklr				2.32193		5.24427	3.09387	3.53184	5.03831	5.30625	0.000518602
Glucose-Alanine Cycle	13	0.495	5	0.00125	10.101		NAM	0.378884	0.534438	0.388098	0.601617	0.329641	0.424059	0.011967		Aldh8a1	-0.525562	0.621762	-0.549769	-0.450201	0.434548	2.48438	2.89094	2.85086	4.03606	3.90357	5.8e-16
Nicotinate and Nicotinamide Metabolism	37	1.41	7	0.00393	4.96454		NaAD	0.64817	0.449446	0.815369	0.582785	0.628227	0.637311	0.0087831		Pgm1	-0.100818	-0.143601	-0.0865872	0.114796	0.186081	-0.472015	-0.632004	-0.543113	-0.483232	-0.434999	1.75e-07
Glutamate Metabolism	49	1.87	8	0.00393	4.27807		NR	1.42254	1.77337	2.35958	1.61207	1.49475	2.67471	0.017152		Hk1	0.00973942	-0.173826	-0.0328996	0.179906	-0.0050967	-0.293369	-0.102665	-0.23985	-0.422005	-0.323161	0.0203196
Malate-Aspartate Shuttle	10	0.381	4	0.00393	10.4987		Tryp	0.835517	1.33683	0.820308	1.19222	0.728294	1.06815	0.99867		Hk2	-0.0121724	0.506243	-0.0967204	-0.112608	-0.458021	-0.359135	-0.237971	-0.324418	-0.881562	-0.787254	0.0656298
Urea Cycle	29	1.1	6	0.00558	5.45455											Gpi1	-0.0451924	-0.0367604	0.112001	0.13143	-0.1846	-0.163688	-0.319728	-0.139453	-0.135915	-0.268143	0.0753094
Carnitine Synthesis	22	0.838	5	0.0099	5.96659		NMN	8.56709	6.12825	10.8182	6.24933	7.15167	8.35322	0.00013718		Aldoa	0.0390593	-0.214449	-0.0309809	0.141538	0.0410271	-0.257433	-0.325599	-0.30211	-0.332292	-0.416611	0.000501578
Lysine Degradation	30	1.14	5	0.0389	4.38596											Tpi1	-0.0901702	-0.0037008	0.0846212	-0.072327	0.0726382	-0.124763	-0.432466	-0.245879	-0.43487	-0.423506	0.00187163
Purine Metabolism	74	2.82	8	0.0398	2.83688											Bpgm	-0.0509649	0.0319296	-0.0691316	0.0237045	0.0601204	-0.131575	-0.0949514	-0.153104	-0.166081	-0.213139	0.016995
Glycine and Serine Metabolism	59	2.25	7	0.0398	3.11111											Pgk1	-0.0412807	0.136945	0.0134587	-0.133548	0.0110297	-0.0476388	-0.486389	-0.176177	-0.492137	-0.452722	0.030886
Beta-Alanine Metabolism	34	1.29	5	0.0533	3.87597											Eno2	0.0736121	-0.448115	-0.0286986	0.0123346	0.293678	-0.520169	-0.48349	-0.489208	-0.277835	-0.268361	0.0223098
Aspartate Metabolism	35	1.33	5	0.0564	3.7594		Figure 5E: Relative abundance of glycolysis/TCA/creatine metabolites in P4 KO (-/-) retinas									Eno3	-0.313174	0.631753	-0.464712	-0.085733	-0.0309677	-0.552516	-0.574597	-0.575396	-0.604554	-0.624942	0.0155087
Galactose Metabolism	38	1.45	5	0.0736	3.44828											Pkm	-0.0342836	-0.0207729	0.0325883	0.00334328	0.0180834	-0.029713	-0.262037	-0.132338	-0.20361	-0.342232	0.0439019
Glycerolipid Metabolism	25	0.952	4	0.0736	4.20168			KO								Ldha	-0.225556	-0.191822	-0.0833392	0.166749	0.266444	-0.47179	-0.792608	-0.579047	-0.646357	-0.617084	5.04e-06
Phytanic Acid Peroxisomal Oxidation	26	0.99	4	0.0799	4.0404		Metabolite	Replicate 1	Replicate 2	Replicate 3	Replicate 4	Replicate 5	Replicate 6	adjusted p-value (Metaboanalyst)		Mdh1	-0.0261984	-0.0732539	-0.0622727	0.0150676	0.13652	-0.148055	-0.250373	-0.217909	-0.33672	-0.176124	0.00659686
Pentose Phosphate Pathway	29	1.1	4	0.111	3.63636		G6P	2.27936	2.13961	2.26167	3.27414	3.06703	3.13835	0.0004325		Suclg1	-0.0922935	-0.0953317	-0.163171	0.0371228	0.271171	-0.236954	-0.293893	-0.279978	-0.267224	-0.18757	0.0439218
Starch and Sucrose Metabolism	31	1.18	4	0.132	3.38983		F16BP	2.8927	2.11405	2.56447	2.73889	4.01458	3.62439	0.0012718		Ogdhl	-0.162742	-0.30702	-0.13303	0.312255	0.195101	-0.67582	-0.633546	-0.561224	-0.458314	-0.496261	0.00026506
Ammonia Recycling	32	1.22	4	0.133	3.27869		glucose	1.14118	1.1	1.45542	1.93358	1.96876	1.78466	0.030714		Aco1	0.0112383	-0.0191366	-0.0011279	0.0425326	-0.0347248	0.131949	0.143461	0.138884	0.0635252	0.0799032	0.03057
Fructose and Mannose Degradation	32	1.22	4	0.133	3.27869		G3P	0.817369	0.868901	0.782386	0.806237	0.671951	0.884608	0.017053
Mitochondrial Electron Transport Chain	19	0.724	3	0.138	4.14365		DHAP	0.63643	0.800194	0.473964	0.693457	0.679648	0.693251	0.030453
Nucleotide Sugars Metabolism	20	0.762	3	0.152	3.93701		succinate	0.740021	0.663821	0.656152	0.780978	0.665631	0.67481	0.023088
De Novo Triacylglycerol Biosynthesis	9	0.343	2	0.168	5.8309		a-ketoglutarate	0.758815	0.694128	0.681307	0.799113	0.681673	0.700573	0.023886
Transfer of Acetyl Groups into Mitochondria	22	0.838	3	0.18	3.57995		phosphocreatine	0.527142	0.684421	0.671029	0.672337	0.535455	0.596538	0.014718
Glycerol Phosphate Shuttle	11	0.419	2	0.209	4.77327		creatine	0.722776	0.638532	0.697755	0.827341	0.720683	0.840776	0.023088
Cardiolipin Biosynthesis	11	0.419	2	0.209	4.77327		ATP	0.773414	0.693324	1.31044	0.542417	0.92332	0.804044	0.50014
Propanoate Metabolism	42	1.6	4	0.209	2.5
Valine, Leucine and Isoleucine Degradation	60	2.29	5	0.209	2.18341
Cysteine Metabolism	26	0.99	3	0.209	3.0303
Oxidation of Branched Chain Fatty Acids	26	0.99	3	0.209	3.0303		Figure 5H: Relative abundance of pentose phosphate pathway metabolites in P4 KO (-/-) retinas
Inositol Phosphate Metabolism	26	0.99	3	0.209	3.0303
Plasmalogen Synthesis	26	0.99	3	0.209	3.0303			KO
Ketone Body Metabolism	13	0.495	2	0.237	4.0404		Metabolite	Replicate 1	Replicate 2	Replicate 3	Replicate 4	Replicate 5	Replicate 6	adjusted p-value (Metaboanalyst)
Folate Metabolism	29	1.1	3	0.256	2.72727		Erythritol	0.400453	0.505846	0.356026	0.613667	0.402981	0.33747	0.00040379
Citric Acid Cycle	32	1.22	3	0.313	2.45902		Ribulose 5-P	0.756891	1.4397	0.904873	1.38897	1.0681	1.03768	0.70596
Inositol Metabolism	33	1.26	3	0.327	2.38095		Erythrose 4-P	0.73227	0.789242	0.738644	1.02404	0.798839	0.867629	0.25437
Tyrosine Metabolism	72	2.74	5	0.329	1.82482
Alanine Metabolism	17	0.647	2	0.329	3.09119
Butyrate Metabolism	19	0.724	2	0.376	2.76243
Ethanol Degradation	19	0.724	2	0.376	2.76243
Lactose Synthesis	20	0.762	2	0.389	2.62467
Threonine and 2-Oxobutanoate Degradation	20	0.762	2	0.389	2.62467
Glutathione Metabolism	21	0.8	2	0.396	2.5
Betaine Metabolism	21	0.8	2	0.396	2.5
Tryptophan Metabolism	60	2.29	4	0.396	1.74672
Histidine Metabolism	43	1.64	3	0.454	1.82927
Androstenedione Metabolism	24	0.914	2	0.454	2.18818
Estrone Metabolism	24	0.914	2	0.454	2.18818
Biotin Metabolism	8	0.305	1	0.504	3.27869
Mitochondrial Beta-Oxidation of Short Chain Saturated Fatty Acids	27	1.03	2	0.504	1.94175
Phenylalanine and Tyrosine Metabolism	28	1.07	2	0.504	1.86916
Selenoamino Acid Metabolism	28	1.07	2	0.504	1.86916
Mitochondrial Beta-Oxidation of Long Chain Saturated Fatty Acids	28	1.07	2	0.504	1.86916
Thiamine Metabolism	9	0.343	1	0.504	2.91545
Lactose Degradation	9	0.343	1	0.504	2.91545
Pterine Biosynthesis	29	1.1	2	0.504	1.81818
Phospholipid Biosynthesis	29	1.1	2	0.504	1.81818
Degradation of Superoxides	11	0.419	1	0.57	2.38663
Androgen and Estrogen Metabolism	33	1.26	2	0.58	1.5873
Fatty Acid Elongation In Mitochondria	35	1.33	2	0.615	1.50376
Retinol Metabolism	37	1.41	2	0.645	1.41844
Vitamin K Metabolism	14	0.533	1	0.645	1.87617
Sphingolipid Metabolism	40	1.52	2	0.688	1.31579
Beta Oxidation of Very Long Chain Fatty Acids	17	0.647	1	0.693	1.5456
Phosphatidylinositol Phosphate Metabolism	17	0.647	1	0.693	1.5456
Methionine Metabolism	43	1.64	2	0.693	1.21951
Fatty acid Metabolism	43	1.64	2	0.693	1.21951
Steroidogenesis	43	1.64	2	0.693	1.21951
Ubiquinone Biosynthesis	20	0.762	1	0.75	1.31234
Pyruvate Metabolism	48	1.83	2	0.757	1.0929
Caffeine Metabolism	24	0.914	1	0.82	1.09409
Mitochondrial Beta-Oxidation of Medium Chain Saturated Fatty Acids	27	1.03	1	0.867	0.970874
Bile Acid Biosynthesis	65	2.48	2	0.939	0.806452
Amino Sugar Metabolism	33	1.26	1	0.939	0.793651
Arachidonic Acid Metabolism	69	2.63	2	0.96	0.760456
Porphyrin Metabolism	40	1.52	1	0.999	0.657895
Steroid Biosynthesis	48	1.83	1	1	0.546448
Pyrimidine Metabolism	59	2.25	1	1	0.444444
