# Supplementary material for: Nuclear NAD+-biosynthetic enzyme NMNAT1 facilitates development and early survival of retinal neurons
Source: eLife. 2021 Dec 8;10:e71185. doi: 10.7554/eLife.71185 (PMC8754432; doi:10.7554/eLife.71185)
Supplement: Figure 5—source data 2. [file elife-71185-fig5-data2.xlsx]

## Sheet: Sheet1
Peak Intensity Tables for E18.5 and P4 LC-MS/MS experiments
note: N/A indicate abundance values below the detection threshold of the instrument
E18.5 Dataset										P4 Dataset
Sample Name	F25	F26	F29	F51	F30	F31	F60			Sample Name	R31	R36	R40	R42	R43	R46	R32	R37	R41	R44	R45	R47
Sample Genotype	KO	KO	KO	KO	WT	WT	WT			Genotype	WT	WT	WT	WT	WT	WT	KO	KO	KO	KO	KO	KO
NAD	4.5141e+06	3.45139e+06	2.65075e+06	4.40121e+06	4.00306e+06	5.38689e+06	6.08878e+06			NAD	2.73471e+06	2.91003e+06	2.88245e+06	5.31098e+06	2.8133e+06	4.05694e+06	2.21174e+06	1.38661e+06	2.53819e+06	1.44409e+06	1.98212e+06	1.72324e+06
GSSH	6.29736e+06	4.31996e+06	4.36505e+06	6.00029e+06	4.39325e+06	4.18346e+06	2.68234e+06			GSSH	6.00277e+06	1.41499e+07	1.38596e+07	1.03483e+07	9.47642e+06	1.27997e+07	7.2634e+06	8.02595e+06	7.52195e+06	7.88788e+06	7.57501e+06	5.94274e+06
4Hydroxyproline	1.82852e+06	641198	959121	880674	735868	753328	921777			4Hydroxyproline	3.3597e+06	3.69436e+06	4.05154e+06	3.00837e+06	2.29738e+06	2.04942e+06	2.14869e+06	2.32093e+06	2.38541e+06	2.11603e+06	1.55011e+06	1.81324e+06
Proline	3.11347e+06	2.21675e+06	2.60235e+06	2.15206e+06	2.19239e+06	2.3941e+06	2.08863e+06			Proline	4.43606e+06	6.09039e+06	5.81749e+06	7.16568e+06	4.40019e+06	6.74315e+06	5.59848e+06	4.20856e+06	4.393e+06	3.67137e+06	4.88979e+06	3.8101e+06
NADH	285889	187828	194637	259663	244012	307345	343212			NADP	121544	199127	203634	219596	130665	197270	121968	108181	158665	68090.1	117302	107969
NADP	164189	107386	99611.8	133922	111947	169579	164054			Arginine	1058051	2.20236e+06	1.71591e+06	1.90122e+06	1.74192e+06	2.1441e+06	2.92639e+06	2.68934e+06	1.76631e+06	2.75669e+06	3.4077e+06	2.31104e+06
Arginine	889478	433495	486047	375875	387979	311903	452778			NMN	N/A	N/A	N/A	N/A	N/A	N/A	69125.8	47237.3	80879.5	42662.4	54725.9	57386.2
NMN	485740	339478	281534	485222	N/A	N/A	N/A			NR	42423.1	63210.3	69922.4	111149	70846.6	89970.6	97784.9	116452	150285	93755.2	97443.8	156541
NR	67378.7	63439.3	43537.2	68829.7	38250.3	41256.5	40634.7			Glutamine	1.97122e+07	2.83712e+07	2.35697e+07	1.97259e+07	1.28801e+07	2.38348e+07	1.97161e+07	1.34751e+07	1.36605e+07	1.45263e+07	1.71332e+07	1.07113e+07
Glutamine	5.84258e+06	2.46545e+06	2.22226e+06	2.96923e+06	2.45156e+06	2.49758e+06	3.09373e+06			ATP	3.64335e+06	6.63529e+06	6405034	1.19365e+07	5.26564e+06	8.61415e+06	5.00792e+06	4.27366e+06	7.81806e+06	2.95206e+06	5.58997e+06	4.38662e+06
ATP	2.16216e+07	9.09917e+06	6.56912e+06	1.73103e+07	5.04973e+06	3.57076e+06	3.7362e+06			Nicotinamide	708693	1.38048e+06	1.69738e+06	1.03822e+06	1.61487e+06	1.50435e+06	468785	631693	444922	629784	386801	446725
Nicotinamide	114537	40424.7	59704.1	77118	66690.1	97642.5	81680			N1-Methylnicotinamide	71696.6	82196.5	21954.4	18560.5	27999.8	42636.1	19939.3	31817.9	41893.7	23121.1	30439.2	30757.4
N1-Methylnicotinamide	113920	66963	83548.8	49029.8	65926.7	63335	46230.9			Udp Glucose	58329.2	49844.3	50904.9	212953	62570.7	111779	159290	92689.6	200651	100114	180290	179017
Udp Glucose	526148	428091	433068	594768	403630	488418	485308			Choline	2.28292e+07	2.16434e+07	1.90201e+07	1.90638e+07	1.5991e+07	1.86558e+07	1.4719e+07	1.35585e+07	1.38777e+07	1.39488e+07	1.48033e+07	1.23278e+07
Choline	2.62446e+06	2.181e+06	3.66904e+06	1890334	3.31856e+06	2.80949e+06	3.08201e+06			O Acetyl L Carnitine	5721937	5.46467e+06	8.5956e+06	1.27032e+07	7.22881e+06	8.64697e+06	7.07759e+06	6.30949e+06	1.10931e+07	6.55993e+06	8.07981e+06	8.84186e+06
O Acetyl L Carnitine	3.72732e+06	1.80773e+06	2.0761e+06	1.76025e+06	1.66925e+06	1.78348e+06	1.89377e+06			FAD	18242.3	20575.6	13787.8	41575.5	11454.5	33313.7	23121.1	17393.8	48151.2	11242.3	25454.4	25454.4
FAD	51415.3	27573.4	24256.4	36591.9	24049.1	28610.1	30475.9			Palmitoyl Coenzyme A	112424	171817	154847	301740	60666.3	141590	194302	142544	283604	104999	111893	116242
coA	N/A	N/A	N/A	12646.1	N/A	40218.8	82096			Carnitine	70846	63846	71694.5	57270.5	53876.6	86330.7	33726.3	42210.4	32877.8	37649.8	36483.9	39451.8
Malonyl CoA	621.92	1243.82	N/A	2073.1	621.94	1865.88	1036.52			Ornithine	142225	247967	241816	208936	202361	200453	259210	206710	148907	226756	262391	166725
Acetyl coa	8707.42	13682.9	14408.5	132890	8499.96	50792.3	80853.5			Adenosine	1.87252e+06	1.50175e+06	2.38966e+06	1.51384e+06	1.07308e+06	1.41913e+06	666984	665185	533250	757560	880375	504403
Palmitoyl Coenzyme A	44780.9	29232	48098	39597.7	25292.8	21975.9	31926.9			1Methyladenosine	186029	243302	252741	197696	179666	251362	239271	182529	221029	262286	234499	200559
Ornithine	169998	138174	122316	140248	109877	146401	83677.4			Creatine	1.45099e+07	1.69882e+07	1.49333e+07	1.4929e+07	1.18966e+07	1.19172e+07	9.66958e+06	8.13215e+06	8.60092e+06	9.30325e+06	9.0149e+06	9.4774e+06
Spermine	717726	494653	428001	530743	496830	470396	539224			Cytidine	363149	294423	302907	212332	162696	204166	246087	289331	254438	359119	321150	231211
Adenosine	97025.1	171431	329401	97854.1	319482	275656	319541			GDP	765958	1.8012e+06	1.726e+06	2.48571e+06	1.42628e+06	1.85391e+06	1.28321e+06	1.25107e+06	2.03549e+06	1.10577e+06	1.52163e+06	1.55037e+06
1Methyladenosine	109538	111537	72042.3	180574	108634	126982	141494			Betaine	5.32862e+07	5.31874e+07	5.67319e+07	5.48589e+07	5.09394e+07	5.27844e+07	4.41514e+07	5.94055e+07	3.89552e+07	3.8871e+07	4.17792e+07	3.93513e+07
Creatine	4.16904e+06	1.89203e+06	2.89009e+06	2.11706e+06	1.75344e+06	2.0814e+06	2.37847e+06			Homoserine	4.05372e+06	6.61096e+06	6416791	5.94993e+06	4.47088e+06	5.82077e+06	5.87868e+06	4.88377e+06	4.83487e+06	5.15865e+06	5.6322e+06	4.80464e+06
Uridine	26640	38146.1	26536.2	23219.3	20317.1	22390	21042.6			Tryptophan	532421	538997	533694	354453	337059	371634	349998	534967	318392	422543	289332	380968
Cytidine	725294	597310	637801	528347	611382	637207	1.12517e+06			Aspartic Acid	3.85442e+06	4.77672e+06	5.47692e+06	4.07227e+06	3.03575e+06	3.99527e+06	6.31215e+06	5.59815e+06	4.97208e+06	5.57811e+06	5.80455e+06	5.18272e+06
Histamine	143257	176842	223490	202783	197679	198299	206221			Cytosine	671562	662859	543229	415642	335144	550861	1.91666e+06	1.44143e+06	1.70604e+06	2.5986e+06	2.54049e+06	2.13386e+06
GDP	897874	724044	1.14655e+06	574468	800880	928144	1.0232e+06			3 Aminoisobutyrate	4.24913e+07	6.08375e+07	5.87277e+07	5.60562e+07	4.90495e+07	5.18962e+07	4.79726e+07	4.54664e+07	4.45631e+07	4.67772e+07	4.6106e+07	4.13242e+07
Betaine	7.65735e+06	5.20869e+06	7.6899e+06	7.27589e+06	4.49696e+06	5.01911e+06	6.05187e+06			Thiamine	636.36	4242.4	1909.08	6363.6	2969.68	1272.66	9333.28	3818.16	28105.9	11136.3	14424.2	20045.3
Homoserine	7.93087e+06	4.36399e+06	4.60727e+06	4.98007e+06	4.62398e+06	4.26571e+06	3.84458e+06			Alanine	9.62435e+06	1.35159e+07	1.33609e+07	1.36373e+07	1.01412e+07	1.18819e+07	10630243	1.04642e+07	1.03154e+07	9.74399e+06	9.75426e+06	9.45878e+06
Tryptophan	806889	268272	374627	346121	275943	482641	442006			Glycine	2.25579e+06	4.02662e+06	3.96025e+06	3.32813e+06	2.34305e+06	3.36652e+06	2.38676e+06	1.75888e+06	2.85197e+06	3.0055e+06	2.26765e+06	2.18948e+06
Aspartic Acid	1.94929e+06	879755	1.01814e+06	1.13855e+06	626928	685806	495489			Serine	1.45798e+07	2.46175e+07	1.98459e+07	1.8517e+07	1.30314e+07	1.64303e+07	1.65092e+07	1.17733e+07	1.63143e+07	1.39326e+07	1.43407e+07	1.36097e+07
Cytosine	197983	128637	156314	160254	131850	138277	290549			Valine	1.99149e+06	3643161	2.82904e+06	3.50974e+06	2.22896e+06	3.38204e+06	4.2687e+06	3.56627e+06	3.33621e+06	3.03904e+06	4.0289e+06	3.69852e+06
3 Aminoisobutyrate	1.74544e+07	1.47175e+07	2.74889e+07	8.76371e+06	2.09954e+07	1.87121e+07	2.06353e+07			Threonine	2.36865e+06	3.47723e+06	3.53589e+06	3.64595e+06	2.47925e+06	3.37214e+06	4.2104e+06	3.04357e+06	2.94632e+06	3.28072e+06	3.3714e+06	2.79221e+06
Thiamine	7048.44	14304.5	8396.12	21249.1	7670.58	30682.1	29023.5			Pyroglutamic Acid	647602	708269	480664	668920	520224	585875	998343	604436	426998	423922	420422	384149
Alanine	6.29489e+06	3.72755e+06	4.28959e+06	4.02897e+06	4.03704e+06	3.6867e+06	3.9952e+06			Leucine	1.07417e+07	1.82783e+07	1.72651e+07	1.5232e+07	9.10875e+06	1.77633e+07	1.66077e+07	1.32221e+07	1.27796e+07	1.18781e+07	1.72267e+07	1.21426e+07
Glycine	372225	248565	261419	275515	238614	245159	242761			Glutamic Acid	4.64234e+07	5.7539e+07	5.4945e+07	4.5496e+07	3.69018e+07	4.47601e+07	3.8016e+07	3.19897e+07	3.5965e+07	3.33827e+07	3.50918e+07	2.79434e+07
Serine	4.28405e+06	2.83094e+06	2.73081e+06	3.53064e+06	2.96021e+06	2.89604e+06	3.17427e+06			2-Hydroxyglutaric Acid	206075	338543	293786	236725	232058	285089	295164	225907	204377	193665	238211	192287
Valine	8.2398e+06	6.0691e+06	6.36265e+06	6.17164e+06	6.77407e+06	6.68016e+06	5.97456e+06			Taurine	8.40388e+06	7.19523e+06	7.60726e+06	7.12361e+06	6.89284e+06	6.10959e+06	5.57303e+06	6.25828e+06	5.85338e+06	5.408e+06	4.67937e+06	5.05397e+06
Threonine	7.84878e+06	5.12242e+06	6.23587e+06	5.37762e+06	5.52442e+06	5.51082e+06	5.1465e+06			Methionine	318604	439937	453937	446513	293362	363043	340240	262286	329422	305241	291029	320619
Pyroglutamic Acid	2.35503e+06	1.45096e+06	1.59524e+06	1.56447e+06	1.56498e+06	1.60469e+06	1.71477e+06			Histidine	1.91065e+06	4.64041e+06	4.50519e+06	5.25121e+06	2.6255e+06	5.89457e+06	4.80204e+06	3.09968e+06	3.77125e+06	4.31704e+06	5.40034e+06	5.12309e+06
Leucine	2.11073e+07	1.22304e+07	1.29332e+07	1.43899e+07	1.36194e+07	1.30677e+07	1.40192e+07			Phenylalanine	4.41941e+06	6.41461e+06	7.33978e+06	6.1588e+06	3.93695e+06	5.95039e+06	5.61471e+06	4.77291e+06	5.28783e+06	4.76528e+06	5.15558e+06	4.48676e+06
Asparagene	147093	96921.4	102415	142221	88836.1	86140.8	125302			Tyrosine	951781	1.4125e+06	1.13357e+06	1.41611e+06	859615	992508	1.46023e+06	1.1779e+06	1.31663e+06	971721	1.0204e+06	1.15266e+06
Glutamic Acid	4.80379e+07	2.44265e+07	2.57743e+07	2.71682e+07	2.42793e+07	2.57693e+07	2.31522e+07			Lysine	1.06802e+06	1.11013e+06	1.26625e+06	1.06262e+06	809874	1.02889e+06	1.72177e+06	1.44899e+06	996964	1.98459e+06	1.0868e+06	1.52778e+06
Taurine	7.94556e+06	5.78664e+06	5.92865e+06	7.88428e+06	5.28101e+06	6.06678e+06	6.88354e+06			Aminobutyric Acid	6.13748e+06	8.61856e+06	9.26168e+06	7.50035e+06	5.69701e+06	7.43523e+06	5.21879e+06	4.61912e+06	5.4605e+06	5.78578e+06	5.76701e+06	4.73812e+06
Methionine	732044	431224	410491	315954	412980	380638	282576			Erythritol	2.43365e+06	3.71655e+06	4.09413e+06	2.51097e+06	2523803	3.44769e+06	1.15489e+06	1.39363e+06	951358	1.49735e+06	1.10218e+06	828647
Histidine	1.83194e+06	834023	921102	1.10582e+06	816611	941628	651178			Stearoyl Carnitine	48893.3	51332.9	60454.1	49211.4	37757	51757.3	49635.8	34999.8	36272.5	54514.6	64908.4	22484.7
Phenylalanine	8.50559e+06	3.95919e+06	5.06586e+06	4.87223e+06	4.07757e+06	4819254	4.679e+06			Myristoyl Carnitine	824718	1.03726e+06	1.08339e+06	788656	422645	991441	690976	550446	434631	650355	691931	369510
Tyrosine	990106	480127	451519	422911	472455	453178	376265			Decanoyl Carnitine	320719	369503	403757	437379	170752	477893	272354	250083	188924	204902	300142	181144
Lysine	4.95905e+06	3.67103e+06	3.53656e+06	4.06315e+06	3.21731e+06	3.00803e+06	3.43189e+06			Octanoyl Carnitine	504782	626470	699954	750345	318293	983138	587285	478773	379042	377716	674195	414466
Aminobutyric Acid	722586	636865	598922	710129	503559	550311	648576			Hexanoyl Carnitine	3.42928e+06	3.27483e+06	4.34621e+06	4.45633e+06	2.32818e+06	4.65144e+06	2.97161e+06	2.90981e+06	2.18447e+06	2.23527e+06	3.24853e+06	2.39584e+06
Hypotaurine	333991	252515	145953	260185	141599	168965	167929			2 Methylbutyryl Carnitine	1.69271e+07	1.08284e+07	1.49691e+07	1.53158e+07	8.48574e+06	1.31055e+07	7.46428e+06	7.28271e+06	8.37978e+06	6.54125e+06	8.13904e+06	6.01211e+06
Erythritol	718715	476689	561060	615270	636933	538361	786604			Isobutyryl Carnitine	9.50192e+06	9.26914e+06	1.08312e+07	1.07021e+07	7.40762e+06	1.03684e+07	6.35851e+06	5621180	6.20822e+06	4.61509e+06	5.57982e+06	4.33022e+06
Stearoyl Carnitine	247311	129149	115882	130393	130704	118474	172889			Butyryl Carnitine	9.66864e+06	1.07925e+07	1.21454e+07	1.24978e+07	8.7194e+06	1.20359e+07	7159050	7.28028e+06	7.09117e+06	5.38064e+06	6.59524e+06	5.37173e+06
Myristoyl Carnitine	849115	590399	456069	503231	343502	376258	531215			Propionyl Carnitine	1.68073e+06	1.49891e+06	1.99647e+06	2.38359e+06	961540	1.69102e+06	1.67596e+06	1.40614e+06	1.27675e+06	908404	1.59875e+06	987525
Decanoyl Carnitine	131051	117128	84373.3	92044.3	113604	93703.1	107386			Trigonelline	116030	173726	97363.1	86120.7	103515	131090	44757.3	57272.4	82938.9	75939	79757.1	97363.1
Hexanoyl Carnitine	640196	445730	486468	406754	352439	434120	447391			3Hydroxybutyrate	1.11575e+06	796829	846041	734147	668602	740935	559360	714632	509936	581103	610269	486391
2 Methylbutyryl Carnitine	3.83688e+06	2.40509e+06	2.91135e+06	1.20903e+06	1.64034e+06	2.3314e+06	912991			Palmitoyl Carnitine	509404	1.50011e+06	1.89656e+06	1.60256e+06	1.29711e+06	1.66705e+06	1.33063e+06	1.16379e+06	1.3949e+06	1.75126e+06	1.25384e+06	1.37995e+06
Isobutyryl Carnitine	1.396e+07	6.454e+06	6.8543e+06	5.40955e+06	4.87715e+06	5.36997e+06	5.26307e+06			Acetyl Lysine	1.61137e+06	2.88694e+06	2.84038e+06	1.68996e+06	2.18229e+06	2.3435e+06	3.36549e+06	2.88365e+06	2.4593e+06	3.42034e+06	3.63498e+06	2.98092e+06
Butyryl Carnitine	1.18706e+07	6.6639e+06	7.05861e+06	5.74945e+06	5.17101e+06	5.74395e+06	5.1283e+06			Acetyl Tryptophan	86544.1	85907.9	89302.1	124938	46984.6	N/A	73074.8	97362.3	97574.6	93968.3	30848.6	78695.9
Propionyl Carnitine	534678	229918	307870	205454	249924	277187	320620			Acetyl Aspartic Acid	21424.1	20787.8	29484.7	15060.5	10818.1	27575.6	23121.1	22696.8	29272.6	20151.4	22272.6	13575.7
Trigonelline	448640	200271	209392	248161	176843	191977	238832			Acetylasparagene	2.86785e+06	4.60265e+06	3.6195e+06	3.89429e+06	3.73012e+06	4.09804e+06	6.08888e+06	5.46312e+06	4338474	6.64429e+06	7.99785e+06	5.33638e+06
3Hydroxybutyrate	207838	241942	418164	258113	312431	405310	446360			Arginosuccinate	355194	671358	620195	517996	422012	519375	842115	678782	589268	728630	931948	537087
Palmitoyl Carnitine	560554	415441	421869	337703	336767	378335	625028			CAMP	45900.1	45927	44518.7	34425.7	36773.1	40685	50112.9	34621.5	30435.4	35051.6	31296.1	30748.4
Acetyl Lysine	658331	408411	521400	488953	428312	452731	431010			GSH	145528	291475	262897	1.78908e+06	143023	321036	763704	210937	965601	239964	815280	1.15741e+06
Acetyl Aspartic Acid	12023.8	13474.7	3938.94	2487.74	2073.12	3524.22	5182.54			AMP	2.77775e+06	3.02745e+06	3.18182e+06	2.06892e+06	2.31092e+06	2.23573e+06	2.10722e+06	2.01142e+06	1.60081e+06	1.69485e+06	1.63523e+06	1.74567e+06
Acetylglutamic Acid	33792.7	15548.8	23426.7	13890.1	19487.6	12024.5	12750			NADH	58836.8	76440.8	83404.4	143415	76128	122055	70416.5	36225.4	85986	41076.2	79492.3	74485
SAM	363942	266191	288376	160566	167097	123560	154658			Creatinine	1.38885e+06	2.38519e+06	2.45541e+06	2.03635e+06	1.89289e+06	2.04507e+06	1.44929e+06	1.28341e+06	1.32532e+06	1.10861e+06	967707	1.3266e+06
Arginosuccinate	6.5784e+06	2.22017e+06	1.21633e+06	650770	903075	771222	304237			Ascorbic Acid	1.15791e+06	1.20208e+06	1.40265e+06	2.45665e+06	1.58174e+06	2.42099e+06	525501	435992	1.47577e+06	562976	940762	1.9733e+06
GSH	55762	67355	38462.1	319572	96743.2	414516	3.34734e+06			Glucose	1.78547e+06	2.26689e+06	2.61969e+06	2.46056e+06	2.4232e+06	3.03964e+06	2.58698e+06	2.38217e+06	3.05704e+06	3.70856e+06	4.23262e+06	3.44462e+06
AMP	559193	1.25296e+06	2.69384e+06	337496	2.43004e+06	2.85197e+06	3.99114e+06			GTP	446754	629184	650434	1.52647e+06	591967	972528	548154	507312	872849	354154	670834	568103
Creatinine	52421.6	68695.9	79101.1	108206	69320.8	79427.8	92088.9			Hypoxanthine	161415	141305	171351	154450	112043	115173	144591	133639	156330	206873	224635	153512
Ascorbic Acid	N/A	N/A	N/A	1.14279e+06	N/A	868387	1.60152e+06			Phosphocreatinine	2.25242e+07	4.55832e+07	5.21436e+07	3.42662e+07	4.12149e+07	4.62554e+07	1.96653e+07	2.43914e+07	2.31947e+07	2.12209e+07	1.89441e+07	18947695
Kynurenine	36772.8	56176.4	82778.3	106720	70260.2	90133.5	91541.5			Aminoadipic Acid	559969	406535	428129	402310	415846	558164	565367	431264	345038	521643	751662	419914
GTP	301467	441437	456619	1.0371e+06	329405	252714	338551			Citrulline	1.31279e+06	1.90921e+06	1.69124e+06	1.51707e+06	1.4127e+06	1.77495e+06	1.71213e+06	1.4188e+06	1.00515e+06	1.34471e+06	1.77049e+06	1.24965e+06
Hypoxanthine	286102	277759	399811	192862	397773	440180	519045			Adenine	1.90025e+06	2.41135e+06	2.64029e+06	1.06382e+06	1.78023e+06	1.78382e+06	1.68398e+06	2.17005e+06	1.13932e+06	3.06281e+06	2.03891e+06	1.20262e+06
Phosphocreatinine	1.7217e+06	1.70775e+06	369312	5.51847e+06	371035	50936	56399.6			Uracil	66036.6	124563	97647.6	87633.4	61812.3	89276.2	78947	89823.5	66507.6	78477.7	88258.6	73757.6
Aminoadipic Acid	426877	353802	322349	429068	369606	332521	334007			Xanthine	90601.9	217977	209144	233043	125653	323366	373048	242544	243248	642037	651426	334711
Citrulline	1.22657e+06	775559	901408	957658	916113	912198	850549			Biotin	11266.8	114859	92325.5	85752.6	87004.9	87943.5	53047.6	92873.3	62675.6	83874.9	130663	72906.3
Azelaic Acid	11893.2	20029.8	17291	23550.2	33800.2	12205.4	11501.3			Aconitate	7.24482e+06	7.68455e+06	7.96983e+06	4.70621e+06	6.11672e+06	5.57703e+06	7.85991e+06	8.26011e+06	6.45065e+06	6.1578e+06	6.57991e+06	6.34323e+06
Adenine	1.79534e+06	1.66201e+06	1.33518e+06	1.38538e+06	844254	850674	947850			Pentothenate	846564	3.16015e+06	3.97048e+06	3.09544e+06	2.65236e+06	3.73568e+06	1.55996e+06	2.19293e+06	1.77403e+06	2.35412e+06	2.10757e+06	2.01329e+06
Uracil	210944	471494	855046	287231	650675	655991	977413			Citraconic Acid	2.50479e+06	2.86492e+06	3.07844e+06	1.67966e+06	2.403e+06	2.2908e+06	2.81853e+06	2.88151e+06	2.51284e+06	2.23767e+06	2.58553e+06	2.46833e+06
Xanthine	159140	255845	540014	164148	542047	491817	737256			Glutaric Acid	538531	698222	388466	521638	549641	189949	429539	381657	600109	287651	523510	409598
N Acetyl Glycine	33487.4	31609.6	32314.9	22612.1	48979.8	36148.2	17995.8			Guanosine	201315	296335	388548	403413	251468	339069	292701	260544	315626	415307	418122	319852
Aconitate	1.08973e+06	619742	720122	962511	329079	317578	148646			Fructose 1,6 Biphosphate	4.11697e+06	2.76723e+06	3.23229e+06	7.29808e+06	2.65667e+06	5.14435e+06	1.12279e+07	7.83883e+06	9.22291e+06	8.99446e+06	1.4778e+07	1.19778e+07
Pantothenic acid	125966	225331	656437	306236	695093	364290	539314			Inosine	524677	4.0206e+06	7.34091e+06	6.29937e+06	3.23663e+06	5.01229e+06	2.33578e+06	2.45533e+06	1.9319e+06	4.16761e+06	9.6568e+06	2.99988e+06
Urate	59326.2	69868.5	189341	86476.8	84342.7	54220.3	151003			ADP	1.53051e+07	3.72259e+07	4.22264e+07	5.09227e+07	3.40743e+07	4.29058e+07	2.57111e+07	3.02105e+07	3.72938e+07	2.55973e+07	3.2407e+07	3.32761e+07
Citraconic Acid	164852	95139.8	111336	106876	69946.6	79726.6	43501.4			GMP	485366	715436	716242	760187	651120	668804	956028	799308	894449	902999	988341	866127
Guanosine	21594.3	53046.9	77614.7	55707.3	90133.6	110204	140911			Heptadecanoic Acid	7511.04	35208	42719	42014.9	23941.4	32234.9	18308.2	15022.1	15022.1	33173.8	54142.1	26288.6
Fructose 1,6 Biphosphate	1.24043e+06	1.42199e+06	1.67944e+06	2.55214e+06	1.06105e+06	888547	866131			G6P	5.15732e+06	1.24077e+07	1.35962e+07	9.13775e+06	1.02134e+07	1.12401e+07	2.16019e+07	1.93712e+07	1.98602e+07	2.62532e+07	2.75662e+07	2.53238e+07
Inosine	58054.1	355053	1.20818e+06	447689	1.06297e+06	1.44861e+06	2.12156e+06			IMP	2.22283e+06	2.76848e+06	2.5397e+06	1.88405e+06	2.12862e+06	1.95485e+06	2.24739e+06	2.05531e+06	1.79e+06	1.99968e+06	1.94742e+06	1.85486e+06
ADP	2.21006e+06	3.8236e+06	7.64064e+06	5.49107e+06	7.1166e+06	8.7551e+06	1.08801e+07			UDP	4.26406e+06	7.5724e+06	6.90198e+06	9.65355e+06	5.96166e+06	7.80141e+06	5.45032e+06	6.27415e+06	6.48885e+06	4.71472e+06	6.02488e+06	5.82677e+06
GMP	665359	994828	2.24284e+06	408414	1.97823e+06	2.95818e+06	3.53583e+06			Lactate	7.32681e+06	3.12355e+07	3.09725e+07	2.85397e+07	2.52121e+07	3.05582e+07	1.32604e+07	1.83705e+07	1.40939e+07	1.42528e+07	1.58896e+07	1.55693e+07
G6P	413114	858766	1.4142e+06	2.88347e+06	712692	727607	991697			Oxalic Acid	767467	2.17682e+06	1.91892e+06	981300	1.14498e+06	1.4117e+06	494521	858753	643293	1.01972e+06	696030	578023
IMP	628673	1.12837e+06	2.33646e+06	427983	2.08765e+06	2.49662e+06	3.35032e+06			Succinate	2.13958e+07	2.39226e+07	2.16154e+07	1.53607e+07	1.63969e+07	1.92747e+07	1.36947e+07	1.17355e+07	1.12509e+07	1.22279e+07	1.16821e+07	1.06325e+07
UDP	1.2937e+06	1.38986e+06	1.67262e+06	1.52535e+06	1.43321e+06	1.38846e+06	1.64492e+06			A-Ketoglutarate	2.80106e+06	2.95285e+06	3.00605e+06	2.15228e+06	2.3985e+06	2.48841e+06	1.88579e+06	1.64793e+06	1.56883e+06	1.68023e+06	1.60662e+06	1.48237e+06
Lactate	7.12138e+06	1.78455e+07	2.65781e+07	3.764e+07	2.87909e+07	2.65985e+07	3.91475e+07			Quinic Acid	1.34709e+07	1.61361e+07	1.86968e+07	1.16333e+07	1.03755e+07	1.43968e+07	1.11284e+07	1.09694e+07	9.77509e+06	9.62376e+06	1.18951e+07	9.82471e+06
Oxalic Acid	79571.1	142556	198263	109378	169001	83169.9	66318.5			Citrate	5.49813e+07	7.00804e+07	7.46238e+07	4.62882e+07	4.03186e+07	5.9382e+07	4.61141e+07	4.19321e+07	3.99137e+07	3.75927e+07	4.68717e+07	3.60588e+07
Succinate	1.19285e+07	1.05349e+07	1.29987e+07	1.12294e+07	9.51442e+06	1.08856e+07	1.42971e+07			Malate	1.33519e+08	1.25661e+08	1.47646e+08	1.22044e+08	1.15127e+08	114423198	1.17976e+08	1.29926e+08	1.11274e+08	1.08445e+08	1.13888e+08	1.00954e+08
A-Ketoglutarate	287071	256793	253665	564921	186923	282147	274166			Erythrose 4 Phosphate	836475	1.05234e+06	1.19161e+06	533758	935606	1.09036e+06	649398	666299	603550	763317	662386	648304
Citrate	3.08503e+06	1.37484e+06	2.48391e+06	2.10725e+06	1.3405e+06	919590	943192			Ribulose 5 Phosphate	103435	378843	423989	270556	346843	326422	215788	390736	237695	332837	284720	249267
Malate	5.27648e+07	3.68217e+07	4.31525e+07	4.60069e+07	3.01836e+07	3.13381e+07	2.6485e+07			G1P	6.12876e+06	1.45428e+07	1.63716e+07	1.06904e+07	1.21217e+07	1.36445e+07	2.27984e+07	2.19367e+07	2.3209e+07	2.76962e+07	3.12424e+07	2.62931e+07
Erythrose 4 Phosphate	38181.6	26602.4	31296.6	102965	30670.5	60402.1	61336.1			Guanine	29418.2	23941.4	45535.7	36068.6	21985.4	30591.9	55081	40841.3	52577.5	78944.5	96235.3	68168.8
Ribulose 5 Phosphate	42093.9	139583	191929	241690	202694	267196	388707			Myo Inositol	6.89455e+06	7.08156e+06	7.93893e+06	6.71022e+06	7.1155e+06	7.86068e+06	4.60341e+06	5.35673e+06	4.52329e+06	5.25496e+06	4.926e+06	4.83142e+06
G1P	425566	816840	1.16062e+06	2.79742e+06	693679	727167	914787			Hypotaurine	8.14886e+06	9.03167e+06	6.30512e+06	6.04679e+06	6.35943e+06	6.6296e+06	9.20416e+06	5.95877e+06	4.46328e+06	5.70308e+06	8.08166e+06	5.3891e+06
Carbamolyphosphate	161566	282639	447063	143492	523660	494946	613950			IPP	952678	4.75403e+06	4.75997e+06	3.96343e+06	3.75907e+06	3.76006e+06	2.97286e+06	3.05427e+06	3.17771e+06	3.78285e+06	3.46651e+06	2.99744e+06
Myo Inositol	2.29546e+06	1.90754e+06	2.39764e+06	2.52507e+06	2.18158e+06	2.59198e+06	2.62509e+06
IPP	143336	464354	689060	1.12087e+06	667779	722468	1.08597e+06
