# Supplementary material for: Nuclear NAD+-biosynthetic enzyme NMNAT1 facilitates development and early survival of retinal neurons
Source: eLife journal article supplement (doi:10.7554/elife.71185), 2021-12-08
Supplement: supp [file elife-71185-supp-v1.zip]

Archive with 15 entries (15 files):
- elife_poa_e71185_Figure_1_figure_supplement_1.pdf
- elife_poa_e71185_Figure_2_figure_supplement_1.pdf
- elife_poa_e71185_Figure_3_figure_supplement_1.pdf
- elife_poa_e71185_Figure_3_figure_supplement_2.pdf
- elife_poa_e71185_Figure_3_figure_supplement_3.pdf
- elife_poa_e71185_Figure_3_figure_supplement_4.pdf
- elife_poa_e71185_Figure_3_figure_supplement_5.pdf
- elife_poa_e71185_Figure_4_figure_supplement_1.pdf
- elife_poa_e71185_Figure_4_figure_supplement_2.pdf
- elife_poa_e71185_Figure_5_figure_supplement_1.pdf
- elife_poa_e71185_Figure_5_figure_supplement_2.pdf
- elife_poa_e71185_Supplementary_file_1.docx
- elife_poa_e71185_Transparent_Reporting_File.pdf
- elife_poa_e71185_Source_data_1.zip
- elife_poa_e71185_Transparent_Reporting_File.docx
