# Supplementary material for: Nuclear NAD+-biosynthetic enzyme NMNAT1 facilitates development and early survival of retinal neurons
Source: eLife journal article supplement (doi:10.7554/elife.71185), 2021-12-08

*Nmnat1*<sup>wt/wt</sup>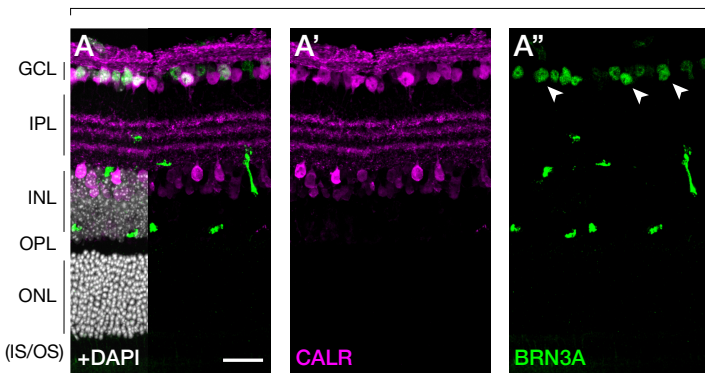*Nmnat1*<sup>wt/wt</sup> Six3-Cre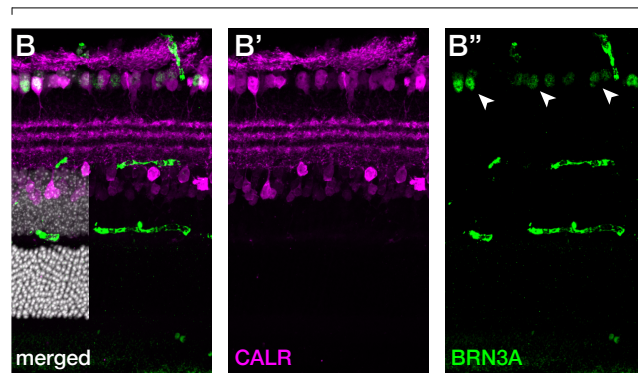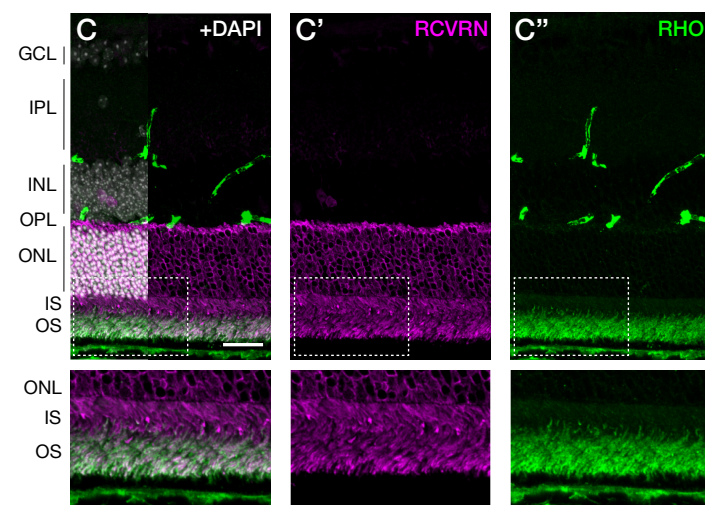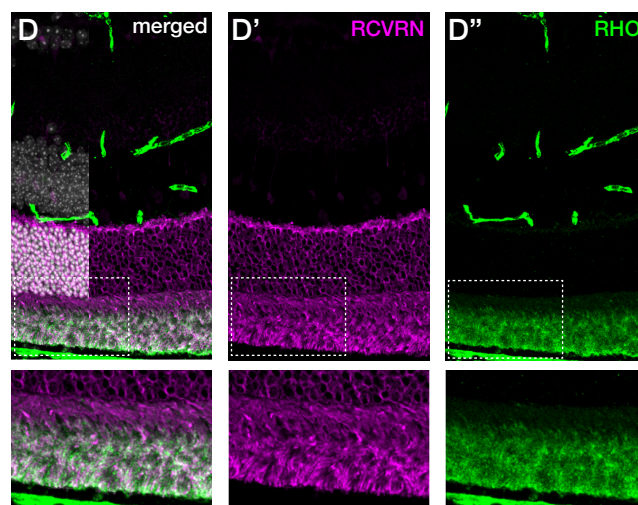*Nmnat1*<sup>wt/wt</sup>*Nmnat1*<sup>wt/wt</sup> Six3-Cre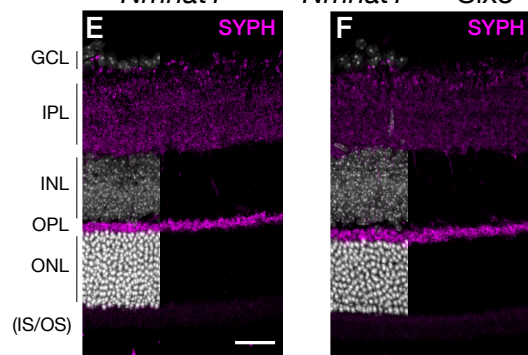*Nmnat1*<sup>wt/wt</sup>*Nmnat1*<sup>wt/wt</sup> Six3-Cre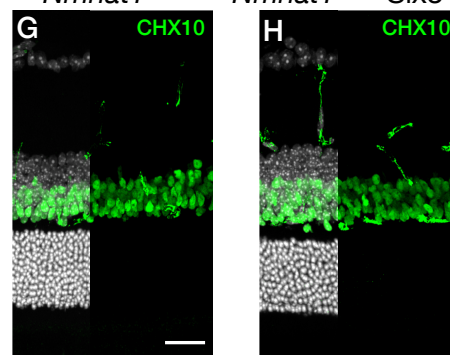

Supplement: supp [file elife-71185-supp-v1.zip › elife_poa_e71185_Figure_2_figure_supplement_1.pdf]
