# Supplementary material for: Nuclear NAD+-biosynthetic enzyme NMNAT1 facilitates development and early survival of retinal neurons
Source: eLife journal article supplement (doi:10.7554/elife.71185), 2021-12-08
Supplement: supp [file elife-71185-supp-v1.zip › elife_poa_e71185_Figure_4_figure_supplement_2.pdf]

## Apoptosis

A.

+/+ -/-

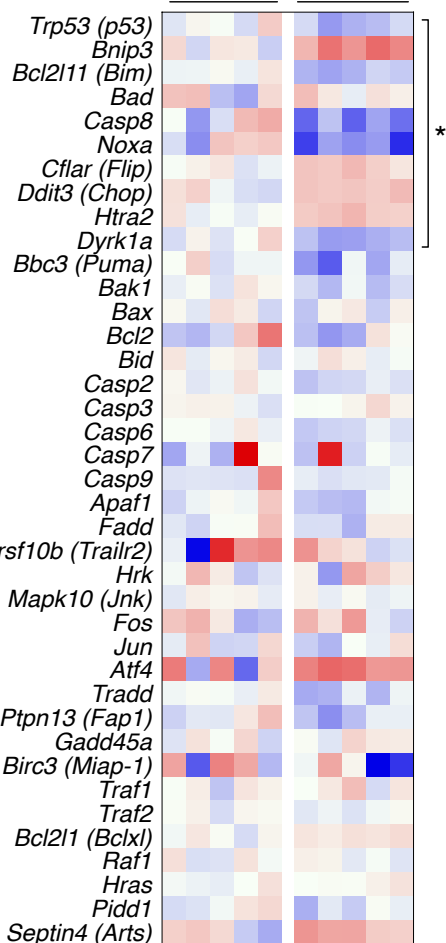

-1.0 -0.5 0 0.5 1.0  
log<sub>2</sub>(relative expression)

B.

+/+ -/-

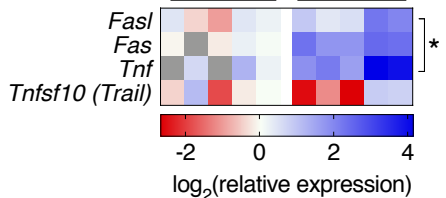

-2 0 2 4  
log<sub>2</sub>(relative expression)

## Necroptosis

C.

+/+ -/-

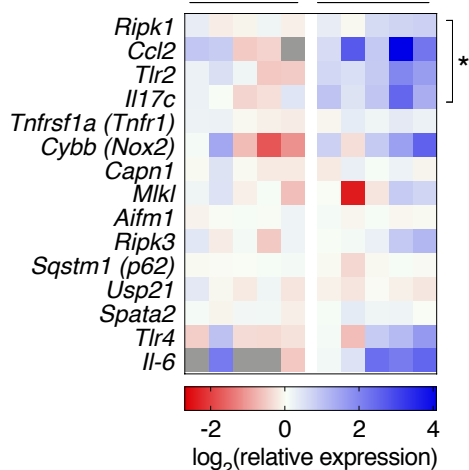

-2 0 2 4  
log<sub>2</sub>(relative expression)

## Ferroptosis

D.

+/+ -/-

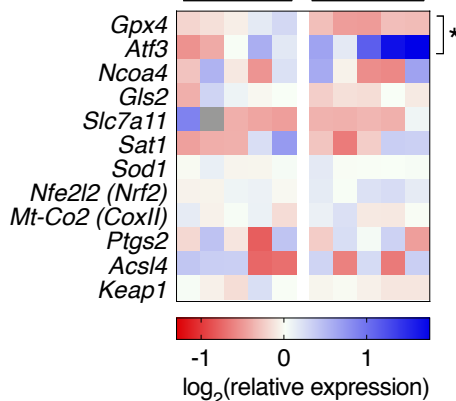

-1 0 1  
log<sub>2</sub>(relative expression)

## Pyroptosis

E.

+/+ -/-

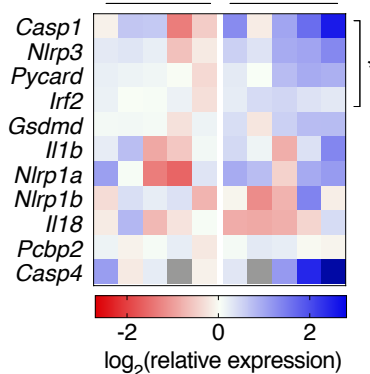

-2 0 2  
log<sub>2</sub>(relative expression)
