# Supplementary figures and images for: Nuclear NAD+-biosynthetic enzyme NMNAT1 facilitates development and early survival of retinal neurons
Source: eLife journal article supplement (doi:10.7554/elife.71185), 2021-12-08

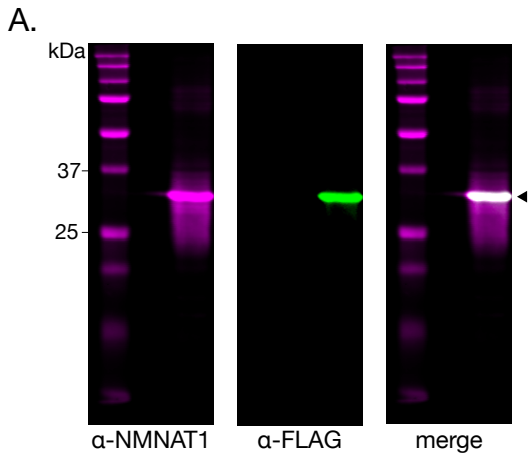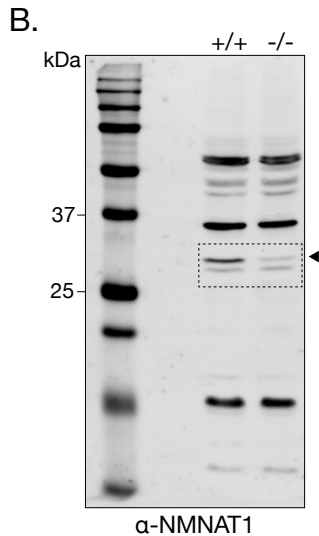

Supplement: supp [file elife-71185-supp-v1.zip › elife_poa_e71185_Figure_1_figure_supplement_1.pdf]

P0

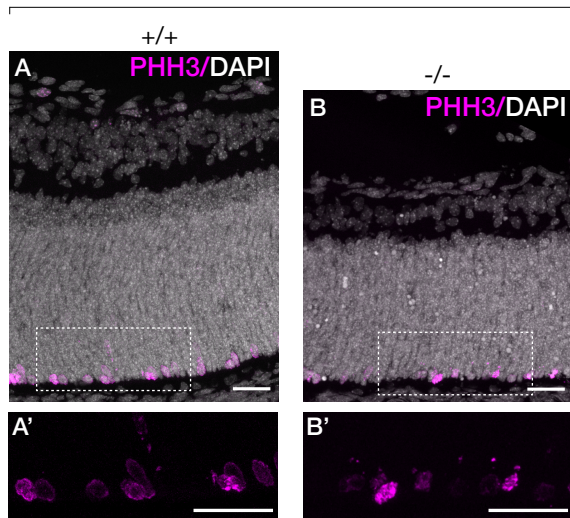

C.

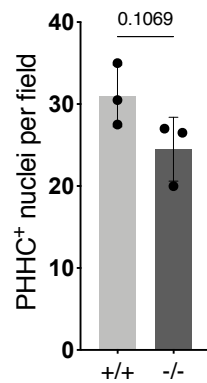

P4

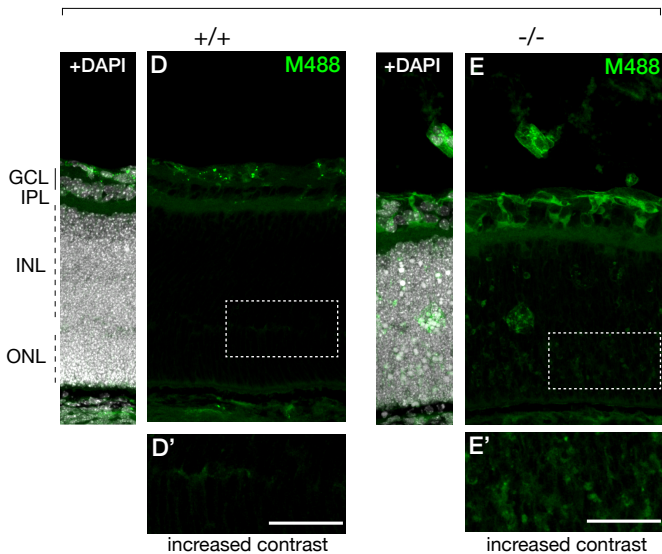

P10

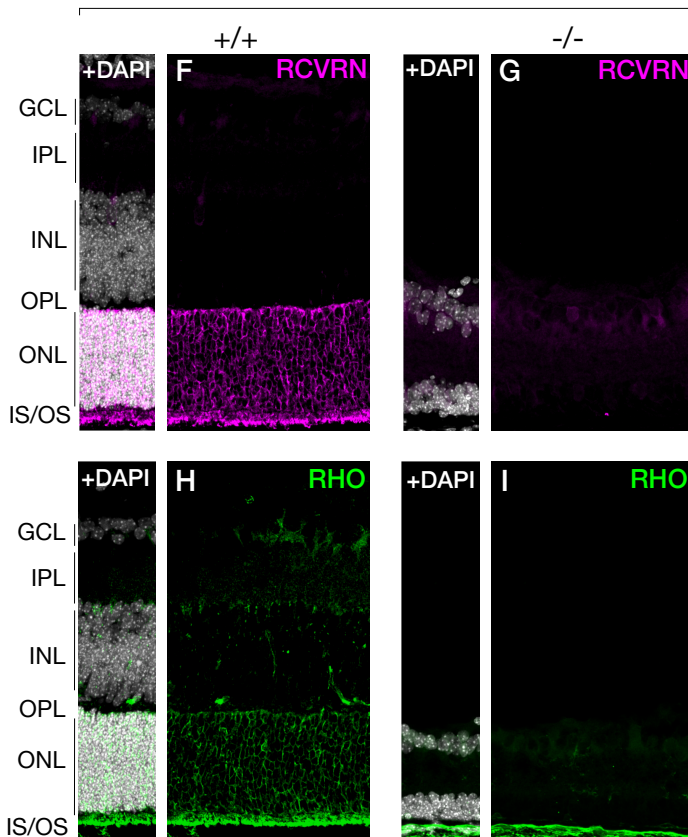

J.

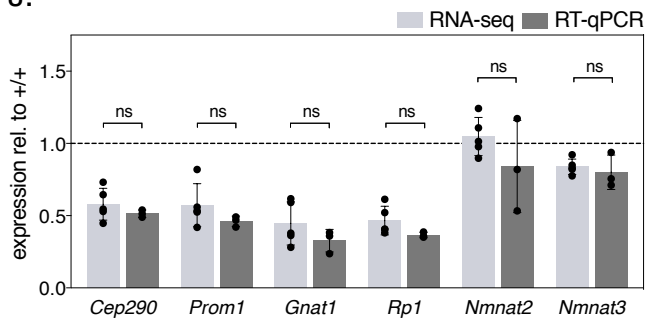

Supplement: supp [file elife-71185-supp-v1.zip › elife_poa_e71185_Figure_3_figure_supplement_1.pdf]

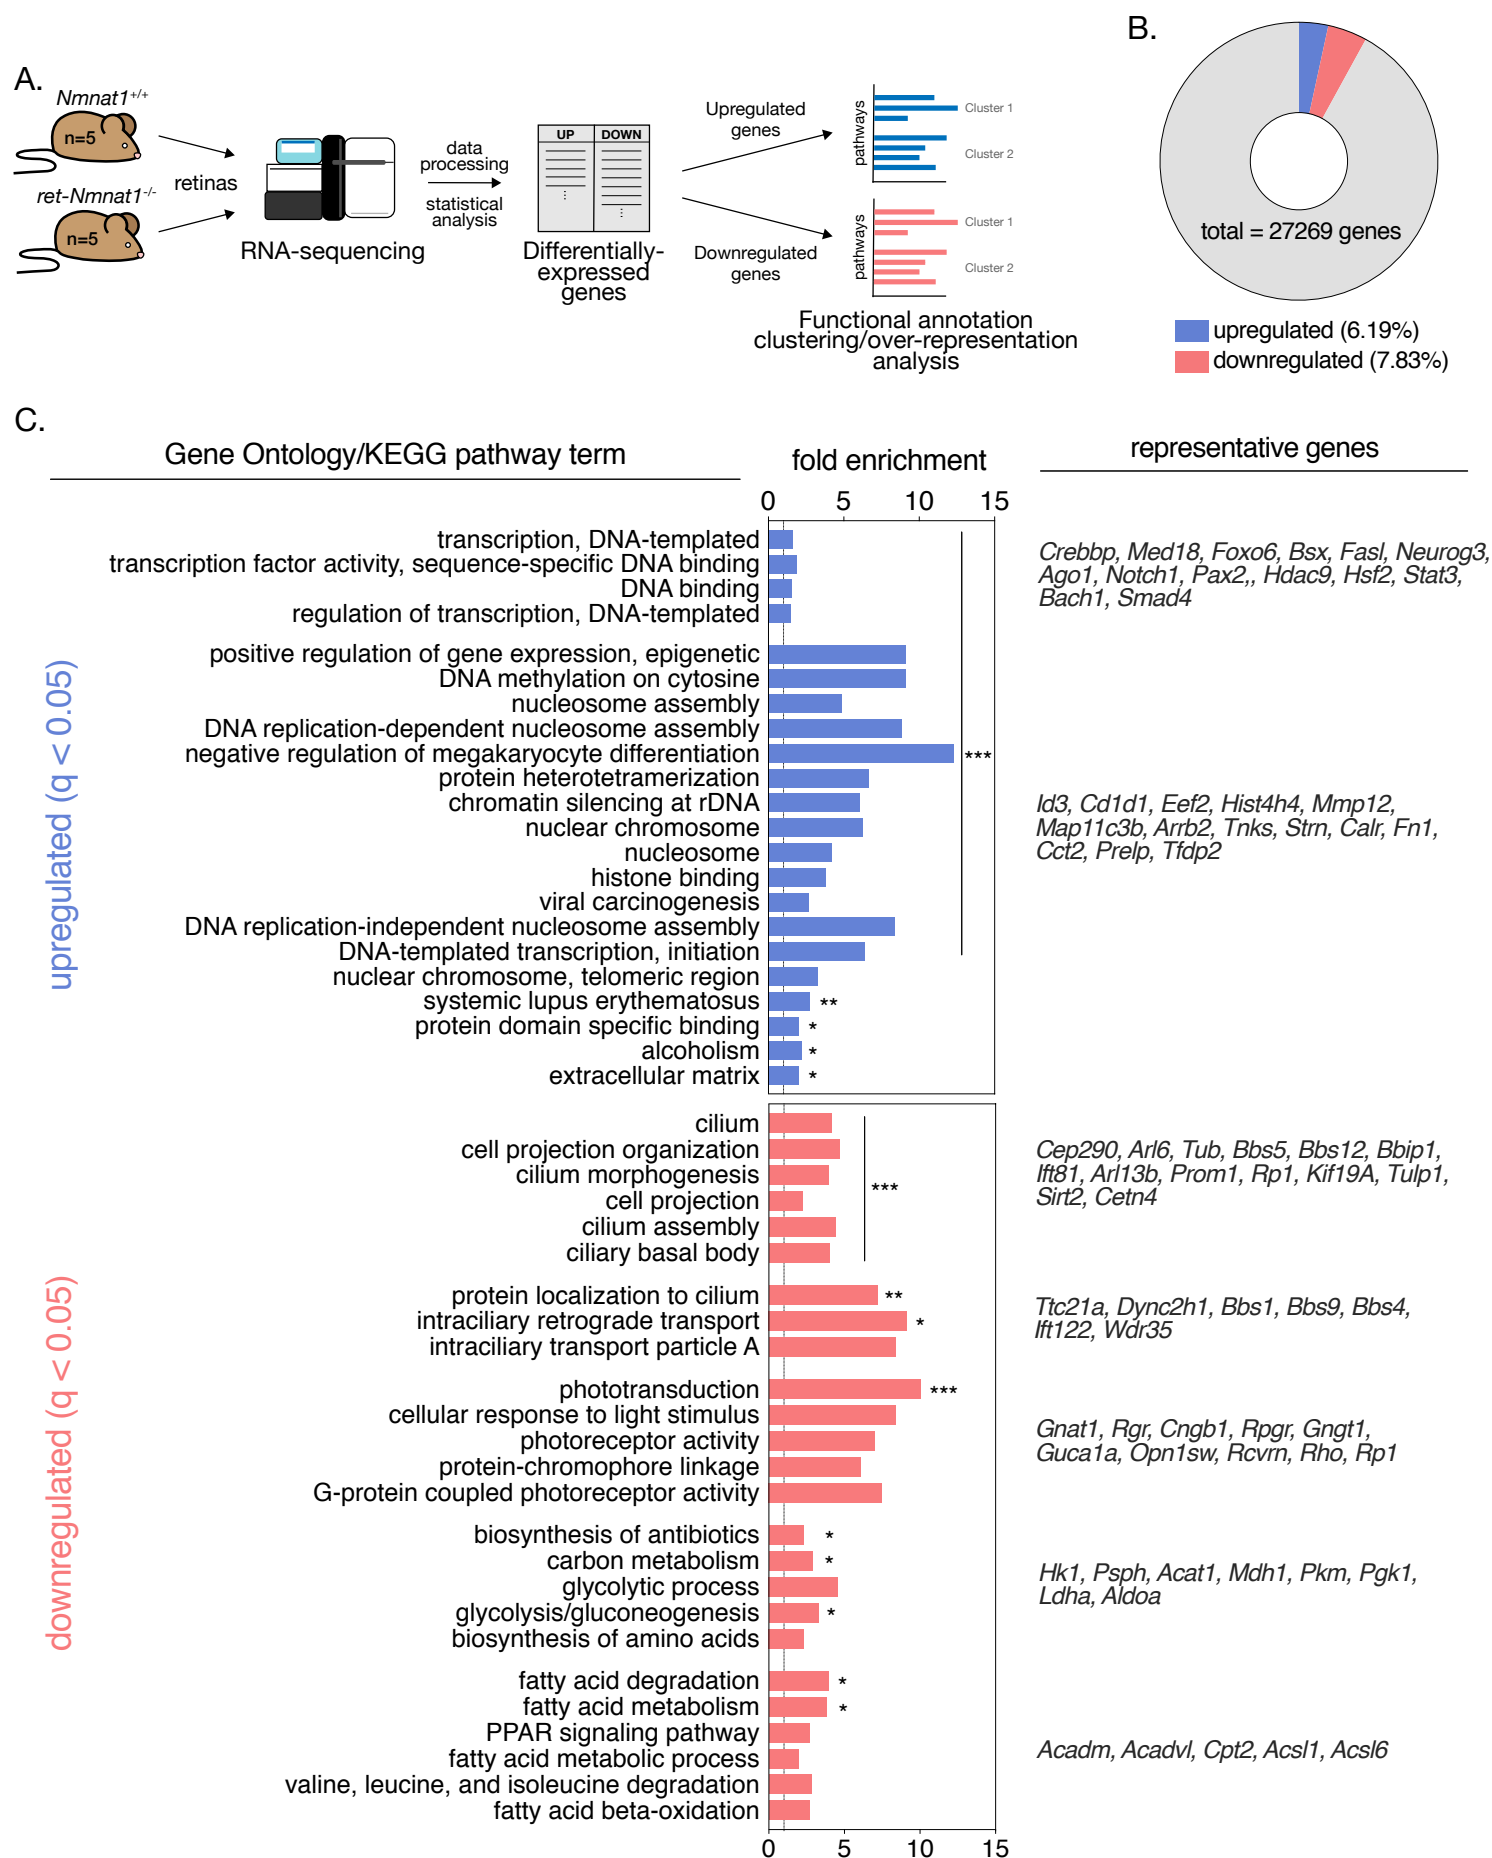

Supplement: supp [file elife-71185-supp-v1.zip › elife_poa_e71185_Figure_3_figure_supplement_2.pdf]

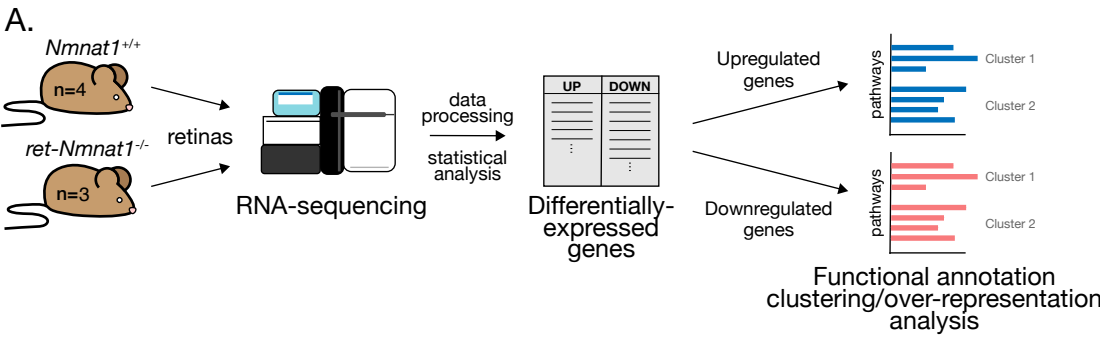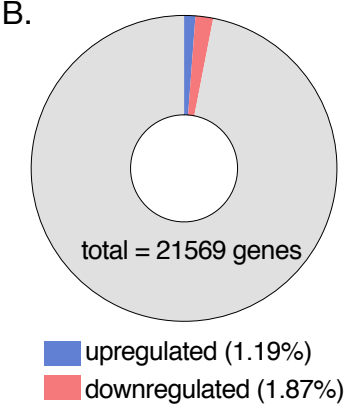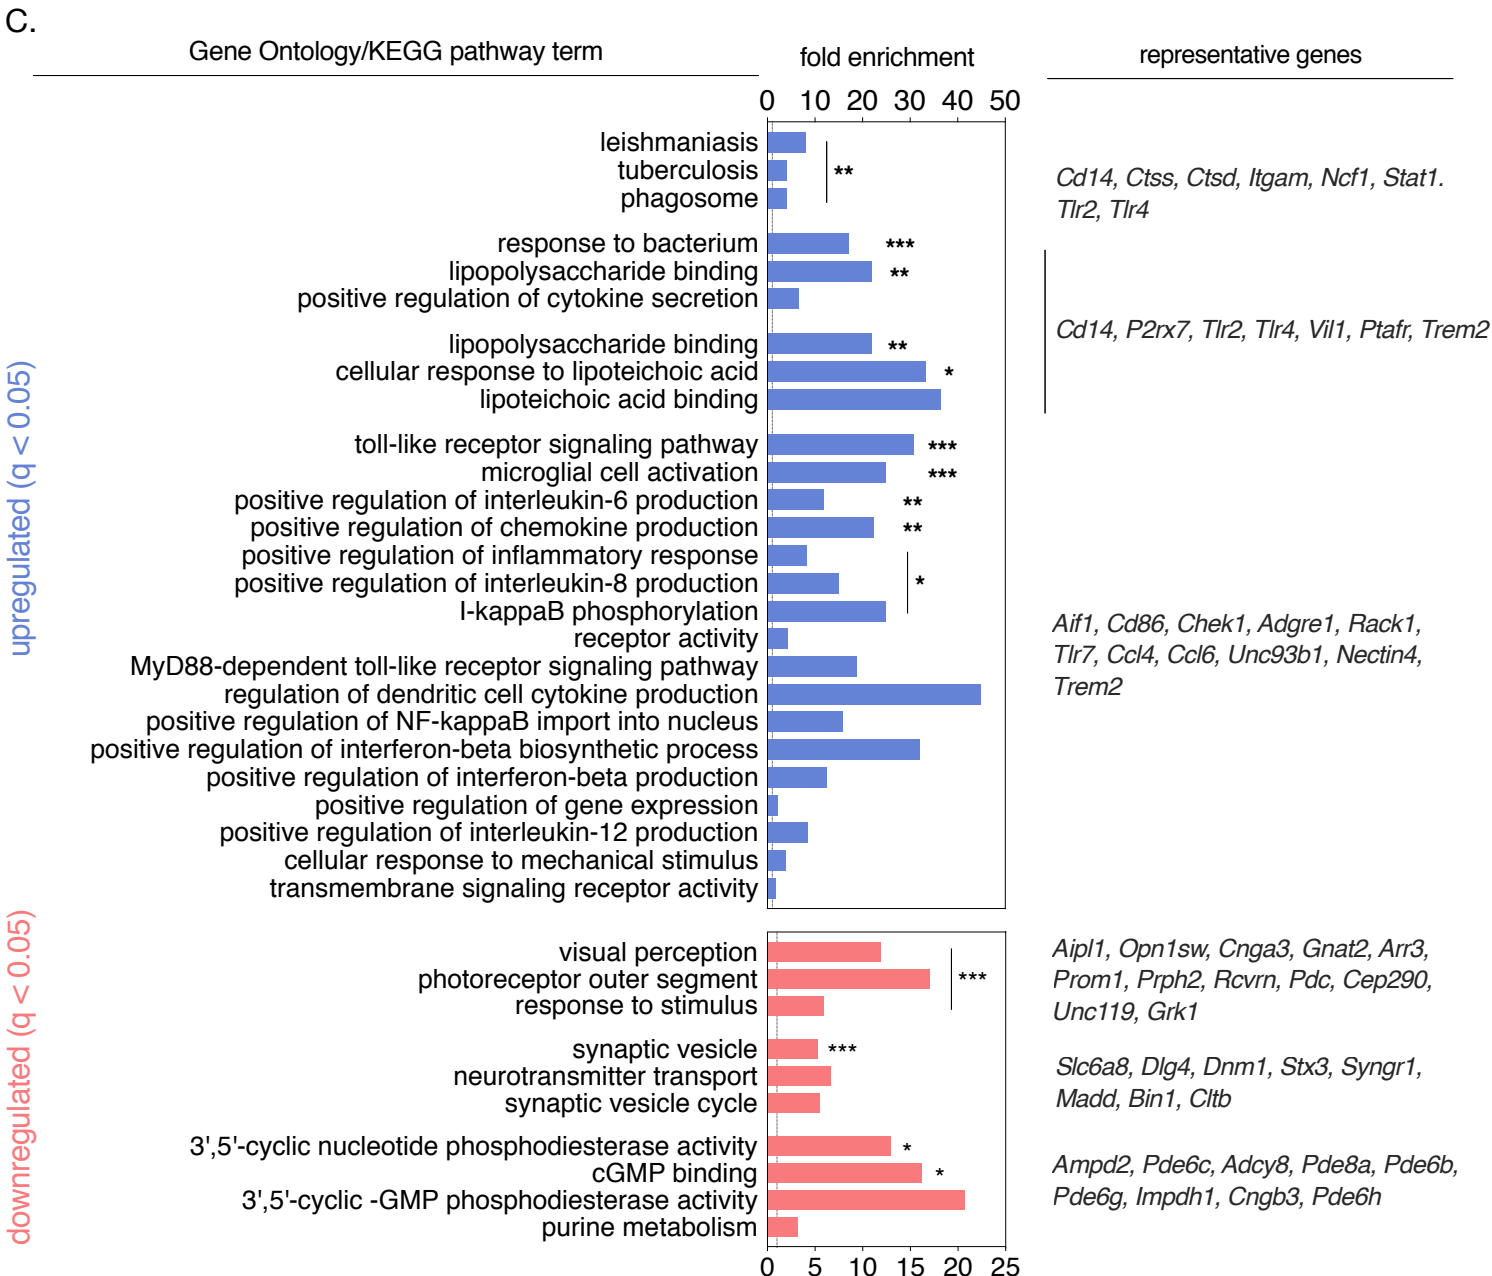

Supplement: supp [file elife-71185-supp-v1.zip › elife_poa_e71185_Figure_3_figure_supplement_3.pdf]

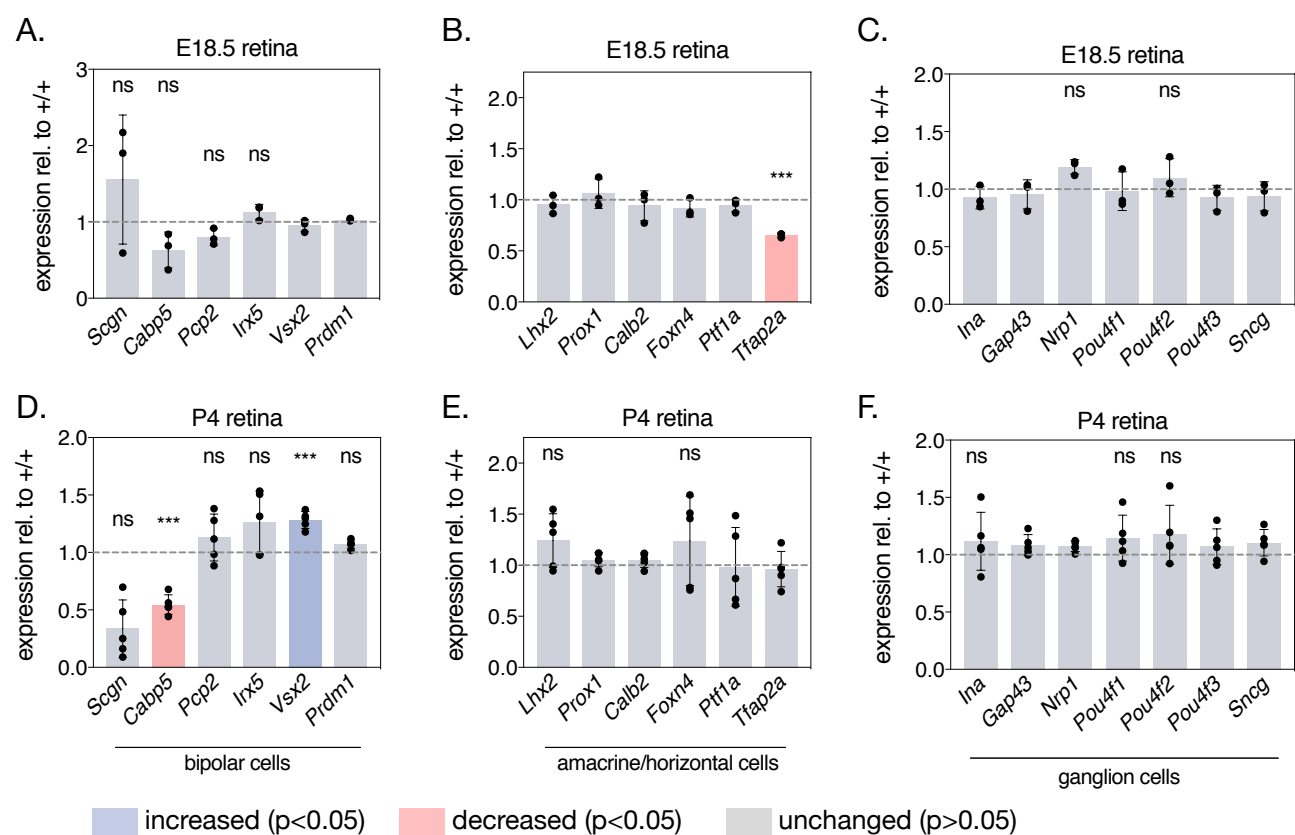

Supplement: supp [file elife-71185-supp-v1.zip › elife_poa_e71185_Figure_3_figure_supplement_4.pdf]

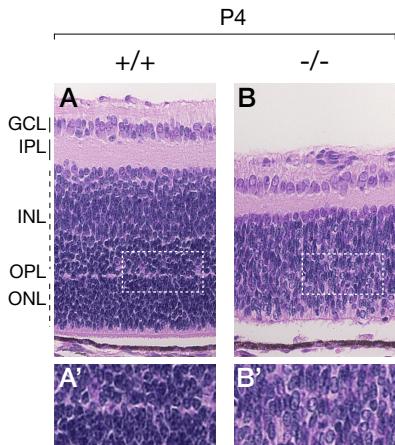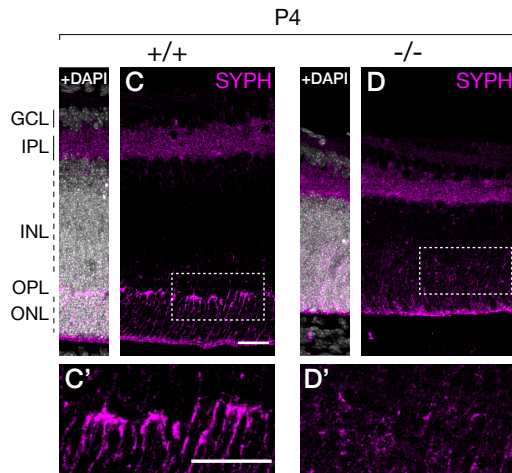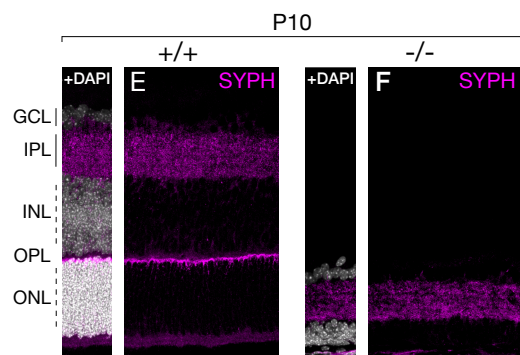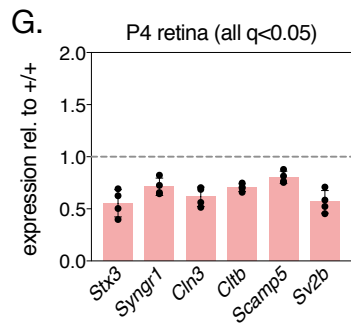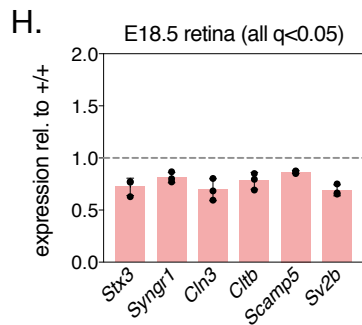

Supplement: supp [file elife-71185-supp-v1.zip › elife_poa_e71185_Figure_3_figure_supplement_5.pdf]

# E18.5 retina

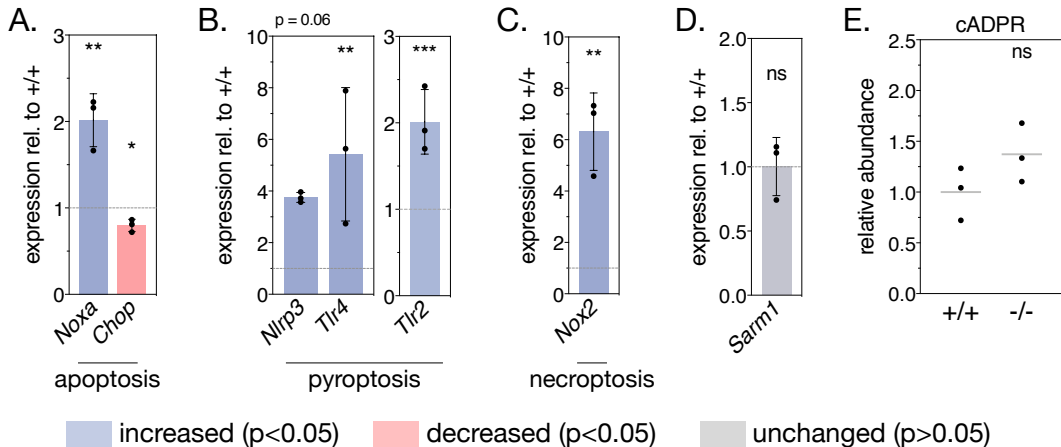

Supplement: supp [file elife-71185-supp-v1.zip › elife_poa_e71185_Figure_4_figure_supplement_1.pdf]

A.

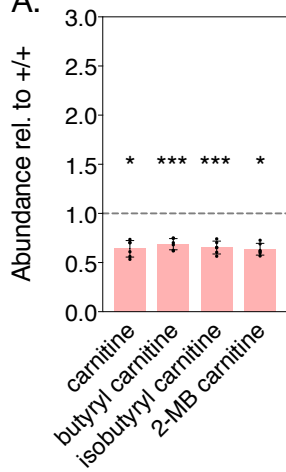

B.

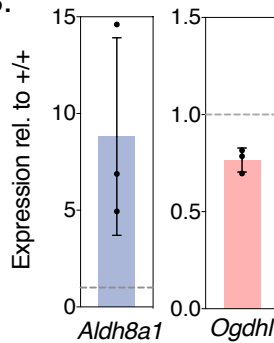

C.

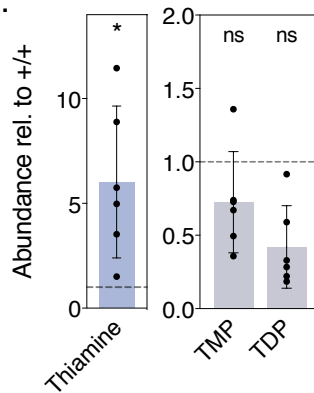

D.

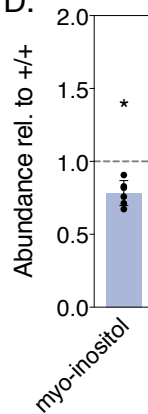

E.

E18.5 PCA Scores

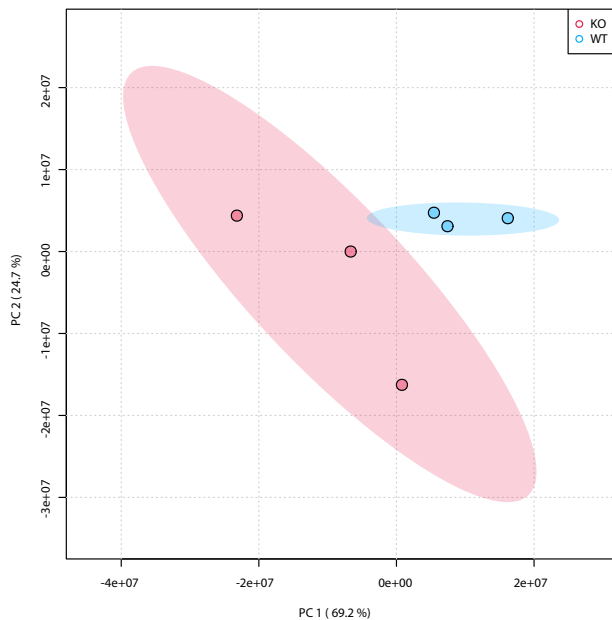

F.

P4 PCA Scores

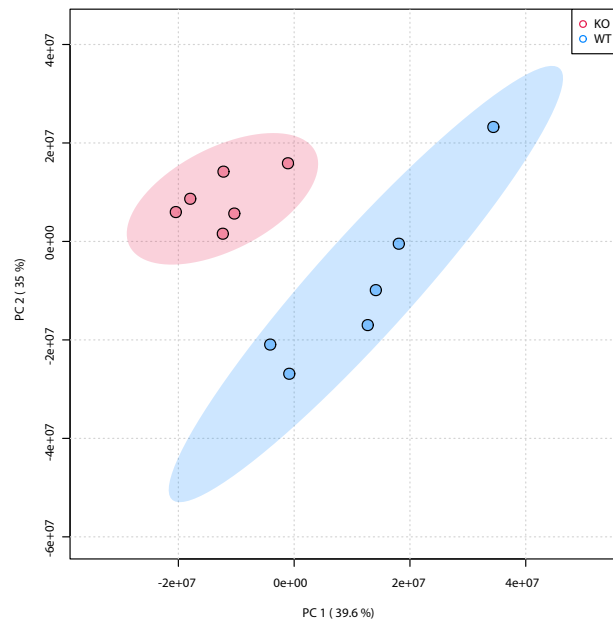

Supplement: supp [file elife-71185-supp-v1.zip › elife_poa_e71185_Figure_5_figure_supplement_1.pdf]

A.

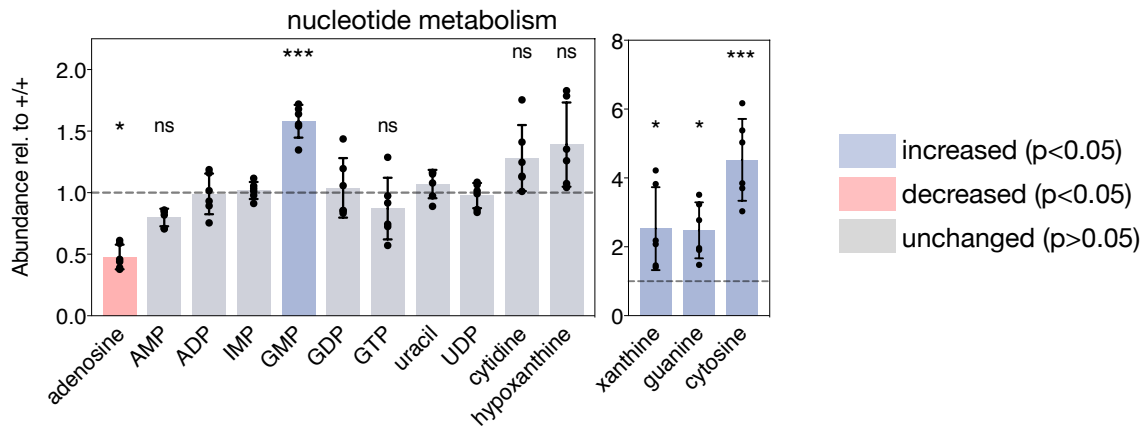

B.

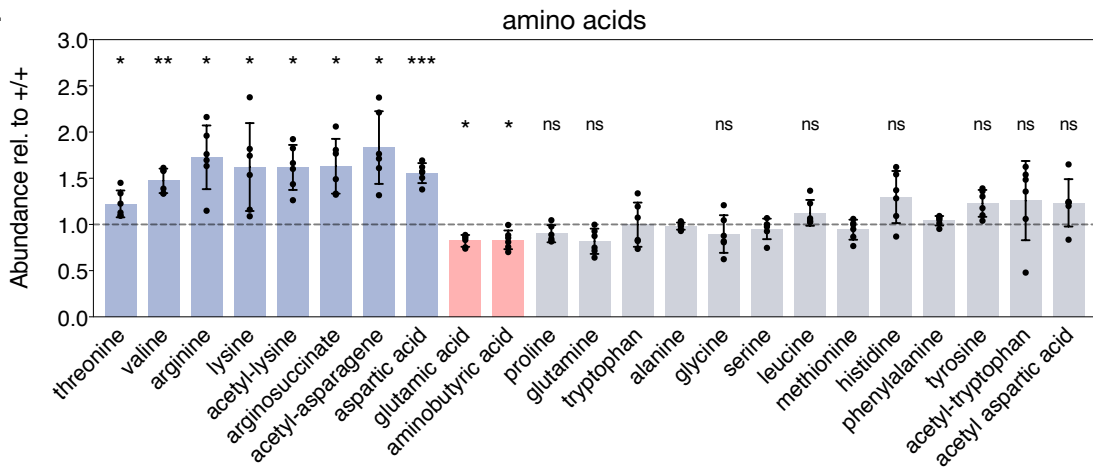

Supplement: supp [file elife-71185-supp-v1.zip › elife_poa_e71185_Figure_5_figure_supplement_2.pdf]

## Apoptosis

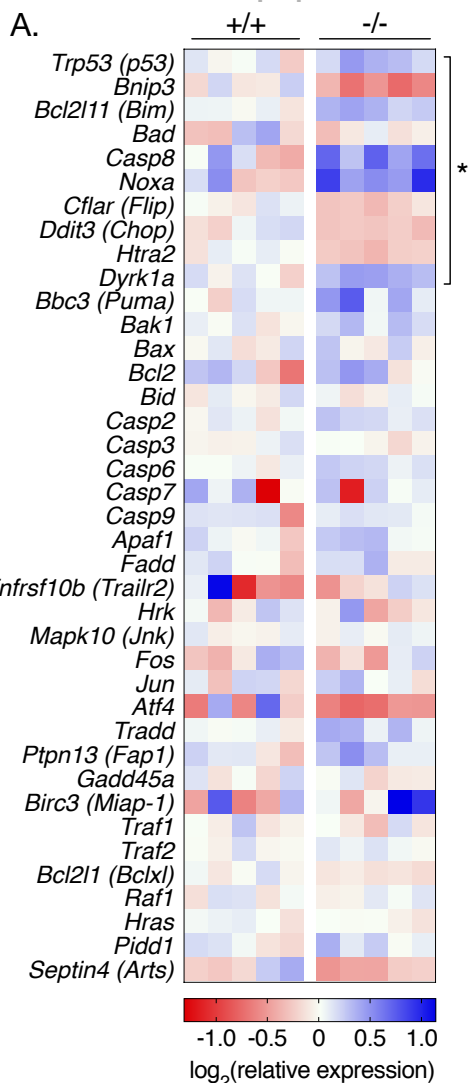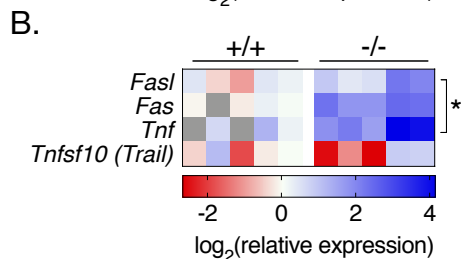

## Necroptosis

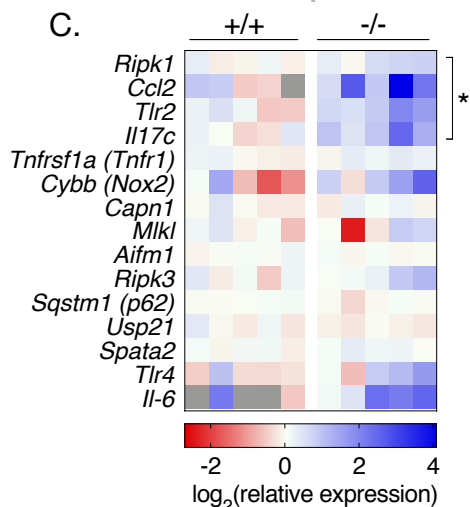

## Ferroptosis

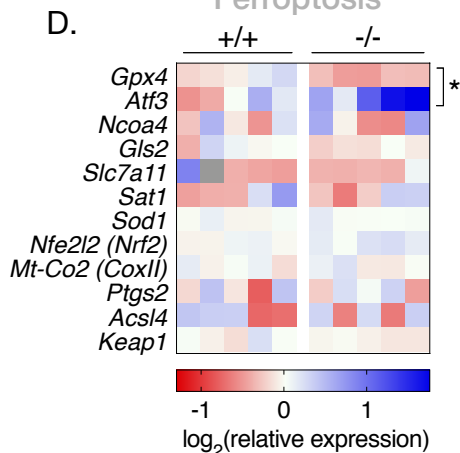

## Pyroptosis

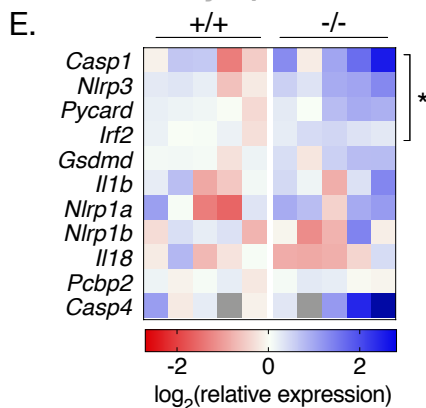

Supplement: supp [file elife-71185-supp-v1.zip]
